# Supplementary material for: Global analysis of protein homomerization in Saccharomyces cerevisiae
Source: HighWire-hosted journal article supplement (doi:10.1101/gr.231860.117), 2018-12-19
Supplement: Supplemental_Material.docx [file Supplemental_Material.docx]

**SUPPLEMENTAL METARIAL**

**Supplemental Figures**

(Continued)

**Supplemental Fig. S1.** Examples of self-assembly signals. (*A*) Self-assembly signals detected at the same subcellular locations as the signals of homomers. *Left* panels show the BiFC images of cells expressing both VN- and VC-tagged target proteins. *Right* panels show the BiFC images of cells expressing VC-tagged target proteins and free VN. The names of proteins tagged with VN or VC is indicated at the *top* of images. For detailed data, see also Supplemental Table S4. (*B*) Self-assembly signals detected at different subcellular locations from the signals of homomers. *Left* panels show the BiFC images of cells expressing both VN- and VC-tagged target proteins. *Right* panels show the BiFC images of cells expressing VC-tagged target proteins and free VN. The names of proteins tagged with VN or VC is indicated at the *top* of images. For detailed data, see also Supplemental Table S4.

(Continued)

**Supplemental Fig. S2.** Co-IP assay of homomer candidates. *MAT***a** GFP-tagged and *MAT*α HA-tagged strains were mated and the resulting diploid cells were subjected to Co-IP assay. The names of proteins tagged with GFP or HA are designated at the *right* of each blot. The positions of molecular weight markers (in kDa) are indicated on the *left* of each blot.

**Supplemental Fig. S3.** Spot assay to evaluate the effect of BiFC complex formation on protein function. Growth phenotypes of homozygous diploids (GOI-VC × GOI-VC) versus heterozygous diploids (GOI-VN × GOI-VC) were examined. Eight genes of which null mutants are known to be inviable or show decreased growth rate were selected so that we can easily detect phenotypic changes potentially caused by lengthened duration of homomerization resulting from the BiFC complex formation. Five-fold serial dilution of each strain were spotted on SC agar media and incubated either at 23°C, 30°C, or 37°C for three days. Names of genes and tagged epitopes are indicated at the *left* of the panels.

**Supplemental Fig. S4.** TheBiFC analysis of Rad52 homomer. Cells expressing N-terminally VN- or VC-tagged Rad52 were constructed and mated with cells expressing C-terminally VN- or VC-tagged Rad52. The resulting diploid cells expressing four kinds of combinations of VN- and VC-tagged Rad52 (Rad52-VN × Rad52-VC, Rad52-VN × VC-Rad52, VN-Rad52 × Rad52-VC, and VN-Rad52 × VC-Rad52) were subjected to the BiFC assay. Scale bars, 2 m.

**Supplemental Fig. S5.** Representative fluorescence images of proteins showing the partial localization between the BiFC and GFP signals. Protein names are indicated to the *right* of images. Five candidates that are shown in Fig. 3E (Kes1, Srp1, Utp30, Mcx1, and Pse1) are not included.

**Supplemental Fig. S6.** Changein theBiFC signals of homomer candidates under nitrogen starvation. (*A*) Representative BiFC images of homomer candidates showing increased BiFC signals under nitrogen starvation and restored BiFC signals after transfer to nitrogen-containing medium. Scale bars, 2 m. (*B*) Representative BiFC images of homomer candidates showing decreased BiFC signals under nitrogen starvation and restored BiFC signals after transfer to nitrogen-containing media. Scale bars, 2 m.

**Supplemental Fig. S7.** Confirmation of changes in protein homomerization by flow cytometry. (*Left* panel) Eight homomers showing increased fluorescence intensity under nitrogen starvation. (*Right* panel) Eight homomers showing decreased fluorescence intensity under nitrogen starvation. Gray and black bars indicate relative fluorescence intensity under the normal and nitrogen-deprived condition, respectively. At least 100,000 cells were counted at each condition and the mean intensity was calculated from three independent experiments. Cells expressing VN- and VC-tagged Mds3 were used as a negative control to normalize fluorescent intensity of the candidates. Error bars represent the standard deviation. Asterisks indicate significant differences compared with the normal condition (**P* < 0.05; Student’s *t-*test).

**Supplemental Fig. S8.** GFP signal localization of homomer candidates under nitrogen starvation. The GFP signals of homomer candidates that showed changes in the BiFC signal localization under nitrogen starvation were analyzed under the same condition. Scale bars, 2 μm.

**Supplemental Fig. S9.** (*Left*) BiFC analysis between Pln1 and Scs3, Sei1, or Yft2. (*Right*) GFP signals of Scs3, Sei1, and Yft2. Names of tagged proteins are indicated to the left of each image. Sei1 is a yeast homolog of seipin, and Scs3 and Yft2 are FIT2 homologs. Strains expressing N-terminally GFP- or VN-tagged forms of these proteins under the *CET1* promoter, which is stronger than their own endogenous promoters, were constructed and their BiFC and GFP signal were analyzed. Although Scs3, Sei1, and Yft2 are known to gather at the sites of nascent lipid droplet formation, none of the N-terminally VN-tagged forms showed a BiFC signal with VC-tagged Pln1 while the N-terminally GFP-tagged forms showed proper expression and localization.

**Supplemental Fig. S10.** PCH analysis of Pln1-GFP and free GFP. In PCH analysis, the distribution of photon burst from each fluorescent particle is described as two parameters, the molecular brightness of the particle and the average number of particles in the analyzed volume (Chen et al. 1999). Of the two parameters, the molecular brightness can be used as a marker for protein association (Muller et al. 2000). The brightness (counts per second per molecule; cpsm) of Pln1-GFP and free GFP was counted and shown as a histogram. Black and red bars indicate the frequency of free GFP and Pln1-GFP, respectively. The brightness of free GFP was analyzed by using a strain carrying a vector encoding the *GFP* gene under the *ADH1* promoter. Peaks of Pln1-GFP are marked with black arrowheads. A single cell was measured for five times and total 25 cells were analyzed for each strain.

**Supplemental Fig. S11.** Interaction between Pln1 and Slc1. (*Upper* panel) The BiFC assay for the interaction of Pln1 with Slc1. (*Lower* panel) Co-IP assay to validate the interaction of Pln1 with Slc1. Co-IP assay was performed using myc-tagged Pln1 expressed under the *ADH1* promoter and GFP-tagged Slc1. The positions of molecular weight markers (in kDa) are indicated on the *left* of each blot.

**Supplemental Fig. S12.** Quantification BiFC signals of Fas1-Pln1 and Fas2-Pln1 interactions by flow cytometry. Diploid cells expressing VN-tagged Pln1 and VC-tagged Fas1 or Fas2 were incubated in SC or SD-N media and their fluorescence intensities were analyzed by flow cytometry. Fluorescence intensities were normalized by using Mds3-VN/Mds3-VC cells as a negative control. Gray bars indicate BiFC signal intensity obtained under normal condition and black bars indicate BiFC signal intensity obtained under nitrogen starvation condition. Gray and black bars indicate the mean±SD BiFC signal intensity obtained from three independent experiments under normal condition and nitrogen starvation, respectively. Asterisks indicate significant differences compared with normal condition (**P*<0.05; Student’s *t-*test).

**Supplemental Fig. S13.** BiFC and GFP analysis of truncated mutant forms of Pln1. (*Upper*) Representative BiFC and GFP images of truncated mutant forms of Pln1. The N-terminal truncated (amino acid residues 1-94 were deleted), the middle-truncated (amino acid residues 95-187 were deleted), and the C-terminal truncated (amino acid residues 188-282 were deleted) *pln1* mutants are indicated as *pln1(1-94)*Δ, *pln1(95-187)*Δ, and *pln1(188-283)*Δ, respectively. (*Lower*) Representative GFP images of the N-terminal truncated *pln1* mutants. Mutants with deletion of amino acid residues 1-31, 32-62, and 63-94 are indicates as *pln1(1-31)*Δ, *pln1(32-62)*Δ, and *pln1(63-94)*Δ, respectively.

**Supplemental Methods**

**Yeast strains and culture conditions**

*S. cerevisiae* strains used in this study are listed in Supplemental Table S14. For the mating type switching, cells were grown in SC medium containing 2% raffinose instead of glucose. After overnight incubation, cells were transferred to SC medium containing 2% galactose and incubated for 4 h. For 5-fluoroorotic acid (5-FOA) treatment, 5-FOA was added to SC medium to a final concentration of 1 mg/ml. For nitrogen starvation, cells grown to mid-logarithmic phase in SC medium were washed twice with and incubated in SD-N medium (0.17% yeast nitrogen base without amino acids and ammonium sulfate, 2% glucose) for 90 min at 30°C. For media change after starvation, cells incubated in SD-N medium were washed twice with and incubated in SC medium for 30 min at 30°C.

**Construction of plasmids**

The oligonucleotide primers used in this study are listed in Supplemental Table S1. For the construction of pFA6a-VC-LEU2 vector, the ~1,900 bp PCR product of *LEU2* was obtained using pCgLEU2 as a template, forward primer CgLEU2-600 (BamHI), and reverse primer CgLEU2+1320R (TEF). In addition, the ~250 bp PCR product of *Ashbya gossypii* TEF terminator was obtained using pFA6a-GFP-His3MX6 (Longtine et al. 1998) as a template, forward primer T (TEF)-F3-L, and reverse primer T (TEF)-R. Using the two PCR products as templates, the ~2,150 bp PCR product was obtained using forward primer pCgLEU2-600 (BamHI) and reverse primer T (TEF)-R as previously described (Horton, 1997). Next, the obtained ~2,150 bp PCR product was digested with BamHI and PmeI and ligated into the BglII-PmeI-digested pFA6a-VC-KlURA3 (Sung et al. 2008), generating pFA6a-VC-LEU2. To construct p416ADH-PLN1-GFP vector, the ~3,000 bp PCR product of PLN1-GFP region was obtained using genomic DNA of cells expressing C-terminally GFP-tagged Pln1 as a template, forward primer PLN1_F (SLIC), and reverse primer GFP+1000R (KpnI). The PCR product was digested with XbaI and KpnI and ligated into XbaI-KpnI-digested pRS416ADH. To construct p416ADH-PLN1-Myc, pFA6a-Myc-KlURA3 was digested with PacI and AscI and ligated into the PacI-AscI-digested p416ADH-PLN1-GFP. To construct pFA6a-His3MX6-pCET1-LZ, a vector for tagging the leucine zipper motif to the N-terminus of the target gene, the ~200 bp PCR product of bZIP domain was obtained using BY4741 genomic DNA as a template, forward primer bZIP_F (PacI), and reverse primer bZIP_R (AscI). The LZ motif sequence (MKQLEDKVEELLSKNYHLENEVARLKKLVGE) was derived from Gcn4, a bZIP transcriptional activator that is known to dimerize through this sequence (Ellenberger et al. 1992). The PCR product was digested with PacI and AscI and ligated into PacI-AscI-digested pFA6a-His3MX6-pCET1-VN (Sung and Huh 2007).

**Microscopic analysis and fluorescence quantification**

For a genome-wide screen of protein homomers, each strain of the VC-tagged *MAT*α strain collection was grown to mid-logarithmic phase at 30°C in YPD medium and mated with its cognate strain of the VN-tagged *MAT***a** strain collection. Diploid cells were selected on SC-LU medium. Then diploid cells were grown to mid-logarithmic phase at 30°C in SC medium and were microscopically analyzed in 96-well glass-bottomed microplates (MGP096, Matrical Bioscience). Microscopy was performed on a Nikon Eclipse E1 microscope with a Plan Fluor 100×/1.30 NA oil immersion objective. Fluorescence images were taken using a PhotoFluor LM-75 light source (89 North Inc.) with appropriate filters. Quantification of fluorescent images (BiFC and GFP) was performed using the NIS-Elements imaging software (Nikon). Cell boundary was defined manually and the sum fluorescence intensity of single cell was obtained. Background fluorescence intensity of non-cell area of the analyzed image was also quantified and subtracted from the sum fluorescence intensity of single cell, resulting in the net fluorescence intensity of single cell. For each experiment, at least 50 cells were analyzed and the mean intensity±SD values were calculated. Cells expressing Mds3-VN and Mds3-VC were used as a negative control.

**Co-IP assay**

Diploid cells expressing GFP- and HA- or myc-tagged target proteins were used for Co-IP assay. Cell extracts were prepared as previously described (Sung et al. 2008). An anti-myc antibody (SC-40, Santa Cruz) or anti-HA antibody (SC-7932, Santa Cruz) was added to cell extracts and incubated with gentle rocking for 4 h at 4°C. Protein A-Sepharose (17-5138-01, GE healthcare) was then added to the immunoprecipitation reaction and incubated with gentle rocking for 4 h at 4°C. For control, only protein A-sepharose was treated without antibody for the same cell extracts. Beads were washed four times with 25 mM Tris, pH 7.5, 150 mM NaCl, and 0.2% NP40. After the final wash, beads were resuspended in SDS sample buffer, boiled, and then loaded on SDS-PAGE gels. Proteins were detected with a HRP-conjugated anti-GFP antibody (SC-9996 HRP, Santa Cruz), a HRP-conjugated anti-myc antibody (SC-40 HRP, Santa Cruz), or a HRP-conjugated anti-HA antibody (SC-7392 HRP, Santa Cruz).

**Flow cytometry**

Flow cytometry of cells were performed based on description in the previous study (Murozuka et al. 2013) using BD FACS canto II (BD Biosciences) equipped with BD FACSDiva 8.0.1 software. The yeast cells were incubated in SC to OD600 = 1.0 and washed twice and suspended in phosphate buffered saline (PBS) to make 1 ml suspension. For starvation condition, cells grown in SC media were washed twice and incubated in SD-N media for 90 min at 30°C. 100,000 cells were analyzed at each condition and intensities of fluorescence of cells were plotted on a histogram using FITC (525 nm) and the geometric mean of fluorescence intensity was obtained using BD FACSDiva software. For negative control, cells expressing VN and VC-tagged Mds3 were used to normalize fluorescence intensity of the candidates. At least three independent experiments were performed for each condition, and the results were presented as mean±SD with *P*-value calculated using Student’s *t*-tests.

**FCS and PCH analysis**

FCS and PCH measurements were all performed at 25°C with a LSM 780 confocal microscope (Carl Zeiss) equipped with GaAsP multichannel spectral detectors as previously described (Herrick-Davis et al. 2013; Kim et al. 2017). Confocal pinhole diameter was adjusted to 35 μm for the 488 nm laser. Emission signal was detected at 500-550 nm for GFP. Cells grown to OD600 = 1.0 at 30°C in YPD medium were diluted to OD600 = 0.1 in SC medium. After 4 h of incubation, FCS and PCH measurements on yeast cells were recorded sequentially 10 times with duration of 5 s. Laser power was adjusted to minimize photobleaching of the GFP probe while maintaining a good signal to noise ratio, because rapid and gradual photobleaching by cellular depletion of GFP affected diffusion analysis of fluorescence correlation functions and PCH analysis. 140 cells were measured for each experiment. Autocorrelation analyses were performed using the ZEN 2012 software package (Carl Zeiss) and FCS data were fit to a three-dimensional model with one or two-components as previously described (Kawai-Noma et al. 2009; Pack et al. 2014). PCHs were constructed using the PCH module in the ZEN software (Herrick-Davis et al. 2013). The structure parameter in FCS analysis and the first-order correction in PCH analysis were respectively determined with the standard Rhodamine 6G solution and then fixed for live cell experiment (Huang et al. 2004; Kawai-Noma et al. 2009).

**TAG quantification assay**

Cells grown to mid-logarithmic phase were washed with cold phosphate-buffered saline and homogenized in two volumes of 5% NP-40 solution. Cells were disrupted by bead beating and then heated for 5 min at 80°C. Cell lysates were cooled down to room temperature and heated again. All insoluble materials were removed by centrifugation at 13,000 rpm for 3 min. TAG was quantified by using the Triglyceride Quantification Assay kit (ab65336, Abcam) according to the manufacturer's instructions. Detection was performed using the FlexStation 3 microplate reader (Molecular Devices) and the absorbance at 570 nm was measured. The net absorbance was obtained by subtracting the absorbance of the blank and then normalized by the number of cells. For TAG measurement of nitrogen-deprived cells, cells were first grown to mid-logarithmic phase in YPD medium and then were transferred to SD-N medium and incubated for 4 h at 30°C, followed by sample preparation as described above.

**Supplemental References**

Chen Y, Muller JD, So PTC, Gratton E. 1999. The photon counting histogram in fluorescence fluctuation spectroscopy. *Biophysical Journal* **77**: 553-567.

Ellenberger TE, Brandl CJ, Struhl K, Harrison SC. 1992. The GCN4 basic region leucine zipper binds DNA as a dimer of uninterrupted alpha helices: crystal structure of the protein-DNA complex. *Cell* **71**: 1223-1237.

Gao Q, Binns DD, Kinch LN, Grishin NV, Ortiz N, Chen X, Goodman JM. 2017. Pet10p is a yeast perilipin that stabilizes lipid droplets and promotes their assembly. *J Cell Biol* **216**: 3199-3217.

Herrick-Davis K, Grinde E, Cowan A, Mazurkiewicz JE. 2013. Fluorescence correlation spectroscopy analysis of serotonin, adrenergic, muscarinic, and dopamine receptor dimerization: the oligomer number puzzle. *Mol Pharmacol* **84**: 630-642.

Huang B, Perroud TD, Zare RN. 2004. Photon counting histogram: one-photon excitation. *Chemphyschem* **5**: 1523-1531.

Kawai-Noma S, Pack CG, Tsuji T, Kinjo M, Taguchi H. 2009. Single mother-daughter pair analysis to clarify the diffusion properties of yeast prion Sup35 in guanidine-HCl-treated [PSI] cells. *Genes Cells* **14**: 1045-1054.

Kim HJ, Kwon S, Nam SH, Jung JW, Kang M, Ryu J, Kim JE, Cheong JG, Cho CY, Kim S et al. 2017. Dynamic and coordinated single-molecular interactions at TM4SF5-enriched microdomains guide invasive behaviors in 2- and 3-dimensional environments. *FASEB J* **31**: 1461-1481.

Longtine MS, McKenzie A, 3rd, Demarini DJ, Shah NG, Wach A, Brachat A, Philippsen P, Pringle JR. 1998. Additional modules for versatile and economical PCR-based gene deletion and modification in Saccharomyces cerevisiae. *Yeast* **14**: 953-961.

Muller JD, Chen Y, Gratton E. 2000. Resolving heterogeneity on the single molecular level with the photon-counting histogram. *Biophys J* **78**: 474-486.

Murozuka E, Hanisch S, Pomorski TG, Jahn TP, Schjoerring JK. 2013. Bimolecular fluorescence complementation and interaction of various Arabidopsis major intrinsic proteins expressed in yeast. *Physiol Plant* **148**: 422-431.

Pack CG, Yukii H, Toh-e A, Kudo T, Tsuchiya H, Kaiho A, Sakata E, Murata S, Yokosawa H, Sako Y et al. 2014. Quantitative live-cell imaging reveals spatio-temporal dynamics and cytoplasmic assembly of the 26S proteasome. *Nat Commun* **5**: 3396.

Sung MK, Ha CW, Huh WK. 2008. A vector system for efficient and economical switching of C-terminal epitope tags in Saccharomyces cerevisiae. *Yeast* **25**: 301-311.

Sung MK, Huh WK. 2007. Bimolecular fluorescence complementation analysis system for in vivo detection of protein-protein interaction in Saccharomyces cerevisiae. *Yeast* **24**: 767-775.
