# Supplementary material for: Global analysis of protein homomerization in Saccharomyces cerevisiae
Source: HighWire-hosted journal article supplement (doi:10.1101/gr.231860.117), 2018-12-19
Supplement: Supplemental_Tables.zip [file Supplemental_Table_S1.xlsx]

## Sheet: Sheet1
Supplemental Table S1. Oligonucleotide primers used in this study.
Primer	Sequence (5' to 3')
F2CORE	GGTCGACGGATCCCCGGGTT
R1CORE	TCGATGAATTCGAGCTCGTT
CgLEU2-600 (BamHI)	GTCAGGATCCAAGGCTTCAAGTCATATAGC
CgLEU2+1320R (TEF)	CGTCATTGGTAGTCATTATGCGGATTTACG
T(TEF)-F3-L	CGTAAATCCGCATAATGACTACCAATGACGTTCCCTCAAC
T(TEF)-R	CATCGATGAATTCGAGCTCG
VC+20R	TTTCTGTTTCAGGTCGTTCG
F2 CHK	AACCCGGGGATCCGTCGACC
CgCHK	GGTCATAGCTGTTTCCTGTG
PLN1-CHK	CTCTTGGTGTTCAAGGAGGG
PLN1-F	CCATCTGTGGAATTGCCACAAGCAACCTGGTCGCATCTGCCACAGGAAACAGCTATGACC
PLN1-R	GCCTTTAGCTTCTCAATGGTGGCATTGCCCAAGTCCAACCGTTGTAAAACGACGGCCAGT
PLN1-400	AGAAGAAGATGATGATCACG
RAD52-F4	ATGCAAACAAGGAGGTTGCCAAGAACTGCTGAAGGTTCTGGAATTCGAGCTCGTTTAAAC
RAD52-R5-VN	AAACGGGCTTCTTCTCATCCATATCCATAATTTCATTCATACCACCAGAACCCTCGATGTTGTGGCGGATC
RAD52-R5-VC	AAACGGGCTTCTTCTCATCCATATCCATAATTTCATTCATACCACCAGAACCCTTGTACAGCTCGTCCATG
R5-BiFC-CHK	CAAGATCCGCCACAACATCG
GFP_F, XbaI	ACTCTAGAATGAGTAAAGGAGAAGAACTTTTC
GFP_R, BamHI	ATGGATCCTTTGTATAGTTCATCCATGCC
DGA1-F	TAAGGAAACGCAGAGGCATACAGTTTGAACAGTCACATAACACAGGAAACAGCTATGACC
DGA1-R	AATGAATTCATTATTACCCAACTATCTTCAATTCTGCATCGTTGTAAAACGACGGCCAGT
DGA1-400	CTGGTAATCAGAGCAAGAAG
VN-6 (BamHI)	CAGAGGATCCCTATGAGTTTAATTAACAGATC
VN+519R (XhoI)	GTCACTCGAGGCCCTACTCGATGTTGTGGC
bZIP_F (PacI)	GCTTAATTAACGAATCCAGTGATCCTGCTGC
bZIP_R (AscI)	ATGGCGCGCCTTCGCCAACTAATTTCTTTAATC
PLN1_F4	GTATCGGTAATCATTAACCATCACTCACTCTCCAGAACCGGAATTCGAGCTCGTTTAAAC
N-bZIP-to-PLN1	CCACAGATGGTTTAGAAGAAGAAATAGATGATTCAGACATACCACCAGAACCTTCGCCAACTAATTTCTTTAATC
PLN1+300R	GAACCACACCAGCCAGATCC
HSP104_F2	CGATAATGAGGACAGTATGGAAATTGATGATGACCTAGATGGTCGACGGATCCCCGGGTT
HSP104_R1	ATTCTTGTTCGAAAGTTTTTAAAAATCACACTATATTAAATCGATGAATTCGAGCTCGTT
HSP104-CHK	CAAAGATCCAAGAATCTACC
ERG6-F2	CGCCGAAACCCCCTCCCAAACTTCCCAAGAAGCAACTCAAGGTCGACGGATCCCCGGGTT
ERG6-R1	ATATCGTGCGCTTTATTTGAATCTTATTGATCTAGTGAATTCGATGAATTCGAGCTCGTT
ERG6-CHK	TGAACTAGGTGATGGTATCC
VMA2-F2	CGGTAAGAAGAAGGACGCCAGCCAAGAAGAATCTCTAATCGGTCGACGGATCCCCGGGTT
VMA2-R1	GACAAAATAAAAAAAGCCTTTTTCTTCAGCAACCGTCCTCTCGATGAATTCGAGCTCGTTT
VMA2-CHK	TACCGAGGGTCAAATCTTCG
COP1-F2	TAA GAT CGG TGC ACC TGC ATC CGG ATT AAGAAT ACG TGT AGG TCG ACG GAT CCC CGG GTT
COP1-R1	CAGAATACAATCCCGAGAAAATCAATAGGCAAAATAGCATTCGATGAATTCGAGCTCGTT
COP1-CHK	TACTGTACGCATGCTTGAGC
ATG8-R5-VC	TTTTTTCAAATGGATATTCAGACTTAAATGTAGACTTCAT ACCACCAGAACCCTTGTACAGCTCGTCCATG
ATG8-R3	TTTTTTCAAATGGATATTCAGACTTAAATGTAGACTTCATACCACCAGAACCGCACTGAGCAGCGTAATCTG
ATG8-F4	TAAAGTTGAGAAAATCATAATAAAAATAATTACTAGAGACGAATTCGAGCTCGTTTAAAC
YLL067C-F2	CGTTGAAGTTCTCGCTGCAGATAACACGAGGGTACCATGCGGTCGACGGATCCCCGGGTT
YLL067C-R1	GAACATCATTCGCTATCCAGCTCTTTGTGAACCGCTACCATCGATGAATTCGAGCTCGTT
YLL067C-CHK	ATCGAAGACAGAGGTGCTGC
PPS1-F2	CATCTGTAGGGGTATCGCTGAGGTTAATATGAAGTACACAGGTCGACGGATCCCCGGGTT
PPS1-R1	TACGTATTATACAGTTGTACGTATACTTATATAACAAAGTTCGATGAATTCGAGCTCGTT
PPS1-CHK	AGAGCTGATACTGTGGTCAG
GEM1-F2	TACGTTAATGAAATTATTCAAATCATCAAAATTCTCAAAAGGTCGACGGATCCCCGGGTT
GEM1-R1	GAAATGCAACACTTCCCTAATATAGAAATTTGGGCATTAATCGATGAATTCGAGCTCGTT
GEM1-CHK	CTACCGTTGGTATTTGTAGC
ALT1-F2	GGAAAGTTTCCATAAAGAATTTTTTGACCAATACCGTGACGGTCGACGGATCCCCGGGTT
ALT1-R1	TATTTAAATGTTTATTGAAGACTGTTCTGCCCCCTTTTATTCGATGAATTCGAGCTCGTT
ALT1-CHK	TGATGGTTCGTCCACCAGTG
AAT2-F2	TGATGAAGTGGTGCGCTTCTATACTATTGAAGCTAAATTGGGTCGACGGATCCCCGGGTT
AAT2-R1	ATGAAGAGTGTAATAGGTAAGTATAAGTATTATTTAATCATCGATGAATTCGAGCTCGTT
AAT2-CHK	ATGTACGGTGAGCGTGTAGG
FBP1-F2	TGAAATTGACAAATTTTTAGACCATATTGGCAAGTCACAGGGTCGACGGATCCCCGGGTT
FBP1-R1	TACAGAACAAAGAAAATAAGAAAAGAAGGCGATCATTGAATCGATGAATTCGAGCTCGTT
FBP1-CHK	ACCCTCTACTGGAACGAGAC
MST27-F2	GCGGCATCCCAATATCGATGCGCTTCTTAAAAAGACGGAAGGTCGACGGATCCCCGGGTT
MST27-R1	TCTAGTTTATGTTCGCTTTACGTATGGCAGTGTCTCTAAGTCGATGAATTCGAGCTCGTT
MST27-CHK	TTAGTGGATGTCATCACACG
YML009C-A-F2	GCCCCGCCGTAGGCTGACCTATCACCGGTACCACCCCAAGGGTCGACGGATCCCCGGGTT
YML009C-A-R1	TCCACTTGGGCGTCGGGTGGTGAATCTAATGGTGCCATGTTCGATGAATTCGAGCTCGTT
YML009C-A-CHK	TCGAATACGCAGACGTTACG
PHO84-F2	CATTGAATCTTCCAGCCCATCTCAACTTCAACATGAAGCAGGTCGACGGATCCCCGGGTT
PHO84-R1	TTTGTTCTAGTTTACAAGTTTTAGTGCATCTTTGAGGCTTTCGATGAATTCGAGCTCGTT
PHO84-CHK	TGGTGACCATGGTCTGTTGG
SCO2-F2	GGAGCGTAGGTCAAAAAAATGGTACTCTTTTATCTTCAATGGTCGACGGATCCCCGGGTT
SCO2-R1	GTTCGGTATCCTAGCTGTGTCTTTTTCTTTTTTTTTTTGCTCGATGAATTCGAGCTCGTT
SCO2-CHK	TGTCCAGAAGAGCTTGACAG
