# Supplementary material for: Global analysis of protein homomerization in Saccharomyces cerevisiae
Source: HighWire-hosted journal article supplement (doi:10.1101/gr.231860.117), 2018-12-19
Supplement: Supplemental_Tables.zip [file Supplemental_Table_S2.xlsx]

## Sheet: mating type a strains
Supplemental Table S2. List of the MATa VC fusion library strains.
No.	ORF	Plate	Coordinate
1	YLR106C	1	A01
2	YLR454W	1	A02
3	YJL130C	1	A03
4	YKL182W	1	A04
5	YNL339C	1	A05
6	YBR208C	1	A06
7	YNL172W	1	A07
8	YOR341W	1	A08
9	YOR326W	1	A10
10	YGL173C	1	A11
11	YDR180W	1	A12
12	YKR054C	1	B01
13	YPR117W	1	B02
14	YPL085W	1	B03
15	YJL207C	1	B04
16	YLR305C	1	B05
17	YDR545W	1	B06
18	YDL140C	1	B07
19	YDR283C	1	B08
20	YOR191W	1	B09
21	YHR164C	1	B11
22	YGL150C	1	B12
23	YHR099W	1	C01
24	YHR165C	1	C02
25	YCR032W	1	C03
26	YGR271W	1	C04
27	YIL177C	1	C05
28	YLR467W	1	C06
29	YMR229C	1	C07
30	YMR219W	1	C08
31	YCR089W	1	C09
32	YHR186C	1	C10
33	YKL101W	1	C11
34	YGL197W	1	C12
35	YDR457W	1	D01
36	YIL129C	1	D02
37	YER155C	1	D03
38	YNL271C	1	D04
39	YJL225C	1	D05
40	YMR306W	1	D06
41	YOR290C	1	D07
42	YGL206C	1	D08
43	YNL139C	1	D09
44	YLR247C	1	D10
45	YDR334W	1	D11
46	YKL010C	1	D12
47	YLR087C	1	E01
48	YFR019W	1	E02
49	YER172C	1	E03
50	YGR184C	1	E04
51	YPL231W	1	E05
52	YFL033C	1	E06
53	YDR141C	1	E07
54	YJR140C	1	E08
55	YNL242W	1	E09
56	YML072C	1	E10
57	YBL034C	1	E11
58	YJL095W	1	E12
59	YBL088C	1	F01
60	YNR016C	1	F02
61	YDL171C	1	F03
62	YLR422W	1	F04
63	YLR024C	1	F05
64	YJL109C	1	F06
65	YKR031C	1	F07
66	YOR093C	1	F08
67	YDR127W	1	F09
68	YAR050W	1	F10
69	YPL167C	1	F11
70	YAL029C	1	F12
71	YDR150W	1	G01
72	YLR430W	1	G02
73	YMR207C	1	G03
74	YHR023W	1	G04
75	YHL030W	1	G05
76	YKL014C	1	G06
77	YER190W	1	G07
78	YCL014W	1	G08
79	YJR138W	1	G09
80	YOL004W	1	G10
81	YLR256W	1	G11
82	YER164W	1	G12
83	YGL195W	1	H01
84	YNL262W	1	H02
85	YCR093W	1	H03
86	YBR275C	1	H04
87	YPL082C	1	H05
88	YER132C	1	H06
89	YML059C	1	H07
90	YNL297C	1	H08
91	YNR031C	1	H09
92	YPR184W	1	H10
93	YPL242C	1	H11
94	YNL102W	1	H12
95	YLL021W	2	A01
96	YDL112W	2	A02
97	YCR081W	2	A03
98	YPR164W	2	A04
99	YIL159W	2	A05
100	YAL017W	2	A06
101	YCR073C	2	A07
102	YDR159W	2	A08
103	YMR076C	2	A09
104	YJL197W	2	A10
105	YLL066C	2	A11
106	YNL257C	2	A12
107	YOR116C	2	B01
108	YAL024C	2	B02
109	YDR443C	2	B03
110	YGL131C	2	B04
111	YIR019C	2	B05
112	YLR371W	2	B06
113	YDR216W	2	B07
114	YOR296W	2	B08
115	YPL137C	2	B09
116	YML081W	2	B10
117	YLL067C	2	B11
118	YHR155W	2	B12
119	YEL022W	2	C01
120	YDR464W	2	C02
121	YMR259C	2	C03
122	YJL042W	2	C04
123	YOR336W	2	C05
124	YFL036W	2	C06
125	YAL063C	2	C07
126	YLR398C	2	C08
127	YLR436C	2	C09
128	YDR293C	2	C10
129	YNL273W	2	C11
130	YPL012W	2	C12
131	YLR320W	2	D01
132	YLR419W	2	D02
133	YLR086W	2	D03
134	YBR115C	2	D04
135	YML049C	2	D05
136	YLR384C	2	D06
137	YJR092W	2	D07
138	YKL215C	2	D08
139	YDL195W	2	D09
140	YOR227W	2	D10
141	YGL251C	2	D11
142	YCR033W	2	D12
143	YGR116W	2	E01
144	YMR280C	2	E02
145	YMR176W	2	E03
146	YLR466W	2	E04
147	YIL126W	2	E05
148	YHR080C	2	E06
149	YPL016W	2	E07
150	YDL019C	2	E08
151	YOR124C	2	E09
152	YDR104C	2	E10
153	YGR090W	2	E11
154	YPR095C	2	E12
155	YMR190C	2	F01
156	YPR189W	2	F02
157	YJR031C	2	F03
158	YBL047C	2	F04
159	YDR227W	2	F05
160	YLR278C	2	F06
161	YNL250W	2	F07
162	YOR330C	2	F08
163	YKL129C	2	F09
164	YBL007C	2	F10
165	YFR016C	2	F11
166	YFL008W	2	F12
167	YJR137C	2	G01
168	YER093C	2	G02
169	YCR042C	2	G03
170	YJR127C	2	G04
171	YGR061C	2	G05
172	YOL138C	2	G06
173	YDR217C	2	G07
174	YEL077C	2	G08
175	YMR128W	2	G09
176	YDR097C	2	G10
177	YJL074C	2	G11
178	YDR335W	2	G12
179	YDR326C	2	H01
180	YNL088W	2	H02
181	YML133C	2	H03
182	YGR270W	2	H04
183	YDR301W	2	H05
184	YBR081C	2	H06
185	YLR425W	2	H07
186	YMR012W	2	H08
187	YGL133W	2	H09
188	YNL091W	2	H10
189	YMR304W	2	H11
190	YOR151C	2	H12
191	YOR396W	3	A01
192	YML091C	3	A02
193	YOR086C	3	A03
194	YOL078W	3	A04
195	YJR151C	3	A05
196	YGR097W	3	A06
197	YOR188W	3	A07
198	YML104C	3	A08
199	YIL151C	3	A09
200	YER110C	3	A10
201	YPL216W	3	A11
202	YBR150C	3	A12
203	YPL110C	3	B01
204	YLR189C	3	B02
205	YNL106C	3	B03
206	YJL092W	3	B04
207	YGR070W	3	B05
208	YHL023C	3	B06
209	YML117W	3	B07
210	YHR077C	3	B08
211	YJR109C	3	B09
212	YBL063W	3	B10
213	YOL045W	3	B11
214	YER111C	3	B12
215	YLR084C	3	C01
216	YAR009C	3	C02
217	YJR041C	3	C04
218	YLR035C-A	3	C05
219	YLR410W	3	C06
220	YPR022C	3	C07
221	YDL231C	3	C08
222	YBL101C	3	C09
223	YNL163C	3	C10
224	YKL205W	3	C11
225	YOL034W	3	C12
226	YGL140C	3	D01
227	YPL226W	3	D02
228	YBR218C	3	D03
229	YFR031C	3	D04
230	YER013W	3	D06
231	YGL151W	3	D07
232	YGR134W	3	D08
233	YNR067C	3	D09
234	YBR059C	3	D10
235	YPL022W	3	D11
236	YDL215C	3	D12
237	YMR109W	3	E01
238	YKR096W	3	E02
239	YGL062W	3	E03
240	YKL038W	3	E04
241	YJR090C	3	E05
242	YDR507C	3	E06
243	YKL105C	3	E07
244	YER176W	3	E08
245	YNR065C	3	E09
246	YOR109W	3	E10
247	YKR028W	3	E11
248	YJR091C	3	E12
249	YPR026W	3	F01
250	YAL001C	3	F02
251	YGR233C	3	F03
252	YKR102W	3	F04
253	YIL026C	3	F05
254	YER129W	3	F06
255	YAL019W	3	F07
256	YJR039W	3	F08
257	YOL087C	3	F09
258	YGR094W	3	F10
259	YML100W	3	F11
260	YPL160W	3	F12
261	YPR122W	3	G01
262	YJL076W	3	G02
263	YPR049C	3	G03
264	YLR032W	3	G04
265	YOR207C	3	G05
266	YMR317W	3	G06
267	YBR245C	3	G07
268	YPR030W	3	G08
269	YGL094C	3	G09
270	YKL092C	3	G10
271	YMR308C	3	G12
272	YPR010C	3	H01
273	YEL025C	3	H02
274	YLR272C	3	H03
275	YHR158C	3	H04
276	YDR128W	3	H05
277	YGR170W	3	H06
278	YPL115C	3	H07
279	YOR304W	3	H08
280	YLR383W	3	H09
281	YMR218C	3	H10
282	YCL061C	3	H11
283	YMR196W	3	H12
284	YJR035W	4	A01
285	YHR102W	4	A02
286	YJL050W	4	A03
287	YGR274C	4	A04
288	YBL066C	4	A05
289	YCR092C	4	A06
290	YEL061C	4	A07
291	YMR189W	4	A08
292	YDR060W	4	A09
293	YDR028C	4	A10
294	YOR048C	4	A11
295	YDL031W	4	A12
296	YLR223C	4	B01
297	YHR119W	4	B02
298	YPR097W	4	B03
299	YNL267W	4	B04
300	YLR039C	4	B05
301	YDL223C	4	B06
302	YKL033W	4	B07
303	YIL128W	4	B08
304	YGR047C	4	B09
305	YIL125W	4	B10
306	YGL241W	4	B11
307	YIL169C	4	B12
308	YGR218W	4	C01
309	YDR291W	4	C02
310	YGL178W	4	C03
311	YML010W	4	C04
312	YNL132W	4	C05
313	YJL084C	4	C06
314	YPL009C	4	C07
315	YPR204W	4	C08
316	YKL210W	4	C09
317	YOR349W	4	C10
318	YAL035W	4	C11
319	YIL112W	4	D01
320	YOL145C	4	D02
321	YKL157W	4	D04
322	YMR261C	4	D05
323	YLR249W	4	D06
324	YCL024W	4	D07
325	YGR258C	4	D08
326	YEL055C	4	D09
327	YPL183C	4	D10
328	YPL040C	4	D11
329	YDR430C	4	D12
330	YPR115W	4	E01
331	YER033C	4	E02
332	YAL051W	4	E04
333	YDR325W	4	E05
334	YNL014W	4	E06
335	YOL098C	4	E07
336	YOL089C	4	E08
337	YGR188C	4	E09
338	YDR495C	4	E10
339	YOL021C	4	E11
340	YLR389C	4	E12
341	YLR071C	4	F01
342	YHR211W	4	F02
343	YKR086W	4	F03
344	YDR310C	4	F04
345	YDR017C	4	F05
346	YKL197C	4	F06
347	YPL075W	4	F07
348	YHR082C	4	F08
349	YDL240W	4	F09
350	YDR379W	4	F10
351	YNL123W	4	F11
352	YGR240C	4	F12
353	YOL051W	4	G01
354	YPR042C	4	G02
355	YNL278W	4	G04
356	YJR132W	4	G05
357	YNL327W	4	G06
358	YGL207W	4	G07
359	YLR187W	4	G08
360	YGL201C	4	G09
361	YKL173W	4	G10
362	YHR073W	4	G11
363	YOL100W	4	H01
364	YFL034W	4	H02
365	YGL013C	4	H03
366	YJL098W	4	H04
367	YLL016W	4	H05
368	YER114C	4	H06
369	YIL031W	4	H07
370	YBL037W	4	H08
371	YLL031C	4	H09
372	YOR127W	4	H10
373	YOR363C	4	H11
374	YDL073W	4	H12
375	YMR185W	5	A01
376	YNL236W	5	A02
377	YMR125W	5	A03
378	YMR086W	5	A04
379	YEL043W	5	A05
380	YMR019W	5	A06
381	YJL154C	5	A07
382	YGR089W	5	A08
383	YDR069C	5	A09
384	YKL050C	5	A10
385	YML065W	5	A11
386	YBR289W	5	A12
387	YBL085W	5	B01
388	YOR160W	5	B02
389	YOL155C	5	B03
390	YDR359C	5	B04
391	YGR140W	5	B05
392	YGR204W	5	B06
393	YML076C	5	B07
394	YPR104C	5	B08
395	YBL104C	5	B09
396	YIL017C	5	B10
397	YOR113W	5	B11
398	YFR040W	5	B12
399	YKL015W	5	C01
400	YEL032W	5	C02
401	YBR112C	5	C03
402	YHR120W	5	C04
403	YHL050C	5	C05
404	YIL002C	5	C06
405	YOR005C	5	C07
406	YJR061W	5	C08
407	YDR081C	5	C09
408	YML111W	5	C10
409	YDR213W	5	C11
410	YDR409W	5	C12
411	YLR442C	5	D01
412	YMR080C	5	D02
413	YNL023C	5	D03
414	YMR205C	5	D04
415	YJR089W	5	D05
416	YIL137C	5	D06
417	YLR129W	5	D07
418	YPR019W	5	D08
419	YER032W	5	D09
420	YBR017C	5	D10
421	YER151C	5	D11
422	YLR014C	5	D12
423	YBL005W	5	E01
424	YMR288W	5	E02
425	YBR079C	5	E03
426	YBR073W	5	E04
427	YNL127W	5	E05
428	YLL003W	5	E06
429	YMR124W	5	E07
430	YER075C	5	E08
431	YDR103W	5	E10
432	YGL141W	5	E11
433	YNL082W	5	E12
434	YMR275C	5	F01
435	YIL130W	5	F03
436	YGL227W	5	F04
437	YGR162W	5	F05
438	YIL075C	5	F06
439	YML109W	5	F07
440	YGR056W	5	F08
441	YDL220C	5	F09
442	YGL093W	5	F10
443	YKR089C	5	F11
444	YNL313C	5	F12
445	YBR084W	5	G01
446	YNL118C	5	G02
447	YOL090W	5	G03
448	YOR335C	5	G04
449	YDR421W	5	G05
450	YDR356W	5	G06
451	YHL007C	5	G07
452	YKL171W	5	G08
453	YCR057C	5	G09
454	YGL036W	5	G11
455	YPR160W	5	G12
456	YMR287C	5	H02
457	YDL190C	5	H03
458	YGR100W	5	H05
459	YDR395W	5	H06
460	YLR409C	5	H07
461	YPR135W	5	H08
462	YER024W	5	H09
463	YGL049C	5	H10
464	YLL026W	5	H11
465	YDL154W	5	H12
466	YDR006C	6	A01
467	YGL163C	6	A02
468	YDR096W	6	A03
469	YER070W	6	A04
470	YDR303C	6	A05
471	YPL248C	6	A06
472	YFL003C	6	A07
473	YDR089W	6	A08
474	YER069W	6	A09
475	YPR105C	6	A10
476	YJL165C	6	A11
477	YMR053C	6	A12
478	YPL150W	6	B01
479	YMR066W	6	B02
480	YLR382C	6	B03
481	YGL014W	6	B04
482	YOR058C	6	B05
483	YJL056C	6	B06
484	YDR186C	6	B07
485	YIL066C	6	B08
486	YKR064W	6	B09
487	YGR071C	6	B10
488	YAL041W	6	B11
489	YBR237W	6	B12
490	YBR225W	6	C01
491	YER047C	6	C02
492	YPL249C	6	C03
493	YJL070C	6	C04
494	YDR206W	6	C05
495	YLR386W	6	C06
496	YML034W	6	C07
497	YBL023C	6	C08
498	YLR001C	6	C09
499	YAR044W	6	C10
500	YDL040C	6	C11
501	YKR009C	6	D01
502	YGL180W	6	D02
503	YNR047W	6	D03
504	YLR045C	6	D04
505	YML099C	6	D06
506	YNR011C	6	D07
507	YPL174C	6	D08
508	YMR165C	6	D09
509	YDR416W	6	D10
510	YDR369C	6	D11
511	YPL105C	6	D12
512	YBR055C	6	E01
513	YOR371C	6	E02
514	YOR129C	6	E03
515	YPR112C	6	E04
516	YGR238C	6	E05
517	YNL112W	6	E06
518	YDR285W	6	E07
519	YPL141C	6	E08
520	YNL068C	6	E09
521	YLR115W	6	E10
522	YLR127C	6	E11
523	YBR108W	6	E12
524	YLR336C	6	F01
525	YDR074W	6	F02
526	YJR036C	6	F03
527	YIL073C	6	F04
528	YJL078C	6	F05
529	YLL013C	6	F06
530	YNL221C	6	F07
531	YGR150C	6	F08
532	YLR347C	6	F09
533	YML061C	6	F10
534	YKL121W	6	F11
535	YAL056W	6	F12
536	YML093W	6	G01
537	YPL126W	6	G02
538	YLR451W	6	G04
539	YKL073W	6	G05
540	YNL325C	6	G06
541	YOR038C	6	G07
542	YNL256W	6	G08
543	YOR217W	6	G09
544	YNL201C	6	G10
545	YER167W	6	G11
546	YNL126W	6	G12
547	YDR466W	6	H01
548	YLR357W	6	H03
549	YDL117W	6	H04
550	YOR141C	6	H05
551	YBR281C	6	H06
552	YCR030C	6	H07
553	YDR422C	6	H08
554	YPL008W	6	H09
555	YHR047C	6	H10
556	YOR373W	6	H11
557	YBR202W	6	H12
558	YPL084W	7	A01
559	YDR505C	7	A02
560	YAL021C	7	A03
561	YGL073W	7	A04
562	YNL085W	7	A05
563	YLL032C	7	A06
564	YJL187C	7	A07
565	YGR130C	7	A08
566	YKR099W	7	A09
567	YPL207W	7	A10
568	YMR049C	7	A11
569	YIL143C	7	B01
570	YBL008W	7	B02
571	YLL034C	7	B03
572	YCR106W	7	B04
573	YJL089W	7	B05
574	YPL032C	7	B06
575	YGL229C	7	B07
576	YLR176C	7	B09
577	YDL122W	7	B10
578	YER144C	7	B11
579	YOR233W	7	B12
580	YMR031C	7	C01
581	YHR131C	7	C02
582	YOR018W	7	C03
583	YFL024C	7	C04
584	YBR133C	7	C05
585	YHR205W	7	C06
586	YJR059W	7	C07
587	YBR049C	7	C09
588	YGL216W	7	C11
589	YCL030C	7	C12
590	YDR385W	7	D01
591	YDR207C	7	D03
592	YHR056C	7	D04
593	YIL107C	7	D05
594	YHR172W	7	D06
595	YOR322C	7	D07
596	YLR228C	7	D08
597	YDL148C	7	D09
598	YOR168W	7	D10
599	YGL083W	7	D11
600	YER109C	7	D12
601	YJL047C	7	E01
602	YKL022C	7	E02
603	YIL038C	7	E03
604	YPR029C	7	E04
605	YJL087C	7	E05
606	YJL051W	7	E06
607	YGR196C	7	E07
608	YLR095C	7	E08
609	YDR485C	7	E09
610	YBR058C	7	E11
611	YPL180W	7	E12
612	YNL298W	7	F01
613	YNL041C	7	F02
614	YDL126C	7	F03
615	YBL052C	7	F04
616	YLR263W	7	F05
617	YOR195W	7	F06
618	YGR198W	7	F07
619	YMR309C	7	F08
620	YIL095W	7	F09
621	YBR276C	7	F10
622	YLR182W	7	F11
623	YBR198C	7	F12
624	YOR133W	7	G01
625	YKR079C	7	G02
626	YMR102C	7	G03
627	YDR251W	7	G04
628	YPL153C	7	G06
629	YLR222C	7	G07
630	YDR258C	7	G08
631	YML035C	7	G09
632	YJL141C	7	G10
633	YGL139W	7	G11
634	YPL045W	7	G12
635	YCL054W	7	H01
636	YML029W	7	H02
637	YDL056W	7	H03
638	YJL157C	7	H04
639	YJL176C	7	H05
640	YJL102W	7	H06
641	YLR337C	7	H07
642	YJR126C	7	H08
643	YOR162C	7	H09
644	YLR352W	7	H10
645	YGL234W	7	H11
646	YBR284W	7	H12
647	YCR077C	8	A01
648	YBL113C	8	A02
649	YNL183C	8	A03
650	YNR033W	8	A04
651	YBR001C	8	A05
652	YFR038W	8	A06
653	YJL020C	8	A07
654	YOL006C	8	A08
655	YOR140W	8	A09
656	YOR361C	8	A10
657	YBL084C	8	A11
658	YDL164C	8	A12
659	YER169W	8	B01
660	YNL186W	8	B02
661	YJL200C	8	B03
662	YOR172W	8	B04
663	YLR304C	8	B06
664	YKR010C	8	B07
665	YER091C	8	B08
666	YKR027W	8	B09
667	YLR069C	8	B10
668	YJL206C	8	B11
669	YNL059C	8	B12
670	YFL023W	8	C01
671	YOR144C	8	C02
672	YOR035C	8	C03
673	YDR208W	8	C05
674	YDR324C	8	C06
675	YJL033W	8	C07
676	YGL120C	8	C08
677	YOL036W	8	C10
678	YKL034W	8	C11
679	YER098W	8	C12
680	YHR204W	8	D01
681	YOR353C	8	D02
682	YDL060W	8	D03
683	YGR237C	8	D04
684	YFL009W	8	D05
685	YOR165W	8	D06
686	YKL134C	8	D07
687	YGR245C	8	D08
688	YIR007W	8	D09
689	YOR112W	8	D10
690	YMR164C	8	D11
691	YER162C	8	D12
692	YOL076W	8	E01
693	YBR114W	8	E02
694	YGR200C	8	E03
695	YHR182W	8	E04
696	YGL009C	8	E05
697	YLR274W	8	E06
698	YLR131C	8	E07
699	YNL224C	8	E08
700	YJL090C	8	E09
701	YAL031C	8	E10
702	YMR179W	8	E11
703	YNL258C	8	E12
704	YER184C	8	F01
705	YBR172C	8	F02
706	YLR319C	8	F03
707	YMR016C	8	F04
708	YLR144C	8	F05
709	YML006C	8	F06
710	YPR091C	8	F07
711	YNL247W	8	F08
712	YLR114C	8	F09
713	YER041W	8	F10
714	YPL158C	8	F11
715	YPL074W	8	F12
716	YGR067C	8	G01
717	YDL239C	8	G02
718	YDR239C	8	G03
719	YPL176C	8	G04
720	YLR277C	8	G05
721	YBR142W	8	G06
722	YLL054C	8	G07
723	YDR490C	8	G08
724	YHR197W	8	G09
725	YOR267C	8	G10
726	YOR014W	8	G11
727	YBR094W	8	G12
728	YOR178C	8	H01
729	YDR034C	8	H02
730	YFR013W	8	H03
731	YGR250C	8	H04
732	YER171W	8	H05
733	YDR520C	8	H06
734	YMR167W	8	H07
735	YKL072W	8	H08
736	YNL311C	8	H09
737	YOR337W	8	H10
738	YNL161W	8	H11
739	YBR102C	8	H12
740	YDR138W	9	A01
741	YOR208W	9	A02
742	YDR499W	9	A03
743	YGR003W	9	A04
744	YLL019C	9	A05
745	YKL168C	9	A06
746	YJL082W	9	A07
747	YLR219W	9	A08
748	YMR237W	9	A09
749	YDL167C	9	A10
750	YPL164C	9	A11
751	YCL057W	9	A12
752	YFR009W	9	B01
753	YGL086W	9	B02
754	YOR076C	9	B03
755	YHR178W	9	B04
756	YPL029W	9	B05
757	YEL053C	9	B06
758	YKL112W	9	B07
759	YMR154C	9	B08
760	YDR333C	9	B09
761	YMR172W	9	B10
762	YFL047W	9	B11
763	YDR211W	9	B12
764	YLL008W	9	C01
765	YLL029W	9	C02
766	YDL234C	9	C03
767	YKR024C	9	C04
768	YBR007C	9	C05
769	YFR022W	9	C06
770	YER040W	9	C07
771	YKL135C	9	C08
772	YHR031C	9	C09
773	YKL104C	9	C10
774	YLR006C	9	C12
775	YDR001C	9	D01
776	YOR034C	9	D02
777	YJL099W	9	D03
778	YMR216C	9	D04
779	YPR090W	9	D05
780	YJL168C	9	D06
781	YLR149C	9	D07
782	YOR156C	9	D08
783	YGR178C	9	D09
784	YKR098C	9	D10
785	YOL017W	9	D11
786	YOL057W	9	D12
787	YGR264C	9	E01
788	YOR081C	9	E02
789	YOR080W	9	E03
790	YMR078C	9	E04
791	YGR186W	9	E05
792	YLR381W	9	E06
793	YOR019W	9	E07
794	YKR018C	9	E08
795	YIL091C	9	E09
796	YLR362W	9	E10
797	YAL054C	9	E11
798	YDR436W	9	E12
799	YKR029C	9	F01
800	YGL205W	9	F02
801	YOR299W	9	F03
802	YNL144C	9	F04
803	YKL078W	9	F05
804	YOR001W	9	F06
805	YPR141C	9	F07
806	YNR044W	9	F08
807	YCR091W	9	F09
808	YDR109C	9	F10
809	YCR084C	9	F11
810	YOR206W	9	F12
811	YJL132W	9	G01
812	YLR135W	9	G02
813	YCL039W	9	G03
814	YKL054C	9	G04
815	YHR149C	9	G05
816	YMR277W	9	G06
817	YBL097W	9	G07
818	YDR164C	9	G08
819	YLR335W	9	G09
820	YKL213C	9	G10
821	YGR128C	9	G11
822	YDR146C	9	G12
823	YKL187C	9	H01
824	YPR031W	9	H02
825	YJR030C	9	H03
826	YPR185W	9	H04
827	YIL078W	9	H05
828	YBR238C	9	H06
829	YJR119C	9	H07
830	YGL245W	9	H08
831	YMR192W	9	H09
832	YOR022C	9	H10
833	YHL024W	9	H11
834	YLR440C	10	A01
835	YKR090W	10	A02
836	YMR163C	10	A03
837	YAR014C	10	A04
838	YOR317W	10	A05
839	YIL108W	10	A06
840	YDR234W	10	A07
841	YPR175W	10	A08
842	YGR099W	10	A09
843	YLR117C	10	A10
844	YLR143W	10	A11
845	YEL023C	10	A12
846	YPL240C	10	B01
847	YMR006C	10	B02
848	YMR186W	10	B03
849	YDR176W	10	B04
850	YBR019C	10	B05
851	YLR035C	10	B06
852	YLR072W	10	B07
853	YIL144W	10	B08
854	YLR260W	10	B10
855	YOR249C	10	B11
856	YJL034W	10	B12
857	YDL176W	10	C01
858	YNL021W	10	C02
859	YBR131W	10	C03
860	YDR221W	10	C04
861	YDL214C	10	C05
862	YOL141W	10	C06
863	YPL106C	10	C07
864	YDL141W	10	C08
865	YHR084W	10	C09
866	YMR108W	10	C10
867	YPL043W	10	C11
868	YBR117C	10	C12
869	YFR015C	10	D01
870	YPL155C	10	D02
871	YDR052C	10	D03
872	YOR033C	10	D04
873	YLR233C	10	D05
874	YBR255W	10	D06
875	YGL071W	10	D08
876	YJR110W	10	D09
877	YIL105C	10	D10
878	YBL024W	10	D11
879	YKL126W	10	D12
880	YLR424W	10	E01
881	YBL035C	10	E02
882	YEL011W	10	E03
883	YGR266W	10	E04
884	YBR156C	10	E05
885	YIL009W	10	E06
886	YFL013C	10	E07
887	YDR332W	10	E08
888	YPL222W	10	E09
889	YLR047C	10	E10
890	YMR075W	10	E11
891	YPR007C	10	E12
892	YGL026C	10	F01
893	YKL222C	10	F02
894	YLR266C	10	F04
895	YDR108W	10	F05
896	YMR246W	10	F06
897	YML016C	10	F07
898	YBL067C	10	F08
899	YBL060W	10	F09
900	YLR399C	10	F10
901	YKL017C	10	F11
902	YPR074C	10	F12
903	YLR258W	10	G02
904	YMR037C	10	G03
905	YBL111C	10	G04
906	YLR452C	10	G05
907	YPR008W	10	G06
908	YMR224C	10	G07
909	YBR259W	10	G08
910	YDR444W	10	G09
911	YDR172W	10	G10
912	YLR153C	10	G11
913	YDR129C	10	G12
914	YJR134C	10	H01
915	YMR001C	10	H02
916	YOR365C	10	H03
917	YDL074C	10	H04
918	YPL116W	10	H05
919	YBR169C	10	H06
920	YOR354C	10	H07
921	YER077C	10	H08
922	YER022W	10	H09
923	YGL144C	10	H10
924	YLR403W	10	H11
925	YGL236C	10	H12
926	YHL029C	11	A01
927	YMR104C	11	A02
928	YDR452W	11	A03
929	YER088C	11	A04
930	YGL113W	11	A05
931	YLL007C	11	A06
932	YNR053C	11	A07
933	YOR275C	11	A08
934	YPL104W	11	A09
935	YNL047C	11	A10
936	YOR147W	11	A11
937	YBR123C	11	A12
938	YIR003W	11	B01
939	YMR232W	11	B02
940	YOR054C	11	B03
941	YLR427W	11	B04
942	YJL128C	11	B05
943	YDR194C	11	B06
944	YOR350C	11	B07
945	YLR299W	11	B08
946	YGL066W	11	B09
947	YJR098C	11	B10
948	YDR118W	11	B11
949	YDL224C	11	B12
950	YKL025C	11	C01
951	YBL009W	11	C02
952	YBR212W	11	C03
953	YML042W	11	C04
954	YML088W	11	C05
955	YML020W	11	C06
956	YAL048C	11	C07
957	YML056C	11	C08
958	YLR369W	11	C09
959	YOL113W	11	C10
960	YGR083C	11	C11
961	YIL155C	11	C12
962	YKL179C	11	D01
963	YOL023W	11	D02
964	YDR362C	11	D03
965	YKL029C	11	D04
966	YBR121C	11	D05
967	YDR307W	11	D07
968	YOL025W	11	D08
969	YPL023C	11	D09
970	YPR179C	11	D10
971	YLR429W	11	D11
972	YML082W	11	D12
973	YJL101C	11	E01
974	YOR243C	11	E02
975	YNL103W	11	E03
976	YMR032W	11	E04
977	YJL057C	11	E05
978	YDR137W	11	E06
979	YFR048W	11	E07
980	YER173W	11	E08
981	YPR161C	11	E09
982	YDR389W	11	E10
983	YPL263C	11	E11
984	YLR098C	11	E12
985	YKR101W	11	F01
986	YPL089C	11	F02
987	YLR330W	11	F03
988	YNL008C	11	F04
989	YBR260C	11	F05
990	YDR458C	11	F06
991	YMR137C	11	F07
992	YHR015W	11	F08
993	YDR496C	11	F09
994	YJL209W	11	F10
995	YLR103C	11	F11
996	YLR273C	11	F12
997	YNL027W	11	G01
998	YBR216C	11	G02
999	YNL045W	11	G03
1000	YBL051C	11	G04
1001	YEL007W	11	G05
1002	YJL149W	11	G06
1003	YNL197C	11	G07
1004	YKR036C	11	G08
1005	YKL079W	11	G09
1006	YML007W	11	G11
1007	YDL109C	11	G12
1008	YMR061W	11	H01
1009	YDR295C	11	H02
1010	YOR138C	11	H03
1011	YDR320C	11	H04
1012	YJL010C	11	H05
1013	YLR002C	11	H06
1014	YNR008W	11	H07
1015	YNL012W	11	H08
1016	YLR234W	11	H09
1017	YPR190C	11	H10
1018	YBL075C	11	H11
1019	YDR014W	11	H12
1020	YIL101C	12	A01
1021	YLR289W	12	A02
1022	YAL005C	12	A03
1023	YDL113C	12	A04
1024	YLL024C	12	A05
1025	YNL176C	12	A06
1026	YNL293W	12	A07
1027	YCR061W	12	A08
1028	YNR038W	12	A09
1029	YHR124W	12	A10
1030	YNL299W	12	A11
1031	YBR215W	12	A12
1032	YNL167C	12	B01
1033	YOL117W	12	B02
1034	YBR280C	12	B03
1035	YGL099W	12	B04
1036	YAL011W	12	B05
1037	YAL016W	12	B06
1038	YOR181W	12	B07
1039	YOR356W	12	B08
1040	YOL152W	12	B09
1041	YIL055C	12	B10
1042	YEL062W	12	B11
1043	YDL203C	12	B12
1044	YPL093W	12	C01
1045	YEL030W	12	C02
1046	YCR038C	12	C03
1047	YIL046W	12	C04
1048	YDL070W	12	C05
1049	YDR380W	12	C06
1050	YPL161C	12	C07
1051	YHL038C	12	C08
1052	YOR066W	12	C09
1053	YKL125W	12	C10
1054	YER147C	12	C11
1055	YFL049W	12	C12
1056	YPL253C	12	D01
1057	YER049W	12	D02
1058	YDR311W	12	D03
1059	YIL056W	12	D04
1060	YNL020C	12	D05
1061	YDR049W	12	D07
1062	YHR035W	12	D08
1063	YOR239W	12	D09
1064	YDR228C	12	D10
1065	YGL110C	12	D11
1066	YAL047C	12	D12
1067	YGL107C	12	E01
1068	YGL124C	12	E02
1069	YER103W	12	E03
1070	YJL127C	12	E04
1071	YHR161C	12	E05
1072	YGL023C	12	E06
1073	YDR386W	12	E07
1074	YIL014W	12	E08
1075	YHR166C	12	E10
1076	YHR219W	12	E11
1077	YGR221C	12	E12
1078	YOL164W	12	F01
1079	YPL269W	12	F02
1080	YGR054W	12	F03
1081	YKL048C	12	F04
1082	YOR070C	12	F05
1083	YDR477W	12	F06
1084	YDR419W	12	F07
1085	YKL062W	12	F08
1086	YKL155C	12	F09
1087	YDR425W	12	F10
1088	YMR119W	12	F11
1089	YHR206W	12	F12
1090	YPL210C	12	G01
1091	YDR398W	12	G02
1092	YMR313C	12	G03
1093	YDR266C	12	G04
1094	YDR390C	12	G05
1095	YHR114W	12	G06
1096	YKL204W	12	G07
1097	YML046W	12	G08
1098	YLR177W	12	G09
1099	YHL027W	12	G10
1100	YOR171C	12	G11
1101	YMR278W	12	G12
1102	YJL106W	12	H01
1103	YHR091C	12	H02
1104	YGL060W	12	H03
1105	YJR130C	12	H04
1106	YHR218W	12	H05
1107	YIL092W	12	H06
1108	YMR106C	12	H08
1109	YER080W	12	H09
1110	YOR389W	12	H11
1111	YNR006W	12	H12
1112	YOR137C	13	A01
1113	YKR056W	13	A03
1114	YLR206W	13	A04
1115	YDR350C	13	A05
1116	YHR188C	13	A06
1117	YMR168C	13	A07
1118	YGR103W	13	A08
1119	YOR204W	13	A09
1120	YGL192W	13	A10
1121	YKL032C	13	A11
1122	YMR198W	13	A12
1123	YAR007C	13	B01
1124	YMR100W	13	B02
1125	YPL119C	13	B03
1126	YNL209W	13	B04
1127	YFR023W	13	B05
1128	YLR248W	13	B06
1129	YDR341C	13	B07
1130	YIL072W	13	B08
1131	YCR008W	13	B09
1132	YGR194C	13	B10
1133	YDR144C	13	B11
1134	YNL039W	13	B12
1135	YPL020C	13	C01
1136	YDL013W	13	C02
1137	YGL142C	13	C03
1138	YMR098C	13	C04
1139	YJL181W	13	C05
1140	YBR148W	13	C06
1141	YJL100W	13	C07
1142	YDR200C	13	C08
1143	YLR353W	13	C09
1144	YGL125W	13	C10
1145	YDR349C	13	C11
1146	YDR101C	13	C12
1147	YBR060C	13	D01
1148	YNL104C	13	D02
1149	YNL018C	13	D04
1150	YKR084C	13	D05
1151	YDL080C	13	D06
1152	YML071C	13	D07
1153	YJL083W	13	D08
1154	YHR202W	13	D09
1155	YJL201W	13	D10
1156	YGR246C	13	D11
1157	YGR225W	13	D12
1158	YDL025C	13	E01
1159	YOR030W	13	E02
1160	YPR155C	13	E03
1161	YNL034W	13	E04
1162	YDL153C	13	E05
1163	YLR401C	13	E06
1164	YNR063W	13	E07
1165	YJR046W	13	E08
1166	YLR055C	13	E09
1167	YLR060W	13	E11
1168	YJR002W	13	E12
1169	YDL063C	13	F01
1170	YJL103C	13	F02
1171	YKR019C	13	F03
1172	YPL070W	13	F04
1173	YDR143C	13	F05
1174	YOL091W	13	F06
1175	YFL002C	13	F07
1176	YML057W	13	F08
1177	YMR284W	13	F09
1178	YPL243W	13	F10
1179	YJL069C	13	F11
1180	YKR069W	13	F12
1181	YDR085C	13	G01
1182	YNL061W	13	G02
1183	YMR092C	13	G03
1184	YPL184C	13	G04
1185	YER036C	13	G05
1186	YDR506C	13	G06
1187	YPL005W	13	G07
1188	YOL148C	13	G08
1189	YOR324C	13	G09
1190	YDL079C	13	G10
1191	YKL005C	13	G11
1192	YCR088W	13	G12
1193	YGR013W	13	H01
1194	YPR081C	13	H02
1195	YDL229W	13	H03
1196	YPL194W	13	H04
1197	YGL116W	13	H05
1198	YLR173W	13	H06
1199	YPR018W	13	H07
1200	YOR108W	13	H08
1201	YBR186W	13	H09
1202	YLR368W	13	H10
1203	YLR276C	13	H11
1204	YLR089C	13	H12
1205	YMR120C	14	A01
1206	YMR227C	14	A02
1207	YOR027W	14	A03
1208	YIL036W	14	A04
1209	YMR291W	14	A05
1210	YKR078W	14	A06
1211	YCL051W	14	A07
1212	YJL216C	14	A08
1213	YBL039C	14	A09
1214	YOR260W	14	A10
1215	YJL172W	14	A11
1216	YNL251C	14	A12
1217	YNL227C	14	B02
1218	YDR243C	14	B03
1219	YNL094W	14	B04
1220	YOL015W	14	B05
1221	YMR250W	14	B06
1222	YDL038C	14	B07
1223	YML127W	14	B08
1224	YHR150W	14	B09
1225	YDR463W	14	B10
1226	YLR196W	14	B11
1227	YPR006C	14	B12
1228	YFL053W	14	C01
1229	YOR073W	14	C02
1230	YGL252C	14	C03
1231	YNL218W	14	C04
1232	YBR163W	14	C05
1233	YBR299W	14	C06
1234	YKL012W	14	C07
1235	YNL225C	14	C08
1236	YHR194W	14	C09
1237	YER165W	14	C10
1238	YNL073W	14	C11
1239	YLR028C	14	D01
1240	YDR294C	14	D02
1241	YKL185W	14	D03
1242	YOR154W	14	D04
1243	YHL010C	14	D05
1244	YGR292W	14	D06
1245	YLR077W	14	D07
1246	YOL153C	14	D08
1247	YKL124W	14	D09
1248	YGL228W	14	D10
1249	YPR171W	14	D11
1250	YJR053W	14	D12
1251	YML054C	14	E01
1252	YGR287C	14	E02
1253	YPL007C	14	E03
1254	YOR308C	14	E04
1255	YHL039W	14	E05
1256	YML013W	14	E06
1257	YPL208W	14	E07
1258	YAL040C	14	E08
1259	YPR083W	14	E09
1260	YGR278W	14	E10
1261	YGR171C	14	E11
1262	YBR045C	14	E12
1263	YNL308C	14	F01
1264	YIL172C	14	F02
1265	YDL174C	14	F03
1266	YDL227C	14	F04
1267	YHR108W	14	F05
1268	YML070W	14	F06
1269	YCR014C	14	F07
1270	YBR170C	14	F08
1271	YBR078W	14	F09
1272	YER086W	14	F10
1273	YHR037W	14	F11
1274	YER124C	14	F12
1275	YOL066C	14	G01
1276	YJL221C	14	G02
1277	YER068W	14	G03
1278	YGR068C	14	G04
1279	YHR109W	14	G05
1280	YNL076W	14	G06
1281	YDR440W	14	G07
1282	YMR282C	14	G08
1283	YLR361C	14	G09
1284	YER087W	14	G10
1285	YHR196W	14	G11
1286	YER158C	14	G12
1287	YMR213W	14	H01
1288	YOL157C	14	H02
1289	YIL015W	14	H03
1290	YJL186W	14	H04
1291	YJR016C	14	H05
1292	YOL115W	14	H06
1293	YLR133W	14	H07
1294	YNR059W	14	H08
1295	YML017W	14	H09
1296	YIR010W	14	H10
1297	YLL058W	14	H11
1298	YGR088W	14	H12
1299	YLL012W	15	A01
1300	YPR121W	15	A02
1301	YGL160W	15	A03
1302	YKR002W	15	A04
1303	YLR417W	15	A05
1304	YCR065W	15	A06
1305	YLR134W	15	A07
1306	YEL020C	15	A08
1307	YDR212W	15	A09
1308	YLL018C	15	A10
1309	YJL153C	15	A11
1310	YOL027C	15	B01
1311	YPR145W	15	B02
1312	YKL127W	15	B03
1313	YKR015C	15	B04
1314	YNR023W	15	B05
1315	YGL171W	15	B06
1316	YDL042C	15	B07
1317	YGL179C	15	B08
1318	YGL244W	15	B09
1319	YPL086C	15	B10
1320	YLR343W	15	B11
1321	YIR031C	15	B12
1322	YPR137W	15	C01
1323	YHR184W	15	C02
1324	YLR267W	15	C03
1325	YOR118W	15	C04
1326	YOR023C	15	C05
1327	YJR103W	15	C06
1328	YDR261C	15	C07
1329	YGR166W	15	C08
1330	YGL257C	15	C09
1331	YDR131C	15	C10
1332	YNL182C	15	C11
1333	YKL109W	15	C12
1334	YGR092W	15	D01
1335	YIL150C	15	D02
1336	YLR120C	15	D03
1337	YPL030W	15	D04
1338	YPR070W	15	D05
1339	YPR111W	15	D06
1340	YJR064W	15	D07
1341	YJL105W	15	D08
1342	YNL193W	15	D09
1343	YER140W	15	D10
1344	YMR036C	15	D12
1345	YGR124W	15	E01
1346	YKL088W	15	E02
1347	YLR253W	15	E03
1348	YCL036W	15	E04
1349	YBR263W	15	E05
1350	YBR286W	15	E06
1351	YKR072C	15	E07
1352	YMR136W	15	E08
1353	YDR358W	15	E09
1354	YML023C	15	E10
1355	YBR196C	15	E11
1356	YNL117W	15	E12
1357	YHR064C	15	F01
1358	YOR128C	15	F02
1359	YMR105C	15	F03
1360	YDL003W	15	F04
1361	YDR117C	15	F05
1362	YCR054C	15	F06
1363	YLR286C	15	F07
1364	YMR145C	15	F08
1365	YEL058W	15	F09
1366	YOR205C	15	F10
1367	YDR479C	15	F11
1368	YOR372C	15	F12
1369	YLR259C	15	G01
1370	YDR026C	15	G02
1371	YGR241C	15	G03
1372	YDR110W	15	G04
1373	YJR052W	15	G05
1374	YGR087C	15	G06
1375	YPL128C	15	G07
1376	YPR072W	15	G08
1377	YER065C	15	G09
1378	YDR474C	15	G10
1379	YER082C	15	G11
1380	YGL076C	15	G12
1381	YOR090C	15	H01
1382	YDR120C	15	H02
1383	YJL008C	15	H03
1384	YGL003C	15	H04
1385	YOR386W	15	H05
1386	YLR044C	15	H06
1387	YGL064C	15	H07
1388	YDL106C	15	H08
1389	YFR037C	15	H09
1390	YFL042C	15	H10
1391	YGL176C	15	H11
1392	YGR276C	15	H12
1393	YLR433C	16	A01
1394	YEL015W	16	A02
1395	YJL111W	16	A03
1396	YPL228W	16	A04
1397	YMR199W	16	A05
1398	YDR235W	16	A06
1399	YGL028C	16	A07
1400	YDR061W	16	A08
1401	YOL033W	16	A09
1402	YJL014W	16	A10
1403	YMR110C	16	A11
1404	YBR239C	16	A12
1405	YMR258C	16	B01
1406	YFR028C	16	B02
1407	YMR171C	16	B03
1408	YDR232W	16	B04
1409	YOR380W	16	B05
1410	YOR002W	16	B06
1411	YNL189W	16	B07
1412	YDR145W	16	B08
1413	YBR103W	16	B09
1414	YKL191W	16	B10
1415	YMR297W	16	B11
1416	YIL146C	16	B12
1417	YBR030W	16	C01
1418	YGR023W	16	C02
1419	YBR158W	16	C03
1420	YER054C	16	C04
1421	YPR033C	16	C05
1422	YPL212C	16	C06
1423	YNL249C	16	C07
1424	YJR003C	16	C08
1425	YFR006W	16	C09
1426	YNL199C	16	C10
1427	YDL020C	16	C11
1428	YPR162C	16	C12
1429	YBR248C	16	D01
1430	YJL110C	16	D02
1431	YDR242W	16	D03
1432	YKL140W	16	D04
1433	YBR270C	16	D05
1434	YBL080C	16	D07
1435	YIL045W	16	D08
1436	YOL123W	16	D10
1437	YDL030W	16	D11
1438	YAL028W	16	D12
1439	YML069W	16	E01
1440	YKR017C	16	E02
1441	YOR241W	16	E04
1442	YDL085W	16	E05
1443	YJL058C	16	E06
1444	YHR006W	16	E07
1445	YLR020C	16	E08
1446	YML115C	16	E09
1447	YDR195W	16	E10
1448	YDL178W	16	E11
1449	YBR020W	16	E12
1450	YPR144C	16	F01
1451	YOL055C	16	F02
1452	YKL089W	16	F03
1453	YGR041W	16	F04
1454	YPL256C	16	F05
1455	YLR023C	16	F06
1456	YPR088C	16	F07
1457	YMR015C	16	F08
1458	YDR147W	16	F09
1459	YDR488C	16	F10
1460	YJR049C	16	F11
1461	YDL143W	16	F12
1462	YBR200W	16	G01
1463	YPL258C	16	G02
1464	YKR097W	16	G03
1465	YDR188W	16	G04
1466	YML124C	16	G05
1467	YPL109C	16	G06
1468	YKR016W	16	G07
1469	YIR039C	16	G08
1470	YDR299W	16	G09
1471	YNL294C	16	G10
1472	YKR023W	16	G11
1473	YDL170W	16	G12
1474	YDL225W	16	H01
1475	YPL260W	16	H02
1476	YPL179W	16	H03
1477	YER168C	16	H04
1478	YBR223C	16	H05
1479	YDR057W	16	H06
1480	YPL214C	16	H07
1481	YDR403W	16	H08
1482	YDR434W	16	H09
1483	YIL162W	16	H10
1484	YLR313C	16	H11
1485	YDR534C	16	H12
1486	YKL045W	17	A01
1487	YIL142W	17	A02
1488	YNL138W	17	A03
1489	YOR359W	17	A06
1490	YBL019W	17	A07
1491	YER007W	17	A08
1492	YIL097W	17	A09
1493	YJL013C	17	A10
1494	YDL101C	17	A11
1495	YMR093W	17	A12
1496	YKL139W	17	B01
1497	YKL074C	17	B02
1498	YOR360C	17	B03
1499	YOR377W	17	B04
1500	YGL078C	17	B05
1501	YPL247C	17	B06
1502	YBR227C	17	B07
1503	YHR170W	17	B08
1504	YKL047W	17	B09
1505	YMR285C	17	B10
1506	YDR169C	17	B11
1507	YMR283C	17	B12
1508	YNL077W	17	C01
1509	YBL015W	17	C02
1510	YBL054W	17	C03
1511	YBR138C	17	C04
1512	YHR009C	17	C05
1513	YDR009W	17	C07
1514	YKL116C	17	C08
1515	YOR149C	17	C09
1516	YNR051C	17	C10
1517	YGR123C	17	C11
1518	YPL122C	17	C12
1519	YBR214W	17	D01
1520	YGL190C	17	D02
1521	YBR028C	17	D03
1522	YHR016C	17	D04
1523	YHR086W	17	D05
1524	YDL156W	17	D06
1525	YER006W	17	D07
1526	YLR392C	17	D08
1527	YPL198W	17	D09
1528	YCR053W	17	D10
1529	YHR137W	17	D11
1530	YER096W	17	D12
1531	YBR274W	17	E01
1532	YHR151C	17	E02
1533	YDL197C	17	E03
1534	YMR215W	17	E04
1535	YHR216W	17	E05
1536	YNL116W	17	E06
1537	YER073W	17	E07
1538	YMR064W	17	E08
1539	YPR002W	17	E09
1540	YJL025W	17	E10
1541	YIL001W	17	E11
1542	YGL158W	17	E12
1543	YER025W	17	F01
1544	YHR207C	17	F02
1545	YGL122C	17	F03
1546	YNL295W	17	F04
1547	YLR324W	17	F05
1548	YOR355W	17	F06
1549	YLR314C	17	F07
1550	YDR518W	17	F08
1551	YKL103C	17	F10
1552	YJL194W	17	F11
1553	YGR059W	17	F12
1554	YER052C	17	G01
1555	YML086C	17	G02
1556	YGR227W	17	G03
1557	YBR184W	17	G04
1558	YLR432W	17	G05
1559	YDR501W	17	G06
1560	YMR014W	17	G07
1561	YPL272C	17	G08
1562	YDL159W	17	G09
1563	YMR018W	17	G10
1564	YML120C	17	G11
1565	YLR054C	17	G12
1566	YGL056C	17	H01
1567	YMR023C	17	H02
1568	YML096W	17	H03
1569	YBR250W	17	H04
1570	YMR029C	17	H05
1571	YKL081W	17	H06
1572	YOR374W	17	H07
1573	YGL112C	17	H08
1574	YDR256C	17	H09
1575	YPR169W	17	H10
1576	YML128C	17	H11
1577	YDR371W	17	H12
1578	YER078C	18	A01
1579	YMR300C	18	A02
1580	YDR111C	18	A03
1581	YDR030C	18	A04
1582	YGR229C	18	A05
1583	YML032C	18	A06
1584	YEL070W	18	A07
1585	YJR051W	18	A08
1586	YDR516C	18	A09
1587	YHR168W	18	A10
1588	YOR351C	18	A11
1589	YJR010W	18	B01
1590	YEL052W	18	B02
1591	YER090W	18	B03
1592	YDR168W	18	B04
1593	YLR015W	18	B05
1594	YDR539W	18	B06
1595	YMR115W	18	B08
1596	YFR021W	18	B09
1597	YKL035W	18	B10
1598	YEL071W	18	B11
1599	YDR257C	18	B12
1600	YMR131C	18	C01
1601	YLR345W	18	C02
1602	YGR093W	18	C03
1603	YMR169C	18	C04
1604	YML118W	18	C05
1605	YFL022C	18	C06
1606	YLR033W	18	C07
1607	YNR012W	18	C08
1608	YGL202W	18	C09
1609	YPL017C	18	C10
1610	YOL061W	18	C11
1611	YGR091W	18	C12
1612	YOR310C	18	D01
1613	YBR139W	18	D02
1614	YGR155W	18	D03
1615	YMR170C	18	D04
1616	YMR290C	18	D05
1617	YGL017W	18	D06
1618	YLR094C	18	D07
1619	YOL070C	18	D08
1620	YPL061W	18	D09
1621	YPL072W	18	D10
1622	YPL100W	18	D11
1623	YOR269W	18	D12
1624	YFL021W	18	E01
1625	YLR121C	18	E02
1626	YGR189C	18	E03
1627	YNL223W	18	E04
1628	YNL241C	18	E05
1629	YGL065C	18	E06
1630	YNR073C	18	E07
1631	YAL038W	18	E08
1632	YDR348C	18	E09
1633	YBR006W	18	E10
1634	YMR033W	18	E11
1635	YPL204W	18	E12
1636	YFR039C	18	F01
1637	YMR020W	18	F02
1638	YIL104C	18	F03
1639	YOR347C	18	F04
1640	YGL035C	18	F05
1641	YLL036C	18	F06
1642	YPL026C	18	F07
1643	YCL040W	18	F08
1644	YFL018C	18	F09
1645	YCL017C	18	F10
1646	YBR126C	18	F11
1647	YEL016C	18	F12
1648	YJR015W	18	G01
1649	YOR231W	18	G02
1650	YML043C	18	G03
1651	YPL140C	18	G04
1652	YHR159W	18	G05
1653	YOL068C	18	G06
1654	YBR056W	18	G07
1655	YDR036C	18	G08
1656	YFR010W	18	G09
1657	YFL027C	18	G10
1658	YDR132C	18	G11
1659	YER122C	18	G12
1660	YML114C	18	H01
1661	YDL017W	18	H02
1662	YDL160C	18	H03
1663	YPL181W	18	H04
1664	YLR197W	18	H05
1665	YDR522C	18	H06
1666	YGL119W	18	H07
1667	YDR330W	18	H08
1668	YHR070W	18	H09
1669	YJR122W	18	H10
1670	YEL041W	18	H11
1671	YHL012W	18	H12
1672	YLR227C	19	A01
1673	YPL097W	19	A02
1674	YOL049W	19	A03
1675	YDL238C	19	A04
1676	YNL053W	19	A05
1677	YPL277C	19	A06
1678	YOR043W	19	A07
1679	YKL211C	19	A08
1680	YCR052W	19	A09
1681	YHR024C	19	A10
1682	YDR381W	19	A11
1683	YGR255C	19	A12
1684	YNL119W	19	B01
1685	YPL219W	19	B02
1686	YPR119W	19	B03
1687	YDR402C	19	B04
1688	YNR069C	19	B05
1689	YBL103C	19	B06
1690	YPR001W	19	B07
1691	YNL026W	19	B08
1692	YDR514C	19	B09
1693	YJL162C	19	B10
1694	YDR181C	19	B11
1695	YNL261W	19	B12
1696	YCR024C	19	C01
1697	YCR045C	19	C02
1698	YFR024C-A	19	C03
1699	YER045C	19	C04
1700	YPL254W	19	C05
1701	YBR083W	19	C06
1702	YML085C	19	C07
1703	YOL030W	19	C08
1704	YLR175W	19	C09
1705	YKL028W	19	C10
1706	YDR346C	19	C11
1707	YNR001C	19	C12
1708	YDR240C	19	D01
1709	YDL146W	19	D02
1710	YDL048C	19	D03
1711	YHR183W	19	D04
1712	YPL262W	19	D05
1713	YER141W	19	D06
1714	YFR053C	19	D07
1715	YOL144W	19	D08
1716	YNL239W	19	D09
1717	YFR044C	19	D11
1718	YOR298W	19	D12
1719	YER051W	19	E01
1720	YDR182W	19	E02
1721	YDR523C	19	E03
1722	YJL081C	19	E04
1723	YCR066W	19	E05
1724	YGL253W	19	E06
1725	YLR108C	19	E07
1726	YOR119C	19	E08
1727	YPL091W	19	E09
1728	YLR394W	19	E10
1729	YBR272C	19	E11
1730	YPL066W	19	E12
1731	YGR256W	19	F01
1732	YLR190W	19	F02
1733	YHR113W	19	F03
1734	YLL011W	19	F04
1735	YGR211W	19	F06
1736	YDL089W	19	F07
1737	YOR216C	19	F08
1738	YDR388W	19	F09
1739	YNL071W	19	F10
1740	YKR058W	19	F11
1741	YDR306C	19	F12
1742	YNL124W	19	G01
1743	YML126C	19	G02
1744	YMR070W	19	G03
1745	YLR183C	19	G04
1746	YJR006W	19	G05
1747	YNL137C	19	G06
1748	YHR030C	19	G07
1749	YBR247C	19	G08
1750	YDR524C	19	G09
1751	YOR046C	19	G10
1752	YNR058W	19	G11
1753	YJL123C	19	G12
1754	YOL112W	19	H01
1755	YNL240C	19	H02
1756	YNL022C	19	H03
1757	YMR140W	19	H04
1758	YOR009W	19	H05
1759	YNL277W	19	H06
1760	YIL131C	19	H07
1761	YBR288C	19	H08
1762	YGL097W	19	H09
1763	YOR088W	19	H10
1764	YDR198C	19	H11
1765	YLR238W	19	H12
1766	YGR002C	20	A02
1767	YMR211W	20	A03
1768	YLR212C	20	A04
1769	YOL132W	20	A05
1770	YDR473C	20	A06
1771	YGR212W	20	A07
1772	YGR141W	20	A08
1773	YCL037C	20	A09
1774	YOR177C	20	A11
1775	YDL036C	20	A12
1776	YNL062C	20	B01
1777	YGR117C	20	B02
1778	YLL063C	20	B03
1779	YBR098W	20	B04
1780	YPL235W	20	B05
1781	YER081W	20	B06
1782	YML102W	20	B07
1783	YHR215W	20	B08
1784	YKL184W	20	B09
1785	YPR152C	20	B10
1786	YAL034C	20	B11
1787	YDR023W	20	B12
1788	YOR003W	20	C01
1789	YLR116W	20	C02
1790	YLR288C	20	C03
1791	YDR316W	20	C04
1792	YEL047C	20	C05
1793	YIL074C	20	C06
1794	YPL103C	20	C07
1795	YKL145W	20	C08
1796	YDR219C	20	C09
1797	YPR178W	20	C10
1798	YDR148C	20	C11
1799	YGR004W	20	C12
1800	YLR142W	20	D02
1801	YPR047W	20	D03
1802	YGR019W	20	D04
1803	YMR027W	20	D05
1804	YJL146W	20	D06
1805	YAR071W	20	D07
1806	YOR229W	20	D08
1807	YFL052W	20	D09
1808	YER038C	20	D10
1809	YDR190C	20	D11
1810	YKL194C	20	D12
1811	YDL103C	20	E01
1812	YOL125W	20	E02
1813	YDR105C	20	E03
1814	YGR108W	20	E04
1815	YOR198C	20	E05
1816	YLR058C	20	E06
1817	YBR092C	20	E07
1818	YPL083C	20	E08
1819	YGL184C	20	E09
1820	YER089C	20	E10
1821	YGL111W	20	E11
1822	YLR163C	20	E12
1823	YER019W	20	F01
1824	YPL063W	20	F02
1825	YGR288W	20	F03
1826	YHR036W	20	F04
1827	YPR045C	20	F05
1828	YBL056W	20	F06
1829	YBR093C	20	F07
1830	YPR157W	20	F08
1831	YGL256W	20	F09
1832	YML068W	20	F10
1833	YHR018C	20	F11
1834	YML005W	20	F12
1835	YLR341W	20	G01
1836	YIL123W	20	G02
1837	YIL039W	20	G03
1838	YMR223W	20	G04
1839	YPR068C	20	G05
1840	YBR297W	20	G06
1841	YDR223W	20	G07
1842	YMR133W	20	G08
1843	YHL021C	20	G09
1844	YMR293C	20	G10
1845	YKL133C	20	G11
1846	YMR111C	20	G12
1847	YPR034W	20	H01
1848	YMR239C	20	H04
1849	YPR196W	20	H05
1850	YDL024C	20	H06
1851	YEL040W	20	H07
1852	YBL086C	20	H08
1853	YHR146W	20	H09
1854	YOR123C	20	H10
1855	YKL143W	20	H11
1856	YPL003W	20	H12
1857	YDR247W	21	A01
1858	YIR027C	21	A02
1859	YOL041C	21	A03
1860	YOR166C	21	A04
1861	YDR393W	21	A05
1862	YDL091C	21	A06
1863	YDL161W	21	A07
1864	YHR066W	21	A08
1865	YBR166C	21	A09
1866	YBR177C	21	A10
1867	YBR240C	21	A11
1868	YKL046C	21	A12
1869	YLR005W	21	B01
1870	YLR210W	21	B02
1871	YOR056C	21	B03
1872	YPR080W	21	B04
1873	YGR249W	21	B05
1874	YDL216C	21	B06
1875	YOR375C	21	B07
1876	YHR177W	21	B08
1877	YBR182C	21	B09
1878	YJL046W	21	B10
1879	YJL049W	21	B11
1880	YMR210W	21	B12
1881	YMR265C	21	C01
1882	YOR272W	21	C02
1883	YBL082C	21	C03
1884	YAL062W	21	C04
1885	YNL040W	21	C05
1886	YDR364C	21	C06
1887	YPL245W	21	C07
1888	YJR078W	21	C08
1889	YGL194C	21	C09
1890	YKL106W	21	C10
1891	YKL075C	21	C11
1892	YFR005C	21	C12
1893	YPL201C	21	D01
1894	YPL139C	21	D02
1895	YBR118W	21	D03
1896	YDL189W	21	D04
1897	YOR323C	21	D05
1898	YLR195C	21	D06
1899	YPR125W	21	D07
1900	YKL108W	21	D08
1901	YGL215W	21	D09
1902	YML097C	21	D10
1903	YKR042W	21	D11
1904	YGR223C	21	D12
1905	YGL130W	21	E02
1906	YDL233W	21	E03
1907	YFL037W	21	E04
1908	YPL095C	21	E05
1909	YMR135C	21	E06
1910	YBR095C	21	E07
1911	YLR231C	21	E08
1912	YHL002W	21	E09
1913	YMR220W	21	E10
1914	YOR059C	21	E11
1915	YKR003W	21	E12
1916	YCR005C	21	F01
1917	YGL219C	21	F02
1918	YDR254W	21	F03
1919	YJR062C	21	F04
1920	YPL101W	21	F05
1921	YNL206C	21	F06
1922	YDR125C	21	F07
1923	YLR431C	21	F08
1924	YJL155C	21	F09
1925	YOL069W	21	F10
1926	YOR155C	21	F11
1927	YLR300W	21	F12
1928	YDR004W	21	G01
1929	YLR090W	21	G02
1930	YJL044C	21	G03
1931	YMR209C	21	G04
1932	YPR084W	21	G05
1933	YOL072W	21	G06
1934	YDR229W	21	G07
1935	YNL016W	21	G08
1936	YNL074C	21	G09
1937	YOR221C	21	G10
1938	YER043C	21	G11
1939	YNL166C	21	G12
1940	YER003C	21	H01
1941	YNL309W	21	H02
1942	YMR191W	21	H03
1943	YDR363W	21	H04
1944	YBR162C	21	H05
1945	YPL146C	21	H06
1946	YDR312W	21	H07
1947	YOR197W	21	H08
1948	YPL049C	21	H09
1949	YPL151C	21	H10
1950	YPR085C	21	H12
1951	YDR515W	22	A01
1952	YHR011W	22	A02
1953	YOR244W	22	A03
1954	YMR268C	22	A04
1955	YMR208W	22	A05
1956	YMR062C	22	A06
1957	YOL059W	22	A07
1958	YGR254W	22	A08
1959	YPL281C	22	A09
1960	YPR163C	22	A10
1961	YPR120C	22	A11
1962	YOR117W	22	A12
1963	YKL027W	22	B01
1964	YNR050C	22	B02
1965	YOR250C	22	B03
1966	YNL011C	22	B04
1967	YPR106W	22	B05
1968	YCL029C	22	B06
1969	YDR527W	22	B07
1970	YHR001W	22	B08
1971	YBR236C	22	B09
1972	YAR018C	22	B10
1973	YPR148C	22	B11
1974	YOR237W	22	B12
1975	YKR005C	22	C01
1976	YPL133C	22	C02
1977	YDR055W	22	C03
1978	YOR047C	22	C04
1979	YCR079W	22	C05
1980	YDL044C	22	C06
1981	YGR252W	22	C07
1982	YHR174W	22	C08
1983	YBR273C	22	C09
1984	YHR118C	22	C10
1985	YDL097C	22	C11
1986	YPL123C	22	C12
1987	YOL016C	22	D01
1988	YBR279W	22	D02
1989	YDR165W	22	D03
1990	YER130C	22	D04
1991	YDR370C	22	D05
1992	YDL131W	22	D06
1993	YLR085C	22	D07
1994	YMR323W	22	D08
1995	YIL135C	22	D09
1996	YLR113W	22	D10
1997	YDR448W	22	D11
1998	YPL145C	22	D12
[truncated: 3,958 more rows]
