# Supplementary material for: Global analysis of protein homomerization in Saccharomyces cerevisiae
Source: HighWire-hosted journal article supplement (doi:10.1101/gr.231860.117), 2018-12-19
Supplement: Supplemental_Tables.zip [file Supplemental_Table_S3.xlsx]

## Sheet: mating typa alpha strains
Supplemental Table S3. List of the MATa VC fusion library strains.
No.	ORF	Plate	Coordinate
1	YLR106C	1	A01
2	YLR454W	1	A02
3	YJL130C	1	A03
4	YKL182W	1	A04
5	YNL339C	1	A05
6	YBR208C	1	A06
7	YNL172W	1	A07
8	YOR341W	1	A08
9	YOR326W	1	A10
10	YGL173C	1	A11
11	YDR180W	1	A12
12	YKR054C	1	B01
13	YPR117W	1	B02
14	YPL085W	1	B03
15	YJL207C	1	B04
16	YLR305C	1	B05
17	YDR545W	1	B06
18	YDL140C	1	B07
19	YDR283C	1	B08
20	YOR191W	1	B09
21	YMR247C	1	B10
22	YHR164C	1	B11
23	YGL150C	1	B12
24	YHR099W	1	C01
25	YHR165C	1	C02
26	YGR271W	1	C04
27	YIL177C	1	C05
28	YLR467W	1	C06
29	YMR229C	1	C07
30	YMR219W	1	C08
31	YCR089W	1	C09
32	YKL101W	1	C11
33	YGL197W	1	C12
34	YIL129C	1	D02
35	YER155C	1	D03
36	YNL271C	1	D04
37	YJL225C	1	D05
38	YMR306W	1	D06
39	YOR290C	1	D07
40	YGL206C	1	D08
41	YNL139C	1	D09
42	YLR247C	1	D10
43	YDR334W	1	D11
44	YKL010C	1	D12
45	YLR087C	1	E01
46	YFR019W	1	E02
47	YER172C	1	E03
48	YGR184C	1	E04
49	YPL231W	1	E05
50	YFL033C	1	E06
51	YDR141C	1	E07
52	YJR140C	1	E08
53	YNL242W	1	E09
54	YML072C	1	E10
55	YBL034C	1	E11
56	YJL095W	1	E12
57	YDL171C	1	F03
58	YLR422W	1	F04
59	YLR024C	1	F05
60	YJL109C	1	F06
61	YKR031C	1	F07
62	YOR093C	1	F08
63	YDR127W	1	F09
64	YPL167C	1	F11
65	YAL029C	1	F12
66	YDR150W	1	G01
67	YLR430W	1	G02
68	YMR207C	1	G03
69	YHR023W	1	G04
70	YHL030W	1	G05
71	YKL014C	1	G06
72	YER190W	1	G07
73	YCL014W	1	G08
74	YJR138W	1	G09
75	YOL004W	1	G10
76	YLR256W	1	G11
77	YER164W	1	G12
78	YGL195W	1	H01
79	YNL262W	1	H02
80	YBR275C	1	H04
81	YPL082C	1	H05
82	YNL297C	1	H08
83	YNR031C	1	H09
84	YPR184W	1	H10
85	YPL242C	1	H11
86	YNL102W	1	H12
87	YLL021W	2	A01
88	YDL112W	2	A02
89	YCR081W	2	A03
90	YPR164W	2	A04
91	YIL159W	2	A05
92	YAL017W	2	A06
93	YCR073C	2	A07
94	YDR159W	2	A08
95	YMR076C	2	A09
96	YLL066C	2	A11
97	YNL257C	2	A12
98	YOR116C	2	B01
99	YAL024C	2	B02
100	YDR443C	2	B03
101	YGL131C	2	B04
102	YIR019C	2	B05
103	YLR371W	2	B06
104	YDR216W	2	B07
105	YOR296W	2	B08
106	YPL137C	2	B09
107	YML081W	2	B10
108	YLL067C	2	B11
109	YEL022W	2	C01
110	YDR464W	2	C02
111	YMR259C	2	C03
112	YJL042W	2	C04
113	YOR336W	2	C05
114	YFL036W	2	C06
115	YAL063C	2	C07
116	YLR398C	2	C08
117	YLR436C	2	C09
118	YDR293C	2	C10
119	YNL273W	2	C11
120	YLR320W	2	D01
121	YLR419W	2	D02
122	YLR086W	2	D03
123	YBR115C	2	D04
124	YML049C	2	D05
125	YLR384C	2	D06
126	YJR092W	2	D07
127	YKL215C	2	D08
128	YDL195W	2	D09
129	YOR227W	2	D10
130	YGL251C	2	D11
131	YCR033W	2	D12
132	YGR116W	2	E01
133	YMR280C	2	E02
134	YMR176W	2	E03
135	YLR466W	2	E04
136	YIL126W	2	E05
137	YHR080C	2	E06
138	YPL016W	2	E07
139	YDL019C	2	E08
140	YOR124C	2	E09
141	YDR104C	2	E10
142	YMR190C	2	F01
143	YPR189W	2	F02
144	YJR031C	2	F03
145	YBL047C	2	F04
146	YDR227W	2	F05
147	YLR278C	2	F06
148	YNL250W	2	F07
149	YOR330C	2	F08
150	YKL129C	2	F09
151	YBL007C	2	F10
152	YFR016C	2	F11
153	YFL008W	2	F12
154	YJR137C	2	G01
155	YER093C	2	G02
156	YCR042C	2	G03
157	YJR127C	2	G04
158	YGR061C	2	G05
159	YOL138C	2	G06
160	YDR217C	2	G07
161	YEL077C	2	G08
162	YMR128W	2	G09
163	YDR097C	2	G10
164	YJL074C	2	G11
165	YDR335W	2	G12
166	YDR326C	2	H01
167	YNL088W	2	H02
168	YML133C	2	H03
169	YGR270W	2	H04
170	YDR301W	2	H05
171	YBR081C	2	H06
172	YLR425W	2	H07
173	YGL133W	2	H09
174	YNL091W	2	H10
175	YMR304W	2	H11
176	YOR151C	2	H12
177	YOR396W	3	A01
178	YML091C	3	A02
179	YOR086C	3	A03
180	YOL078W	3	A04
181	YJR151C	3	A05
182	YGR097W	3	A06
183	YOR188W	3	A07
184	YML104C	3	A08
185	YIL151C	3	A09
186	YER110C	3	A10
187	YPL216W	3	A11
188	YBR150C	3	A12
189	YPL110C	3	B01
190	YLR189C	3	B02
191	YNL106C	3	B03
192	YJL092W	3	B04
193	YGR070W	3	B05
194	YHL023C	3	B06
195	YML117W	3	B07
196	YHR077C	3	B08
197	YJR109C	3	B09
198	YBL063W	3	B10
199	YOL045W	3	B11
200	YER111C	3	B12
201	YLR084C	3	C01
202	YAR009C	3	C02
203	YJR041C	3	C04
204	YLR035C-A	3	C05
205	YLR410W	3	C06
206	YPR022C	3	C07
207	YDL231C	3	C08
208	YBL101C	3	C09
209	YNL163C	3	C10
210	YKL205W	3	C11
211	YOL034W	3	C12
212	YGL140C	3	D01
213	YPL226W	3	D02
214	YBR218C	3	D03
215	YFR031C	3	D04
216	YER013W	3	D06
217	YGL151W	3	D07
218	YGR134W	3	D08
219	YNR067C	3	D09
220	YBR059C	3	D10
221	YPL022W	3	D11
222	YDL215C	3	D12
223	YMR109W	3	E01
224	YKR096W	3	E02
225	YGL062W	3	E03
226	YKL038W	3	E04
227	YJR090C	3	E05
228	YDR507C	3	E06
229	YKL105C	3	E07
230	YER176W	3	E08
231	YNR065C	3	E09
232	YOR109W	3	E10
233	YKR028W	3	E11
234	YJR091C	3	E12
235	YPR026W	3	F01
236	YAL001C	3	F02
237	YGR233C	3	F03
238	YKR102W	3	F04
239	YIL026C	3	F05
240	YER129W	3	F06
241	YAL019W	3	F07
242	YJR039W	3	F08
243	YOL087C	3	F09
244	YGR094W	3	F10
245	YML100W	3	F11
246	YPL160W	3	F12
247	YPR122W	3	G01
248	YJL076W	3	G02
249	YPR049C	3	G03
250	YLR032W	3	G04
251	YOR207C	3	G05
252	YMR317W	3	G06
253	YBR245C	3	G07
254	YPR030W	3	G08
255	YGL094C	3	G09
256	YKL092C	3	G10
257	YMR308C	3	G12
258	YPR010C	3	H01
259	YEL025C	3	H02
260	YLR272C	3	H03
261	YHR158C	3	H04
262	YDR128W	3	H05
263	YGR170W	3	H06
264	YPL115C	3	H07
265	YOR304W	3	H08
266	YLR383W	3	H09
267	YMR218C	3	H10
268	YCL061C	3	H11
269	YMR196W	3	H12
270	YJR035W	4	A01
271	YHR102W	4	A02
272	YJL050W	4	A03
273	YGR274C	4	A04
274	YBL066C	4	A05
275	YCR092C	4	A06
276	YEL061C	4	A07
277	YMR189W	4	A08
278	YDR060W	4	A09
279	YDR028C	4	A10
280	YOR048C	4	A11
281	YDL031W	4	A12
282	YHR119W	4	B02
283	YPR097W	4	B03
284	YNL267W	4	B04
285	YLR039C	4	B05
286	YDL223C	4	B06
287	YKL033W	4	B07
288	YIL128W	4	B08
289	YGR047C	4	B09
290	YIL125W	4	B10
291	YGL241W	4	B11
292	YIL169C	4	B12
293	YGR218W	4	C01
294	YDR291W	4	C02
295	YGL178W	4	C03
296	YML010W	4	C04
297	YNL132W	4	C05
298	YJL084C	4	C06
299	YPL009C	4	C07
300	YPR204W	4	C08
301	YKL210W	4	C09
302	YOR349W	4	C10
303	YAL035W	4	C11
304	YIL112W	4	D01
305	YOL145C	4	D02
306	YKL157W	4	D04
307	YMR261C	4	D05
308	YLR249W	4	D06
309	YCL024W	4	D07
310	YGR258C	4	D08
311	YEL055C	4	D09
312	YPL183C	4	D10
313	YPL040C	4	D11
314	YDR430C	4	D12
315	YPR115W	4	E01
316	YER033C	4	E02
317	YAL051W	4	E04
318	YDR325W	4	E05
319	YNL014W	4	E06
320	YOL089C	4	E08
321	YDR495C	4	E10
322	YOL021C	4	E11
323	YLR071C	4	F01
324	YHR211W	4	F02
325	YKR086W	4	F03
326	YDR310C	4	F04
327	YDR017C	4	F05
328	YKL197C	4	F06
329	YPL075W	4	F07
330	YHR082C	4	F08
331	YDL240W	4	F09
332	YDR379W	4	F10
333	YNL123W	4	F11
334	YGR240C	4	F12
335	YOL051W	4	G01
336	YPR042C	4	G02
337	YNL278W	4	G04
338	YJR132W	4	G05
339	YNL327W	4	G06
340	YGL207W	4	G07
341	YLR187W	4	G08
342	YGL201C	4	G09
343	YKL173W	4	G10
344	YHR073W	4	G11
345	YOL100W	4	H01
346	YGL013C	4	H03
347	YJL098W	4	H04
348	YLL016W	4	H05
349	YER114C	4	H06
350	YIL031W	4	H07
351	YBL037W	4	H08
352	YLL031C	4	H09
353	YOR127W	4	H10
354	YOR363C	4	H11
355	YDL073W	4	H12
356	YMR185W	5	A01
357	YNL236W	5	A02
358	YMR125W	5	A03
359	YMR086W	5	A04
360	YEL043W	5	A05
361	YMR019W	5	A06
362	YJL154C	5	A07
363	YGR089W	5	A08
364	YDR069C	5	A09
365	YKL050C	5	A10
366	YML065W	5	A11
367	YBR289W	5	A12
368	YBL085W	5	B01
369	YOR160W	5	B02
370	YOL155C	5	B03
371	YDR359C	5	B04
372	YGR140W	5	B05
373	YGR204W	5	B06
374	YML076C	5	B07
375	YPR104C	5	B08
376	YBL104C	5	B09
377	YIL017C	5	B10
378	YOR113W	5	B11
379	YFR040W	5	B12
380	YKL015W	5	C01
381	YEL032W	5	C02
382	YBR112C	5	C03
383	YHR120W	5	C04
384	YHL050C	5	C05
385	YIL002C	5	C06
386	YOR005C	5	C07
387	YJR061W	5	C08
388	YDR081C	5	C09
389	YML111W	5	C10
390	YDR213W	5	C11
391	YDR409W	5	C12
392	YLR442C	5	D01
393	YMR080C	5	D02
394	YNL023C	5	D03
395	YMR205C	5	D04
396	YJR089W	5	D05
397	YIL137C	5	D06
398	YLR129W	5	D07
399	YPR019W	5	D08
400	YER032W	5	D09
401	YBR017C	5	D10
402	YLR014C	5	D12
403	YBL005W	5	E01
404	YMR288W	5	E02
405	YBR079C	5	E03
406	YBR073W	5	E04
407	YNL127W	5	E05
408	YLL003W	5	E06
409	YMR124W	5	E07
410	YER075C	5	E08
411	YDR103W	5	E10
412	YGL141W	5	E11
413	YNL082W	5	E12
414	YMR275C	5	F01
415	YIL130W	5	F03
416	YGL227W	5	F04
417	YGR162W	5	F05
418	YIL075C	5	F06
419	YML109W	5	F07
420	YGR056W	5	F08
421	YDL220C	5	F09
422	YGL093W	5	F10
423	YKR089C	5	F11
424	YNL313C	5	F12
425	YBR084W	5	G01
426	YNL118C	5	G02
427	YOL090W	5	G03
428	YOR335C	5	G04
429	YDR421W	5	G05
430	YDR356W	5	G06
431	YHL007C	5	G07
432	YKL171W	5	G08
433	YCR057C	5	G09
434	YGL036W	5	G11
435	YPR160W	5	G12
436	YMR287C	5	H02
437	YDL190C	5	H03
438	YDR395W	5	H06
439	YLR409C	5	H07
440	YPR135W	5	H08
441	YER024W	5	H09
442	YGL049C	5	H10
443	YLL026W	5	H11
444	YDL154W	5	H12
445	YDR006C	6	A01
446	YGL163C	6	A02
447	YDR096W	6	A03
448	YER070W	6	A04
449	YDR303C	6	A05
450	YFL003C	6	A07
451	YDR089W	6	A08
452	YER069W	6	A09
453	YPR105C	6	A10
454	YJL165C	6	A11
455	YMR053C	6	A12
456	YPL150W	6	B01
457	YMR066W	6	B02
458	YLR382C	6	B03
459	YGL014W	6	B04
460	YOR058C	6	B05
461	YJL056C	6	B06
462	YDR186C	6	B07
463	YIL066C	6	B08
464	YKR064W	6	B09
465	YGR071C	6	B10
466	YAL041W	6	B11
467	YBR237W	6	B12
468	YBR225W	6	C01
469	YER047C	6	C02
470	YJL070C	6	C04
471	YDR206W	6	C05
472	YLR386W	6	C06
473	YML034W	6	C07
474	YBL023C	6	C08
475	YLR001C	6	C09
476	YAR044W	6	C10
477	YDL040C	6	C11
478	YKR009C	6	D01
479	YGL180W	6	D02
480	YNR047W	6	D03
481	YLR045C	6	D04
482	YNR011C	6	D07
483	YPL174C	6	D08
484	YMR165C	6	D09
485	YDR416W	6	D10
486	YDR369C	6	D11
487	YPL105C	6	D12
488	YBR055C	6	E01
489	YOR371C	6	E02
490	YOR129C	6	E03
491	YPR112C	6	E04
492	YGR238C	6	E05
493	YNL112W	6	E06
494	YDR285W	6	E07
495	YPL141C	6	E08
496	YNL068C	6	E09
497	YLR115W	6	E10
498	YBR108W	6	E12
499	YLR336C	6	F01
500	YDR074W	6	F02
501	YJR036C	6	F03
502	YJL078C	6	F05
503	YLL013C	6	F06
504	YNL221C	6	F07
505	YGR150C	6	F08
506	YLR347C	6	F09
507	YML061C	6	F10
508	YKL121W	6	F11
509	YAL056W	6	F12
510	YML093W	6	G01
511	YPL126W	6	G02
512	YLR451W	6	G04
513	YKL073W	6	G05
514	YNL325C	6	G06
515	YOR038C	6	G07
516	YNL256W	6	G08
517	YOR217W	6	G09
518	YNL126W	6	G12
519	YDR466W	6	H01
520	YLR357W	6	H03
521	YDL117W	6	H04
522	YOR141C	6	H05
523	YBR281C	6	H06
524	YCR030C	6	H07
525	YDR422C	6	H08
526	YPL008W	6	H09
527	YHR047C	6	H10
528	YOR373W	6	H11
529	YBR202W	6	H12
530	YDR505C	7	A02
531	YAL021C	7	A03
532	YGL073W	7	A04
533	YNL085W	7	A05
534	YLL032C	7	A06
535	YJL187C	7	A07
536	YGR130C	7	A08
537	YKR099W	7	A09
538	YPL207W	7	A10
539	YMR049C	7	A11
540	YIL143C	7	B01
541	YBL008W	7	B02
542	YLL034C	7	B03
543	YCR106W	7	B04
544	YJL089W	7	B05
545	YPL032C	7	B06
546	YGL229C	7	B07
547	YLR176C	7	B09
548	YDL122W	7	B10
549	YER144C	7	B11
550	YMR031C	7	C01
551	YHR131C	7	C02
552	YOR018W	7	C03
553	YFL024C	7	C04
554	YBR133C	7	C05
555	YHR205W	7	C06
556	YBR049C	7	C09
557	YGL216W	7	C11
558	YCL030C	7	C12
559	YDR385W	7	D01
560	YDR207C	7	D03
561	YHR056C	7	D04
562	YIL107C	7	D05
563	YHR172W	7	D06
564	YOR322C	7	D07
565	YLR228C	7	D08
566	YDL148C	7	D09
567	YGL083W	7	D11
568	YER109C	7	D12
569	YJL047C	7	E01
570	YKL022C	7	E02
571	YIL038C	7	E03
572	YPR029C	7	E04
573	YJL087C	7	E05
574	YJL051W	7	E06
575	YGR196C	7	E07
576	YLR095C	7	E08
577	YDR485C	7	E09
578	YBR058C	7	E11
579	YPL180W	7	E12
580	YNL298W	7	F01
581	YNL041C	7	F02
582	YDL126C	7	F03
583	YBL052C	7	F04
584	YLR263W	7	F05
585	YOR195W	7	F06
586	YGR198W	7	F07
587	YMR309C	7	F08
588	YIL095W	7	F09
589	YBR276C	7	F10
590	YLR182W	7	F11
591	YBR198C	7	F12
592	YOR133W	7	G01
593	YKR079C	7	G02
594	YMR102C	7	G03
595	YDR251W	7	G04
596	YPL153C	7	G06
597	YLR222C	7	G07
598	YDR258C	7	G08
599	YML035C	7	G09
600	YJL141C	7	G10
601	YGL139W	7	G11
602	YPL045W	7	G12
603	YCL054W	7	H01
604	YML029W	7	H02
605	YDL056W	7	H03
606	YJL157C	7	H04
607	YJL176C	7	H05
608	YJL102W	7	H06
609	YLR337C	7	H07
610	YJR126C	7	H08
611	YOR162C	7	H09
612	YLR352W	7	H10
613	YGL234W	7	H11
614	YBR284W	7	H12
615	YCR077C	8	A01
616	YBL113C	8	A02
617	YNL183C	8	A03
618	YNR033W	8	A04
619	YBR001C	8	A05
620	YFR038W	8	A06
621	YJL020C	8	A07
622	YOL006C	8	A08
623	YOR140W	8	A09
624	YOR361C	8	A10
625	YBL084C	8	A11
626	YDL164C	8	A12
627	YER169W	8	B01
628	YNL186W	8	B02
629	YJL200C	8	B03
630	YOR172W	8	B04
631	YLR304C	8	B06
632	YKR010C	8	B07
633	YER091C	8	B08
634	YJL206C	8	B11
635	YFL023W	8	C01
636	YOR144C	8	C02
637	YDR208W	8	C05
638	YJL033W	8	C07
639	YGL120C	8	C08
640	YOL036W	8	C10
641	YKL034W	8	C11
642	YER098W	8	C12
643	YHR204W	8	D01
644	YOR353C	8	D02
645	YDL060W	8	D03
646	YGR237C	8	D04
647	YFL009W	8	D05
648	YOR165W	8	D06
649	YKL134C	8	D07
650	YGR245C	8	D08
651	YIR007W	8	D09
652	YOR112W	8	D10
653	YMR164C	8	D11
654	YER162C	8	D12
655	YOL076W	8	E01
656	YBR114W	8	E02
657	YGR200C	8	E03
658	YHR182W	8	E04
659	YGL009C	8	E05
660	YLR274W	8	E06
661	YLR131C	8	E07
662	YNL224C	8	E08
663	YJL090C	8	E09
664	YAL031C	8	E10
665	YMR179W	8	E11
666	YNL258C	8	E12
667	YER184C	8	F01
668	YBR172C	8	F02
669	YLR319C	8	F03
670	YMR016C	8	F04
671	YLR144C	8	F05
672	YML006C	8	F06
673	YPR091C	8	F07
674	YNL247W	8	F08
675	YLR114C	8	F09
676	YPL158C	8	F11
677	YPL074W	8	F12
678	YGR067C	8	G01
679	YDL239C	8	G02
680	YPL176C	8	G04
681	YLR277C	8	G05
682	YBR142W	8	G06
683	YLL054C	8	G07
684	YDR490C	8	G08
685	YHR197W	8	G09
686	YOR014W	8	G11
687	YBR094W	8	G12
688	YOR178C	8	H01
689	YDR034C	8	H02
690	YFR013W	8	H03
691	YGR250C	8	H04
692	YER171W	8	H05
693	YDR520C	8	H06
694	YMR167W	8	H07
695	YKL072W	8	H08
696	YNL311C	8	H09
697	YOR337W	8	H10
698	YNL161W	8	H11
699	YBR102C	8	H12
700	YDR138W	9	A01
701	YOR208W	9	A02
702	YDR499W	9	A03
703	YGR003W	9	A04
704	YLL019C	9	A05
705	YKL168C	9	A06
706	YJL082W	9	A07
707	YLR219W	9	A08
708	YMR237W	9	A09
709	YDL167C	9	A10
710	YPL164C	9	A11
711	YFR009W	9	B01
712	YGL086W	9	B02
713	YOR076C	9	B03
714	YHR178W	9	B04
715	YPL029W	9	B05
716	YEL053C	9	B06
717	YKL112W	9	B07
718	YMR154C	9	B08
719	YDR333C	9	B09
720	YMR172W	9	B10
721	YFL047W	9	B11
722	YDR211W	9	B12
723	YLL008W	9	C01
724	YLL029W	9	C02
725	YDL234C	9	C03
726	YKR024C	9	C04
727	YBR007C	9	C05
728	YFR022W	9	C06
729	YER040W	9	C07
730	YKL135C	9	C08
731	YHR031C	9	C09
732	YKL104C	9	C10
733	YLR006C	9	C12
734	YDR001C	9	D01
735	YOR034C	9	D02
736	YJL099W	9	D03
737	YMR216C	9	D04
738	YPR090W	9	D05
739	YJL168C	9	D06
740	YLR149C	9	D07
741	YOR156C	9	D08
742	YGR178C	9	D09
743	YKR098C	9	D10
744	YOL017W	9	D11
745	YOL057W	9	D12
746	YGR264C	9	E01
747	YOR081C	9	E02
748	YOR080W	9	E03
749	YMR078C	9	E04
750	YGR186W	9	E05
751	YLR381W	9	E06
752	YOR019W	9	E07
753	YKR018C	9	E08
754	YIL091C	9	E09
755	YLR362W	9	E10
756	YAL054C	9	E11
757	YDR436W	9	E12
758	YKR029C	9	F01
759	YGL205W	9	F02
760	YOR299W	9	F03
761	YNL144C	9	F04
762	YKL078W	9	F05
763	YOR001W	9	F06
764	YPR141C	9	F07
765	YNR044W	9	F08
766	YCR091W	9	F09
767	YDR109C	9	F10
768	YCR084C	9	F11
769	YOR206W	9	F12
770	YJL132W	9	G01
771	YLR135W	9	G02
772	YCL039W	9	G03
773	YKL054C	9	G04
774	YHR149C	9	G05
775	YMR277W	9	G06
776	YBL097W	9	G07
777	YLR335W	9	G09
778	YKL213C	9	G10
779	YGR128C	9	G11
780	YDR146C	9	G12
781	YKL187C	9	H01
782	YPR031W	9	H02
783	YJR030C	9	H03
784	YPR185W	9	H04
785	YIL078W	9	H05
786	YJR119C	9	H07
787	YGL245W	9	H08
788	YMR192W	9	H09
789	YOR022C	9	H10
790	YHL024W	9	H11
791	YLR440C	10	A01
792	YKR090W	10	A02
793	YMR163C	10	A03
794	YAR014C	10	A04
795	YOR317W	10	A05
796	YIL108W	10	A06
797	YDR234W	10	A07
798	YPR175W	10	A08
799	YGR099W	10	A09
800	YLR117C	10	A10
801	YLR143W	10	A11
802	YEL023C	10	A12
803	YPL240C	10	B01
804	YMR006C	10	B02
805	YMR186W	10	B03
806	YDR176W	10	B04
807	YBR019C	10	B05
808	YLR035C	10	B06
809	YLR072W	10	B07
810	YIL144W	10	B08
811	YLR260W	10	B10
812	YOR249C	10	B11
813	YJL034W	10	B12
814	YDL176W	10	C01
815	YNL021W	10	C02
816	YBR131W	10	C03
817	YDR221W	10	C04
818	YDL214C	10	C05
819	YOL141W	10	C06
820	YPL106C	10	C07
821	YDL141W	10	C08
822	YHR084W	10	C09
823	YMR108W	10	C10
824	YPL043W	10	C11
825	YBR117C	10	C12
826	YFR015C	10	D01
827	YPL155C	10	D02
828	YDR052C	10	D03
829	YOR033C	10	D04
830	YLR233C	10	D05
831	YBR255W	10	D06
832	YGL071W	10	D08
833	YJR110W	10	D09
834	YIL105C	10	D10
835	YBL024W	10	D11
836	YKL126W	10	D12
837	YLR424W	10	E01
838	YBL035C	10	E02
839	YEL011W	10	E03
840	YGR266W	10	E04
841	YBR156C	10	E05
842	YIL009W	10	E06
843	YFL013C	10	E07
844	YDR332W	10	E08
845	YPL222W	10	E09
846	YLR047C	10	E10
847	YMR075W	10	E11
848	YPR007C	10	E12
849	YGL026C	10	F01
850	YKL222C	10	F02
851	YLR266C	10	F04
852	YDR108W	10	F05
853	YMR246W	10	F06
854	YML016C	10	F07
855	YBL067C	10	F08
856	YBL060W	10	F09
857	YLR399C	10	F10
858	YKL017C	10	F11
859	YPR074C	10	F12
860	YGR145W	10	G01
861	YLR258W	10	G02
862	YMR037C	10	G03
863	YBL111C	10	G04
864	YLR452C	10	G05
865	YPR008W	10	G06
866	YMR224C	10	G07
867	YBR259W	10	G08
868	YDR444W	10	G09
869	YDR172W	10	G10
870	YLR153C	10	G11
871	YDR129C	10	G12
872	YJR134C	10	H01
873	YMR001C	10	H02
874	YOR365C	10	H03
875	YDL074C	10	H04
876	YBR169C	10	H06
877	YOR354C	10	H07
878	YER077C	10	H08
879	YER022W	10	H09
880	YGL144C	10	H10
881	YLR403W	10	H11
882	YGL236C	10	H12
883	YHL029C	11	A01
884	YMR104C	11	A02
885	YDR452W	11	A03
886	YER088C	11	A04
887	YGL113W	11	A05
888	YLL007C	11	A06
889	YNR053C	11	A07
890	YOR275C	11	A08
891	YPL104W	11	A09
892	YNL047C	11	A10
893	YOR147W	11	A11
894	YBR123C	11	A12
895	YIR003W	11	B01
896	YMR232W	11	B02
897	YOR054C	11	B03
898	YLR427W	11	B04
899	YJL128C	11	B05
900	YDR194C	11	B06
901	YOR350C	11	B07
902	YLR299W	11	B08
903	YJR098C	11	B10
904	YDL224C	11	B12
905	YKL025C	11	C01
906	YBL009W	11	C02
907	YBR212W	11	C03
908	YML042W	11	C04
909	YML088W	11	C05
910	YML020W	11	C06
911	YAL048C	11	C07
912	YML056C	11	C08
913	YLR369W	11	C09
914	YOL113W	11	C10
915	YGR083C	11	C11
916	YIL155C	11	C12
917	YKL179C	11	D01
918	YOL023W	11	D02
919	YDR362C	11	D03
920	YKL029C	11	D04
921	YBR121C	11	D05
922	YDR307W	11	D07
923	YOL025W	11	D08
924	YPL023C	11	D09
925	YPR179C	11	D10
926	YLR429W	11	D11
927	YML082W	11	D12
928	YJL101C	11	E01
929	YOR243C	11	E02
930	YNL103W	11	E03
931	YMR032W	11	E04
932	YJL057C	11	E05
933	YDR137W	11	E06
934	YFR048W	11	E07
935	YPR161C	11	E09
936	YDR389W	11	E10
937	YPL263C	11	E11
938	YLR098C	11	E12
939	YKR101W	11	F01
940	YPL089C	11	F02
941	YLR330W	11	F03
942	YNL008C	11	F04
943	YBR260C	11	F05
944	YDR458C	11	F06
945	YMR137C	11	F07
946	YHR015W	11	F08
947	YDR496C	11	F09
948	YJL209W	11	F10
949	YLR103C	11	F11
950	YLR273C	11	F12
951	YNL027W	11	G01
952	YBR216C	11	G02
953	YNL045W	11	G03
954	YBL051C	11	G04
955	YEL007W	11	G05
956	YJL149W	11	G06
957	YNL197C	11	G07
958	YKR036C	11	G08
959	YKL079W	11	G09
960	YML007W	11	G11
961	YDL109C	11	G12
962	YDR295C	11	H02
963	YOR138C	11	H03
964	YDR320C	11	H04
965	YJL010C	11	H05
966	YLR002C	11	H06
967	YNR008W	11	H07
968	YNL012W	11	H08
969	YLR234W	11	H09
970	YPR190C	11	H10
971	YBL075C	11	H11
972	YDR014W	11	H12
973	YIL101C	12	A01
974	YLR289W	12	A02
975	YAL005C	12	A03
976	YDL113C	12	A04
977	YLL024C	12	A05
978	YNL176C	12	A06
979	YNL293W	12	A07
980	YCR061W	12	A08
981	YNR038W	12	A09
982	YHR124W	12	A10
983	YNL299W	12	A11
984	YBR215W	12	A12
985	YNL167C	12	B01
986	YOL117W	12	B02
987	YBR280C	12	B03
988	YGL099W	12	B04
989	YAL011W	12	B05
990	YAL016W	12	B06
991	YOR181W	12	B07
992	YOR356W	12	B08
993	YOL152W	12	B09
994	YIL055C	12	B10
995	YEL062W	12	B11
996	YDL203C	12	B12
997	YPL093W	12	C01
998	YEL030W	12	C02
999	YCR038C	12	C03
1000	YIL046W	12	C04
1001	YDL070W	12	C05
1002	YDR380W	12	C06
1003	YPL161C	12	C07
1004	YHL038C	12	C08
1005	YOR066W	12	C09
1006	YKL125W	12	C10
1007	YER147C	12	C11
1008	YFL049W	12	C12
1009	YPL253C	12	D01
1010	YER049W	12	D02
1011	YDR311W	12	D03
1012	YIL056W	12	D04
1013	YNL020C	12	D05
1014	YDR049W	12	D07
1015	YHR035W	12	D08
1016	YOR239W	12	D09
1017	YDR228C	12	D10
1018	YGL110C	12	D11
1019	YAL047C	12	D12
1020	YGL107C	12	E01
1021	YGL124C	12	E02
1022	YER103W	12	E03
1023	YJL127C	12	E04
1024	YHR161C	12	E05
1025	YGL023C	12	E06
1026	YDR386W	12	E07
1027	YIL014W	12	E08
1028	YHR166C	12	E10
1029	YHR219W	12	E11
1030	YGR221C	12	E12
1031	YOL164W	12	F01
1032	YPL269W	12	F02
1033	YGR054W	12	F03
1034	YKL048C	12	F04
1035	YOR070C	12	F05
1036	YDR477W	12	F06
1037	YDR419W	12	F07
1038	YKL062W	12	F08
1039	YKL155C	12	F09
1040	YDR425W	12	F10
1041	YMR119W	12	F11
1042	YHR206W	12	F12
1043	YPL210C	12	G01
1044	YDR398W	12	G02
1045	YMR313C	12	G03
1046	YDR266C	12	G04
1047	YDR390C	12	G05
1048	YHR114W	12	G06
1049	YKL204W	12	G07
1050	YML046W	12	G08
1051	YLR177W	12	G09
1052	YHL027W	12	G10
1053	YOR171C	12	G11
1054	YMR278W	12	G12
1055	YJL106W	12	H01
1056	YHR091C	12	H02
1057	YGL060W	12	H03
1058	YJR130C	12	H04
1059	YHR218W	12	H05
1060	YIL092W	12	H06
1061	YMR106C	12	H08
1062	YER080W	12	H09
1063	YOR389W	12	H11
1064	YNR006W	12	H12
1065	YOR137C	13	A01
1066	YLR206W	13	A04
1067	YDR350C	13	A05
1068	YHR188C	13	A06
1069	YMR168C	13	A07
1070	YGR103W	13	A08
1071	YOR204W	13	A09
1072	YGL192W	13	A10
1073	YKL032C	13	A11
1074	YMR198W	13	A12
1075	YAR007C	13	B01
1076	YMR100W	13	B02
1077	YPL119C	13	B03
1078	YNL209W	13	B04
1079	YFR023W	13	B05
1080	YLR248W	13	B06
1081	YDR341C	13	B07
1082	YIL072W	13	B08
1083	YCR008W	13	B09
1084	YGR194C	13	B10
1085	YDR144C	13	B11
1086	YNL039W	13	B12
1087	YPL020C	13	C01
1088	YDL013W	13	C02
1089	YGL142C	13	C03
1090	YMR098C	13	C04
1091	YJL181W	13	C05
1092	YBR148W	13	C06
1093	YJL100W	13	C07
1094	YDR200C	13	C08
1095	YLR353W	13	C09
1096	YGL125W	13	C10
1097	YDR349C	13	C11
1098	YDR101C	13	C12
1099	YBR060C	13	D01
1100	YNL104C	13	D02
1101	YNL018C	13	D04
1102	YKR084C	13	D05
1103	YDL080C	13	D06
1104	YML071C	13	D07
1105	YJL083W	13	D08
1106	YHR202W	13	D09
1107	YJL201W	13	D10
1108	YGR246C	13	D11
1109	YGR225W	13	D12
1110	YDL025C	13	E01
1111	YOR030W	13	E02
1112	YPR155C	13	E03
1113	YNL034W	13	E04
1114	YDL153C	13	E05
1115	YLR401C	13	E06
1116	YNR063W	13	E07
1117	YJR046W	13	E08
1118	YLR055C	13	E09
1119	YLR060W	13	E11
1120	YJR002W	13	E12
1121	YDL063C	13	F01
1122	YJL103C	13	F02
1123	YKR019C	13	F03
1124	YPL070W	13	F04
1125	YDR143C	13	F05
1126	YOL091W	13	F06
1127	YML057W	13	F08
1128	YMR284W	13	F09
1129	YPL243W	13	F10
1130	YJL069C	13	F11
1131	YKR069W	13	F12
1132	YDR085C	13	G01
1133	YNL061W	13	G02
1134	YMR092C	13	G03
1135	YPL184C	13	G04
1136	YER036C	13	G05
1137	YDR506C	13	G06
1138	YPL005W	13	G07
1139	YOL148C	13	G08
1140	YOR324C	13	G09
1141	YDL079C	13	G10
1142	YKL005C	13	G11
1143	YCR088W	13	G12
1144	YGR013W	13	H01
1145	YPR081C	13	H02
1146	YDL229W	13	H03
1147	YPL194W	13	H04
1148	YGL116W	13	H05
1149	YLR173W	13	H06
1150	YPR018W	13	H07
1151	YOR108W	13	H08
1152	YBR186W	13	H09
1153	YLR368W	13	H10
1154	YLR276C	13	H11
1155	YLR089C	13	H12
1156	YMR120C	14	A01
1157	YMR227C	14	A02
1158	YOR027W	14	A03
1159	YIL036W	14	A04
1160	YMR291W	14	A05
1161	YKR078W	14	A06
1162	YCL051W	14	A07
1163	YJL216C	14	A08
1164	YBL039C	14	A09
1165	YOR260W	14	A10
1166	YJL172W	14	A11
1167	YNL251C	14	A12
1168	YNL227C	14	B02
1169	YDR243C	14	B03
1170	YNL094W	14	B04
1171	YOL015W	14	B05
1172	YMR250W	14	B06
1173	YDL038C	14	B07
1174	YML127W	14	B08
1175	YHR150W	14	B09
1176	YDR463W	14	B10
1177	YLR196W	14	B11
1178	YPR006C	14	B12
1179	YFL053W	14	C01
1180	YOR073W	14	C02
1181	YGL252C	14	C03
1182	YNL218W	14	C04
1183	YBR163W	14	C05
1184	YBR299W	14	C06
1185	YKL012W	14	C07
1186	YNL225C	14	C08
1187	YHR194W	14	C09
1188	YER165W	14	C10
1189	YNL073W	14	C11
1190	YLR028C	14	D01
1191	YDR294C	14	D02
1192	YKL185W	14	D03
1193	YOR154W	14	D04
1194	YHL010C	14	D05
1195	YGR292W	14	D06
1196	YLR077W	14	D07
1197	YOL153C	14	D08
1198	YKL124W	14	D09
1199	YGL228W	14	D10
1200	YPR171W	14	D11
1201	YJR053W	14	D12
1202	YML054C	14	E01
1203	YGR287C	14	E02
1204	YPL007C	14	E03
1205	YOR308C	14	E04
1206	YHL039W	14	E05
1207	YML013W	14	E06
1208	YPL208W	14	E07
1209	YAL040C	14	E08
1210	YPR083W	14	E09
1211	YGR278W	14	E10
1212	YGR171C	14	E11
1213	YBR045C	14	E12
1214	YNL308C	14	F01
1215	YIL172C	14	F02
1216	YDL174C	14	F03
1217	YDL227C	14	F04
1218	YHR108W	14	F05
1219	YML070W	14	F06
1220	YCR014C	14	F07
1221	YBR170C	14	F08
1222	YBR078W	14	F09
1223	YER086W	14	F10
1224	YHR037W	14	F11
1225	YER124C	14	F12
1226	YOL066C	14	G01
1227	YJL221C	14	G02
1228	YER068W	14	G03
1229	YGR068C	14	G04
1230	YHR109W	14	G05
1231	YNL076W	14	G06
1232	YDR440W	14	G07
1233	YMR282C	14	G08
1234	YLR361C	14	G09
1235	YER087W	14	G10
1236	YHR196W	14	G11
1237	YER158C	14	G12
1238	YMR213W	14	H01
1239	YOL157C	14	H02
1240	YIL015W	14	H03
1241	YJL186W	14	H04
1242	YJR016C	14	H05
1243	YOL115W	14	H06
1244	YLR133W	14	H07
1245	YNR059W	14	H08
1246	YML017W	14	H09
1247	YIR010W	14	H10
1248	YLL058W	14	H11
1249	YGR088W	14	H12
1250	YLL012W	15	A01
1251	YPR121W	15	A02
1252	YGL160W	15	A03
1253	YLR417W	15	A05
1254	YCR065W	15	A06
1255	YLR134W	15	A07
1256	YEL020C	15	A08
1257	YDR212W	15	A09
1258	YLL018C	15	A10
1259	YJL153C	15	A11
1260	YOL027C	15	B01
1261	YPR145W	15	B02
1262	YKL127W	15	B03
1263	YKR015C	15	B04
1264	YNR023W	15	B05
1265	YGL171W	15	B06
1266	YDL042C	15	B07
1267	YGL179C	15	B08
1268	YGL244W	15	B09
1269	YPL086C	15	B10
1270	YLR343W	15	B11
1271	YIR031C	15	B12
1272	YPR137W	15	C01
1273	YHR184W	15	C02
1274	YLR267W	15	C03
1275	YOR118W	15	C04
1276	YOR023C	15	C05
1277	YJR103W	15	C06
1278	YDR261C	15	C07
1279	YGR166W	15	C08
1280	YGL257C	15	C09
1281	YDR131C	15	C10
1282	YNL182C	15	C11
1283	YKL109W	15	C12
1284	YGR092W	15	D01
1285	YIL150C	15	D02
1286	YLR120C	15	D03
1287	YPL030W	15	D04
1288	YPR070W	15	D05
1289	YPR111W	15	D06
1290	YJR064W	15	D07
1291	YJL105W	15	D08
1292	YNL193W	15	D09
1293	YER140W	15	D10
1294	YMR036C	15	D12
1295	YGR124W	15	E01
1296	YKL088W	15	E02
1297	YLR253W	15	E03
1298	YCL036W	15	E04
1299	YBR263W	15	E05
1300	YBR286W	15	E06
1301	YKR072C	15	E07
1302	YMR136W	15	E08
1303	YDR358W	15	E09
1304	YML023C	15	E10
1305	YBR196C	15	E11
1306	YNL117W	15	E12
1307	YHR064C	15	F01
1308	YOR128C	15	F02
1309	YMR105C	15	F03
1310	YDR117C	15	F05
1311	YCR054C	15	F06
1312	YLR286C	15	F07
1313	YMR145C	15	F08
1314	YEL058W	15	F09
1315	YOR205C	15	F10
1316	YDR479C	15	F11
1317	YOR372C	15	F12
1318	YLR259C	15	G01
1319	YDR026C	15	G02
1320	YGR241C	15	G03
1321	YDR110W	15	G04
1322	YJR052W	15	G05
1323	YGR087C	15	G06
1324	YPL128C	15	G07
1325	YPR072W	15	G08
1326	YER065C	15	G09
1327	YDR474C	15	G10
1328	YER082C	15	G11
1329	YGL076C	15	G12
1330	YOR090C	15	H01
1331	YDR120C	15	H02
1332	YGL003C	15	H04
1333	YOR386W	15	H05
1334	YLR044C	15	H06
1335	YGL064C	15	H07
1336	YDL106C	15	H08
1337	YFL042C	15	H10
1338	YGL176C	15	H11
1339	YGR276C	15	H12
1340	YLR433C	16	A01
1341	YEL015W	16	A02
1342	YJL111W	16	A03
1343	YPL228W	16	A04
1344	YMR199W	16	A05
1345	YDR235W	16	A06
1346	YGL028C	16	A07
1347	YDR061W	16	A08
1348	YOL033W	16	A09
1349	YJL014W	16	A10
1350	YMR110C	16	A11
1351	YBR239C	16	A12
1352	YMR258C	16	B01
1353	YFR028C	16	B02
1354	YMR171C	16	B03
1355	YDR232W	16	B04
1356	YOR380W	16	B05
1357	YOR002W	16	B06
1358	YNL189W	16	B07
1359	YDR145W	16	B08
1360	YBR103W	16	B09
1361	YKL191W	16	B10
1362	YMR297W	16	B11
1363	YIL146C	16	B12
1364	YBR030W	16	C01
1365	YGR023W	16	C02
1366	YBR158W	16	C03
1367	YER054C	16	C04
1368	YPR033C	16	C05
1369	YPL212C	16	C06
1370	YNL249C	16	C07
1371	YFR006W	16	C09
1372	YNL199C	16	C10
1373	YDL020C	16	C11
1374	YPR162C	16	C12
1375	YBR248C	16	D01
1376	YJL110C	16	D02
1377	YDR242W	16	D03
1378	YKL140W	16	D04
1379	YBR270C	16	D05
1380	YBL080C	16	D07
1381	YIL045W	16	D08
1382	YOL123W	16	D10
1383	YDL030W	16	D11
1384	YAL028W	16	D12
1385	YML069W	16	E01
1386	YKR017C	16	E02
1387	YOR241W	16	E04
1388	YDL085W	16	E05
1389	YJL058C	16	E06
1390	YHR006W	16	E07
1391	YLR020C	16	E08
1392	YML115C	16	E09
1393	YDR195W	16	E10
1394	YDL178W	16	E11
1395	YBR020W	16	E12
1396	YPR144C	16	F01
1397	YOL055C	16	F02
1398	YKL089W	16	F03
1399	YGR041W	16	F04
1400	YPL256C	16	F05
1401	YLR023C	16	F06
1402	YPR088C	16	F07
1403	YMR015C	16	F08
1404	YDR147W	16	F09
1405	YDR488C	16	F10
1406	YJR049C	16	F11
1407	YDL143W	16	F12
1408	YBR200W	16	G01
1409	YPL258C	16	G02
1410	YKR097W	16	G03
1411	YDR188W	16	G04
1412	YML124C	16	G05
1413	YPL109C	16	G06
1414	YKR016W	16	G07
1415	YIR039C	16	G08
1416	YDR299W	16	G09
1417	YNL294C	16	G10
1418	YKR023W	16	G11
1419	YDL170W	16	G12
1420	YDL225W	16	H01
1421	YPL260W	16	H02
1422	YPL179W	16	H03
1423	YER168C	16	H04
1424	YBR223C	16	H05
1425	YDR057W	16	H06
1426	YPL214C	16	H07
1427	YDR403W	16	H08
1428	YDR434W	16	H09
1429	YIL162W	16	H10
1430	YLR313C	16	H11
1431	YDR534C	16	H12
1432	YKL045W	17	A01
1433	YIL142W	17	A02
1434	YNL138W	17	A03
1435	YOR359W	17	A06
1436	YBL019W	17	A07
1437	YER007W	17	A08
1438	YIL097W	17	A09
1439	YJL013C	17	A10
1440	YDL101C	17	A11
1441	YMR093W	17	A12
1442	YKL139W	17	B01
1443	YKL074C	17	B02
1444	YOR360C	17	B03
1445	YOR377W	17	B04
1446	YGL078C	17	B05
1447	YPL247C	17	B06
1448	YBR227C	17	B07
1449	YHR170W	17	B08
1450	YKL047W	17	B09
1451	YMR285C	17	B10
1452	YDR169C	17	B11
1453	YMR283C	17	B12
1454	YNL077W	17	C01
1455	YBL015W	17	C02
1456	YBL054W	17	C03
1457	YBR138C	17	C04
1458	YHR009C	17	C05
1459	YDR009W	17	C07
1460	YKL116C	17	C08
1461	YOR149C	17	C09
1462	YNR051C	17	C10
1463	YGR123C	17	C11
1464	YPL122C	17	C12
1465	YBR214W	17	D01
1466	YGL190C	17	D02
1467	YBR028C	17	D03
1468	YHR016C	17	D04
1469	YHR086W	17	D05
1470	YDL156W	17	D06
1471	YER006W	17	D07
1472	YLR392C	17	D08
1473	YPL198W	17	D09
1474	YCR053W	17	D10
1475	YHR137W	17	D11
1476	YER096W	17	D12
1477	YBR274W	17	E01
1478	YHR151C	17	E02
1479	YDL197C	17	E03
1480	YMR215W	17	E04
1481	YHR216W	17	E05
1482	YNL116W	17	E06
1483	YER073W	17	E07
1484	YMR064W	17	E08
1485	YPR002W	17	E09
1486	YJL025W	17	E10
1487	YIL001W	17	E11
1488	YGL158W	17	E12
1489	YER025W	17	F01
1490	YHR207C	17	F02
1491	YGL122C	17	F03
1492	YNL295W	17	F04
1493	YLR324W	17	F05
1494	YOR355W	17	F06
1495	YLR314C	17	F07
1496	YDR518W	17	F08
1497	YKL103C	17	F10
1498	YJL194W	17	F11
1499	YGR059W	17	F12
1500	YER052C	17	G01
1501	YML086C	17	G02
1502	YGR227W	17	G03
1503	YBR184W	17	G04
1504	YLR432W	17	G05
1505	YDR501W	17	G06
1506	YMR014W	17	G07
1507	YPL272C	17	G08
1508	YDL159W	17	G09
1509	YMR018W	17	G10
1510	YML120C	17	G11
1511	YLR054C	17	G12
1512	YGL056C	17	H01
1513	YMR023C	17	H02
1514	YML096W	17	H03
1515	YBR250W	17	H04
1516	YMR029C	17	H05
1517	YKL081W	17	H06
1518	YOR374W	17	H07
1519	YGL112C	17	H08
1520	YDR256C	17	H09
1521	YPR169W	17	H10
1522	YML128C	17	H11
1523	YDR371W	17	H12
1524	YMR300C	18	A02
1525	YDR111C	18	A03
1526	YDR030C	18	A04
1527	YGR229C	18	A05
1528	YML032C	18	A06
1529	YEL070W	18	A07
1530	YDR516C	18	A09
1531	YHR168W	18	A10
1532	YOR351C	18	A11
1533	YJR010W	18	B01
1534	YEL052W	18	B02
1535	YER090W	18	B03
1536	YDR168W	18	B04
1537	YLR015W	18	B05
1538	YDR539W	18	B06
1539	YMR115W	18	B08
1540	YKL035W	18	B10
1541	YEL071W	18	B11
1542	YDR257C	18	B12
1543	YMR131C	18	C01
1544	YLR345W	18	C02
1545	YGR093W	18	C03
1546	YMR169C	18	C04
1547	YML118W	18	C05
1548	YFL022C	18	C06
1549	YLR033W	18	C07
1550	YNR012W	18	C08
1551	YGL202W	18	C09
1552	YPL017C	18	C10
1553	YOL061W	18	C11
1554	YGR091W	18	C12
1555	YOR310C	18	D01
1556	YBR139W	18	D02
1557	YGR155W	18	D03
1558	YMR170C	18	D04
1559	YMR290C	18	D05
1560	YGL017W	18	D06
1561	YLR094C	18	D07
1562	YPL061W	18	D09
1563	YPL072W	18	D10
1564	YPL100W	18	D11
1565	YOR269W	18	D12
1566	YFL021W	18	E01
1567	YLR121C	18	E02
1568	YGR189C	18	E03
1569	YNL223W	18	E04
1570	YNL241C	18	E05
1571	YGL065C	18	E06
1572	YNR073C	18	E07
1573	YAL038W	18	E08
1574	YDR348C	18	E09
1575	YBR006W	18	E10
1576	YMR033W	18	E11
1577	YPL204W	18	E12
1578	YFR039C	18	F01
1579	YMR020W	18	F02
1580	YIL104C	18	F03
1581	YOR347C	18	F04
1582	YGL035C	18	F05
1583	YPL026C	18	F07
1584	YCL040W	18	F08
1585	YFL018C	18	F09
1586	YCL017C	18	F10
1587	YBR126C	18	F11
1588	YEL016C	18	F12
1589	YJR015W	18	G01
1590	YOR231W	18	G02
1591	YML043C	18	G03
1592	YPL140C	18	G04
1593	YHR159W	18	G05
1594	YOL068C	18	G06
1595	YBR056W	18	G07
1596	YDR036C	18	G08
1597	YFR010W	18	G09
1598	YFL027C	18	G10
1599	YDR132C	18	G11
1600	YER122C	18	G12
1601	YML114C	18	H01
1602	YDL017W	18	H02
1603	YDL160C	18	H03
1604	YPL181W	18	H04
1605	YLR197W	18	H05
1606	YDR522C	18	H06
1607	YGL119W	18	H07
1608	YDR330W	18	H08
1609	YHR070W	18	H09
1610	YJR122W	18	H10
1611	YEL041W	18	H11
1612	YHL012W	18	H12
1613	YLR227C	19	A01
1614	YPL097W	19	A02
1615	YOL049W	19	A03
1616	YDL238C	19	A04
1617	YNL053W	19	A05
1618	YPL277C	19	A06
1619	YOR043W	19	A07
1620	YKL211C	19	A08
1621	YCR052W	19	A09
1622	YHR024C	19	A10
1623	YDR381W	19	A11
1624	YGR255C	19	A12
1625	YNL119W	19	B01
1626	YPL219W	19	B02
1627	YPR119W	19	B03
1628	YDR402C	19	B04
1629	YNR069C	19	B05
1630	YBL103C	19	B06
1631	YPR001W	19	B07
1632	YNL026W	19	B08
1633	YDR514C	19	B09
1634	YJL162C	19	B10
1635	YDR181C	19	B11
1636	YNL261W	19	B12
1637	YCR024C	19	C01
1638	YCR045C	19	C02
1639	YFR024C-A	19	C03
1640	YER045C	19	C04
1641	YPL254W	19	C05
1642	YBR083W	19	C06
1643	YML085C	19	C07
1644	YOL030W	19	C08
1645	YLR175W	19	C09
1646	YKL028W	19	C10
1647	YDR346C	19	C11
1648	YNR001C	19	C12
1649	YDR240C	19	D01
1650	YDL146W	19	D02
1651	YDL048C	19	D03
1652	YHR183W	19	D04
1653	YER141W	19	D06
1654	YFR053C	19	D07
1655	YOL144W	19	D08
1656	YNL239W	19	D09
1657	YFR044C	19	D11
1658	YOR298W	19	D12
1659	YER051W	19	E01
1660	YDR182W	19	E02
1661	YDR523C	19	E03
1662	YJL081C	19	E04
1663	YCR066W	19	E05
1664	YGL253W	19	E06
1665	YLR108C	19	E07
1666	YOR119C	19	E08
1667	YPL091W	19	E09
1668	YLR394W	19	E10
1669	YBR272C	19	E11
1670	YPL066W	19	E12
1671	YGR256W	19	F01
1672	YLR190W	19	F02
1673	YHR113W	19	F03
1674	YLL011W	19	F04
1675	YGR211W	19	F06
1676	YDL089W	19	F07
1677	YOR216C	19	F08
1678	YDR388W	19	F09
1679	YNL071W	19	F10
1680	YKR058W	19	F11
1681	YDR306C	19	F12
1682	YNL124W	19	G01
1683	YML126C	19	G02
1684	YMR070W	19	G03
1685	YLR183C	19	G04
1686	YJR006W	19	G05
1687	YNL137C	19	G06
1688	YHR030C	19	G07
1689	YBR247C	19	G08
1690	YDR524C	19	G09
1691	YOR046C	19	G10
1692	YNR058W	19	G11
1693	YJL123C	19	G12
1694	YOL112W	19	H01
1695	YNL240C	19	H02
1696	YNL022C	19	H03
1697	YMR140W	19	H04
1698	YOR009W	19	H05
1699	YNL277W	19	H06
1700	YIL131C	19	H07
1701	YBR288C	19	H08
1702	YGL097W	19	H09
1703	YOR088W	19	H10
1704	YDR198C	19	H11
1705	YLR238W	19	H12
1706	YGR002C	20	A02
1707	YMR211W	20	A03
1708	YLR212C	20	A04
1709	YOL132W	20	A05
1710	YDR473C	20	A06
1711	YGR212W	20	A07
1712	YGR141W	20	A08
1713	YCL037C	20	A09
1714	YOR177C	20	A11
1715	YDL036C	20	A12
1716	YNL062C	20	B01
1717	YGR117C	20	B02
1718	YLL063C	20	B03
1719	YBR098W	20	B04
1720	YPL235W	20	B05
1721	YER081W	20	B06
1722	YML102W	20	B07
1723	YHR215W	20	B08
1724	YKL184W	20	B09
1725	YPR152C	20	B10
1726	YAL034C	20	B11
1727	YDR023W	20	B12
1728	YOR003W	20	C01
1729	YLR116W	20	C02
1730	YLR288C	20	C03
1731	YDR316W	20	C04
1732	YEL047C	20	C05
1733	YIL074C	20	C06
1734	YPL103C	20	C07
1735	YKL145W	20	C08
1736	YDR219C	20	C09
1737	YPR178W	20	C10
1738	YDR148C	20	C11
1739	YGR004W	20	C12
1740	YLR142W	20	D02
1741	YPR047W	20	D03
1742	YGR019W	20	D04
1743	YMR027W	20	D05
1744	YJL146W	20	D06
1745	YAR071W	20	D07
1746	YFL052W	20	D09
1747	YER038C	20	D10
1748	YDR190C	20	D11
1749	YKL194C	20	D12
1750	YDL103C	20	E01
1751	YOL125W	20	E02
1752	YDR105C	20	E03
1753	YGR108W	20	E04
1754	YOR198C	20	E05
1755	YLR058C	20	E06
1756	YBR092C	20	E07
1757	YGL184C	20	E09
1758	YER089C	20	E10
1759	YGL111W	20	E11
1760	YLR163C	20	E12
1761	YER019W	20	F01
1762	YPL063W	20	F02
1763	YGR288W	20	F03
1764	YHR036W	20	F04
1765	YPR045C	20	F05
1766	YBL056W	20	F06
1767	YBR093C	20	F07
1768	YPR157W	20	F08
1769	YGL256W	20	F09
1770	YML068W	20	F10
1771	YHR018C	20	F11
1772	YML005W	20	F12
1773	YLR341W	20	G01
1774	YIL123W	20	G02
1775	YIL039W	20	G03
1776	YMR223W	20	G04
1777	YPR068C	20	G05
1778	YBR297W	20	G06
1779	YDR223W	20	G07
1780	YMR133W	20	G08
1781	YHL021C	20	G09
1782	YMR293C	20	G10
1783	YKL133C	20	G11
1784	YMR111C	20	G12
1785	YPR034W	20	H01
1786	YMR239C	20	H04
1787	YPR196W	20	H05
1788	YDL024C	20	H06
1789	YEL040W	20	H07
1790	YBL086C	20	H08
1791	YHR146W	20	H09
1792	YOR123C	20	H10
1793	YKL143W	20	H11
1794	YPL003W	20	H12
1795	YDR247W	21	A01
1796	YIR027C	21	A02
1797	YOL041C	21	A03
1798	YOR166C	21	A04
1799	YDR393W	21	A05
1800	YDL091C	21	A06
1801	YDL161W	21	A07
1802	YHR066W	21	A08
1803	YBR166C	21	A09
1804	YBR177C	21	A10
1805	YBR240C	21	A11
1806	YKL046C	21	A12
1807	YLR005W	21	B01
1808	YLR210W	21	B02
1809	YOR056C	21	B03
1810	YPR080W	21	B04
1811	YGR249W	21	B05
1812	YDL216C	21	B06
1813	YOR375C	21	B07
1814	YHR177W	21	B08
1815	YBR182C	21	B09
1816	YJL046W	21	B10
1817	YJL049W	21	B11
1818	YMR210W	21	B12
1819	YMR265C	21	C01
1820	YOR272W	21	C02
1821	YBL082C	21	C03
1822	YAL062W	21	C04
1823	YNL040W	21	C05
1824	YDR364C	21	C06
1825	YPL245W	21	C07
1826	YJR078W	21	C08
1827	YGL194C	21	C09
1828	YKL106W	21	C10
1829	YKL075C	21	C11
1830	YFR005C	21	C12
1831	YPL201C	21	D01
1832	YPL139C	21	D02
1833	YBR118W	21	D03
1834	YDL189W	21	D04
1835	YOR323C	21	D05
1836	YLR195C	21	D06
1837	YPR125W	21	D07
1838	YKL108W	21	D08
1839	YGL215W	21	D09
1840	YML097C	21	D10
1841	YKR042W	21	D11
1842	YGL130W	21	E02
1843	YDL233W	21	E03
1844	YFL037W	21	E04
1845	YPL095C	21	E05
1846	YMR135C	21	E06
1847	YBR095C	21	E07
1848	YLR231C	21	E08
1849	YHL002W	21	E09
1850	YMR220W	21	E10
1851	YOR059C	21	E11
1852	YKR003W	21	E12
1853	YCR005C	21	F01
1854	YGL219C	21	F02
1855	YDR254W	21	F03
1856	YJR062C	21	F04
1857	YPL101W	21	F05
1858	YNL206C	21	F06
1859	YDR125C	21	F07
1860	YJL155C	21	F09
1861	YOL069W	21	F10
1862	YOR155C	21	F11
1863	YLR300W	21	F12
1864	YDR004W	21	G01
1865	YLR090W	21	G02
1866	YJL044C	21	G03
1867	YMR209C	21	G04
1868	YPR084W	21	G05
1869	YOL072W	21	G06
1870	YDR229W	21	G07
1871	YNL016W	21	G08
1872	YNL074C	21	G09
1873	YOR221C	21	G10
1874	YER043C	21	G11
1875	YNL166C	21	G12
1876	YER003C	21	H01
1877	YNL309W	21	H02
1878	YMR191W	21	H03
1879	YDR363W	21	H04
1880	YBR162C	21	H05
1881	YPL146C	21	H06
1882	YDR312W	21	H07
1883	YOR197W	21	H08
1884	YPL049C	21	H09
1885	YPL151C	21	H10
1886	YPR085C	21	H12
1887	YDR515W	22	A01
1888	YHR011W	22	A02
1889	YOR244W	22	A03
1890	YMR268C	22	A04
1891	YMR208W	22	A05
1892	YMR062C	22	A06
1893	YOL059W	22	A07
1894	YGR254W	22	A08
1895	YPL281C	22	A09
1896	YPR163C	22	A10
1897	YPR120C	22	A11
1898	YKL027W	22	B01
1899	YNR050C	22	B02
1900	YOR250C	22	B03
1901	YNL011C	22	B04
1902	YPR106W	22	B05
1903	YCL029C	22	B06
1904	YDR527W	22	B07
1905	YHR001W	22	B08
1906	YBR236C	22	B09
1907	YAR018C	22	B10
1908	YPR148C	22	B11
1909	YOR237W	22	B12
1910	YKR005C	22	C01
1911	YPL133C	22	C02
1912	YDR055W	22	C03
1913	YOR047C	22	C04
1914	YCR079W	22	C05
1915	YDL044C	22	C06
1916	YGR252W	22	C07
1917	YHR174W	22	C08
1918	YBR273C	22	C09
1919	YHR118C	22	C10
1920	YDL097C	22	C11
1921	YPL123C	22	C12
1922	YOL016C	22	D01
1923	YBR279W	22	D02
1924	YDR165W	22	D03
1925	YER130C	22	D04
1926	YDR370C	22	D05
1927	YDL131W	22	D06
1928	YLR085C	22	D07
1929	YMR323W	22	D08
1930	YIL135C	22	D09
1931	YLR113W	22	D10
1932	YDR448W	22	D11
1933	YPL145C	22	D12
1934	YOR025W	22	E01
1935	YDL147W	22	E02
1936	YIL071C	22	E03
1937	YER152C	22	E04
1938	YER061C	22	E05
1939	YDR170W-A	22	E06
1940	YER044C-A	22	E07
1941	YOR187W	22	E08
1942	YLL002W	22	E09
1943	YKL082C	22	E11
1944	YDL084W	22	F01
1945	YGL059W	22	F02
1946	YJL060W	22	F03
1947	YER178W	22	F04
1948	YFL001W	22	F05
1949	YDR449C	22	F06
1950	YBR143C	22	F07
1951	YOR230W	22	F08
1952	YLR203C	22	F09
1953	YMR091C	22	F10
1954	YMR034C	22	F11
1955	YDR277C	22	F12
1956	YFR014C	22	G01
1957	YGR110W	22	G02
1958	YLR080W	22	G03
1959	YKL090W	22	G04
1960	YBL046W	22	G05
1961	YGL164C	22	G06
1962	YDL007W	22	G07
1963	YOR259C	22	G08
1964	YMR240C	22	G09
1965	YOR110W	22	G10
1966	YNL128W	22	G11
1967	YGL134W	22	G12
1968	YHR004C	22	H01
1969	YOR190W	22	H02
1970	YKR044W	22	H04
1971	YKL059C	22	H05
1972	YHR111W	22	H06
1973	YDL133W	22	H07
1974	YOR393W	22	H08
1975	YNR066C	22	H09
1976	YOR301W	22	H10
1977	YOR032C	22	H11
1978	YGR285C	22	H12
1979	YKL161C	23	A01
1980	YGR149W	23	A02
1981	YHR169W	23	A03
1982	YMR173W	23	A04
1983	YPR186C	23	A05
1984	YDL155W	23	A06
1985	YLR321C	23	A07
1986	YGR202C	23	A08
1987	YJR084W	23	A09
1988	YDR005C	23	A10
1989	YER059W	23	A11
1990	YML083C	23	A12
1991	YLR027C	23	B02
1992	YIR012W	23	B03
1993	YOR264W	23	B04
1994	YDL066W	23	B05
1995	YGR244C	23	B06
1996	YMR068W	23	B07
1997	YGR263C	23	B08
1998	YML080W	23	B09
[truncated: 3,673 more rows]
