# Supplementary material for: Global analysis of protein homomerization in Saccharomyces cerevisiae
Source: HighWire-hosted journal article supplement (doi:10.1101/gr.231860.117), 2018-12-19
Supplement: Supplemental_Tables.zip [file Supplemental_Table_S4.xlsx]

## Sheet: Sheet1
Supplemental Table S4. False-positive homomer candidates from self-assembly analysis. 444 false-positive homomer candidates that showed self-assembly signal with free VN are listed. Yellow boxes indicate those candidates which showed different localization pattern between the BiFC signal of homomer and that of self-assembly.
Number	Gene	ORF	Known homomer	References
1	AAP1	YHR047C
2	ACO1	YLR304C	ν	Babu M, et al. (2012)
3	ACS2	YLR153C
4	ADE17	YMR120C	ν	Tarassov K, et al. (2008)
5	ADE5,7	YGL234W
6	ADH2	YMR303C
7	AGP1	YCL025C	ν	Miller JP, et al. (2005)
8	AIM3	YBR108W	ν	Alberti S, et al. (2009)
9	AKR1	YDR264C	ν	Tarassov K, et al. (2008)
10	ALA1	YOR335C	ν	Krogan NJ, et al. (2004)
11	ALD4	YOR374W	ν	Babu M, et al. (2012)
12	ALD5	YER073W
13	ALO1	YML086C	ν	Tarassov K, et al. (2008)
14	ARB1	YER036C
15	ARC1	YGL105W
16	ARC15	YIL062C
17	ARG1	YOL058W
18	ARL1	YBR164C
19	ARO3	YDR035W
20	ARP6	YLR085C
21	ARX1	YDR101C	ν	Krogan NJ, et al. (2004)
22	ASE1	YOR058C
23	ASN2	YGR124W
24	ATG13	YPR185W
25	ATG21	YPL100W
26	ATO3	YDR384C
27	ATP1	YBL099W
28	ATP14	YLR295C	ν	Fronzes R, et al. (2006)
29	ATP17	YDR377W
30	ATX2	YOR079C
31	AUA1	YFL010W-A
32	AVL9	YLR114C
33	BAP2	YBR068C
34	BAT1	YHR208W	ν	Lopez G, et al. (2015)
35	BDF1	YLR399C
36	BFR1	YOR198C	ν	Babu M, et al. (2012)
37	BFR2	YDR299W
38	BMH1	YER177W
39	BRE1	YDL074C	ν	Newman JR, et al. (2000)
40	BSC3	YLR465C
41	BTN2	YGR142W
42	BUD6	YLR319C	ν	Amberg DC, et al. (1997)
43	CAM1	YPL048W
44	CAR1	YPL111W	ν	Uetz P, et al. (2000)
45	CAR2	YLR438W
46	CBF1	YJR060W	ν	Oechsner U and Bandlow W (1998)
47	CBF5	YLR175W
48	CDC10	YCR002C	ν	Versele M, et al. (2004)
49	CDC11	YJR076C	ν	Lee PR, et al. (2002)
50	CDC14	YFR028C	ν	Grandin N, et al. (1998)
51	CDC19	YAL038W
52	CDC6	YJL194W
53	CDC9	YDL164C
54	CET1	YPL228W	ν	Lima CD, et al. (1999)
55	CHC1	YGL206C
56	CHL1	YPL008W
57	CHS5	YLR330W	ν	Tarassov K, et al. (2008)
58	CIT3	YPR001W
59	CLC1	YGR167W
60	COX15	YER141W
61	COX4	YGL187C
62	COX5A	YNL052W
63	COX8	YLR395C
64	CPA2	YJR109C
65	CRN1	YLR429W	ν	Newman JR, et al. (2000)
66	CRP1	YHR146W
67	CSS1	YIL169C
68	CTF3	YLR381W
69	CTR2	YHR175W	ν	Tarassov K, et al. (2008)
70	CWP1	YKL096W
71	CYC8	YBR112C	ν	Alberti S, et al. (2009)
72	CYS3	YAL012W	ν	Messerschmidt A, et al. (2003)
73	DAD4	YDR320C-A
74	DBP3	YGL078C	ν	Krogan NJ, et al. (2004)
75	DBP5	YOR046C
76	DEF1	YKL054C	ν	Tarassov K, et al. (2008)
77	DHR2	YKL078W
78	DLD2	YDL178W
79	DOP1	YDR141C	ν	Barbosa S, et al. (2010)
80	DST1	YGL043W	ν	Krogan NJ, et al. (2004)
81	DYS1	YHR068W	ν	Yu H, et al. (2008)
82	EFG1	YGR271C-A
83	EGD2	YHR193C
84	EHD3	YDR036C
85	ENO1	YGR254W	ν	Wedekind JE, et al. (1994)
86	ENO2	YHR174W	ν	Kornblatt MJ, et al. (2004)
87	ENP1	YBR247C	ν	Grandi P, et al. (2002)
88	ERG1	YGR175C
89	ERG10	YPL028W	ν	Huang KY, et al. (2009)
90	ERG13	YML126C
91	ERG7	YHR072W
92	ESF2	YNR054C	ν	Hoang T, et al. (2005)
93	ESS1	YJR017C
94	ETT1	YOR051C
95	EXO70	YJL085W	ν	Hamburger ZA, et al. (2006)
96	FAA4	YMR246W	ν	Babu M, et al. (2012)
97	FAS1	YKL182W	ν	Babu M, et al. (2012)
98	FAS2	YPL231W	ν	Johansson P, et al. (2008)
99	FBA1	YKL060C
100	FIG4	YNL325C
101	FLX1	YIL134W
102	FPR1	YNL135C
103	FPR3	YML074C
104	FPR4	YLR449W	ν	Edlich-Muth C, et al. (2015)
105	FTH1	YBR207W	ν	Tarassov K, et al. (2008)
106	FUN12	YAL035W
107	FUN30	YAL019W	ν	Awad S, et al. (2010)
108	GAS1	YMR307W
109	GCD10	YNL062C
110	GCD7	YLR291C	ν	Yu H, et al. (2008)
111	GDH1	YOR375C	ν	Huang KY, et al. (2009)
112	GIS1	YDR096W	ν	Quan Z, et al. (2011)
113	GLO3	YER122C
114	GMH1	YKR030W
115	GND1	YHR183W	ν	He W, et al. (2007)
116	GNP1	YDR508C
117	GPB1	YOR371C
118	GPP1	YIL053W
119	GRS1	YBR121C
120	GSY2	YLR258W	ν	Ito T, et al. (2001)
121	GTT2	YLL060C	ν	Choi JH, et al. (1998)
122	GUS1	YGL245W
123	GYL1	YMR192W
124	HCA4	YJL033W	ν	Krogan NJ, et al. (2004)
125	HMO1	YDR174W	ν	Yu H, et al. (2008)
126	HOM6	YJR139C	ν	DeLaBarre B, et al. (2000)
127	HSC82	YMR186W	ν	Marino-Ramirez L and Hu JC (2002)
128	HSP104	YLL026W	ν	Parsell DA, et al. (1994)
129	HSP12	YFL014W
130	HSP82	YPL240C	ν	Prodromou C, et al. (1997)
131	HUL4	YJR036C
132	HXK1	YFR053C	ν	Maity H, et al. (2000)
133	HXT1	YHR094C	ν	Tarassov K, et al. (2008)
134	HXT3	YDR345C
135	ICS2	YBR157C
136	IDH2	YOR136W
137	ILV2	YMR108W	ν	Pang SS, et al. (2002)
138	IMD3	YLR432W	ν	Krogan NJ, et al. (2004)
139	IMD4	YML056C	ν	Tarassov K, et al. (2008)
140	INH1	YDL181W
141	ITC1	YGL133W
142	ITR1	YDR497C	ν	Tarassov K, et al. (2008)
143	KAP95	YLR347C	ν	Krogan NJ, et al. (2004)
144	KCS1	YDR017C	ν	Babu M, et al. (2012)
145	KEI1	YDR367W
146	KEL1	YHR158C	ν	Philips J and Herskowitz I(1998)
147	KGD2	YDR148C	ν	Marino-Ramirez L and Hu JC (2002)
148	KIC1	YHR102W
149	KIP3	YGL216W
150	LEU1	YGL009C
151	LEU4	YNL104C	ν	Yu H, et al. (2008)
152	LEU9	YOR108W	ν	Yu H, et al. (2008)
153	LIA1	YJR070C
154	LRG1	YDL240W
155	LSP1	YPL004C	ν	Karotki L, et al. (2011)
156	LST4	YKL176C
157	LYS12	YIL094C
158	LYS2	YBR115C
159	LYS20	YDL182W	ν	Tarassov K, et al. (2008)
160	LYS21	YDL131W	ν	Tarassov K, et al. (2008)
161	MAK21	YDR060W	ν	Krogan NJ, et al. (2004)
162	MAM33	YIL070C	ν	Pu YG, et al. (2011)
163	MBF1	YOR298C-A
164	MCM3	YEL032W	ν	Lei M, et al. (1996)
165	MDM38	YOL027C
166	MET6	YER091C
167	MIC12	YBR262C
168	MIP1	YOR330C
169	MKK2	YPL140C
170	MMF1	YIL051C	ν	Pu YG, et al. (2011)
171	MRI1	YPR118W	ν	Bumann M, et al. (2004)
172	MRP1	YDR347W
173	MRP10	YDL045W-A
174	MRP4	YHL004W
175	MRT4	YKL009W
176	MSC6	YOR354C
177	MSH3	YCR092C
178	MSH6	YDR097C
179	MTR4	YJL050W	ν	Krogan NJ, et al. (2004)
180	MUP1	YGR055W	ν	Tarassov K, et al. (2008)
181	NCB2	YDR397C	ν	Yu H, et al. (2008)
182	NCE102	YPR149W
183	NDC80	YIL144W	ν	Newman JR, et al. (2000)
184	NDE1	YMR145C
185	NDI1	YML120C	ν	Feng Y, et al. (2012)
186	NET1	YJL076W
187	NEW1	YPL226W	ν	Alberti S, et al. (2009)
188	NHP6A	YPR052C
189	NHP6B	YBR089C-A
190	NIC96	YFR002W
191	NIP1	YMR309C	ν	Krogan NJ, et al. (2004)
192	NIP7	YPL211W
193	NOC2	YOR206W	ν	Krogan NJ, et al. (2004)
194	NOC4	YPR144C	ν	Jakob S, et al. (2012)
195	NOP13	YNL175C
196	NOP16	YER002W
197	NOP56	YLR197W	ν	Boulon S, et al. (2008)
198	NOP7	YGR103W	ν	Krogan NJ, et al. (2004)
199	NPL3	YDR432W	ν	Krogan NJ, et al. (2004)
200	NSA1	YGL111W	ν	Kressler D, et al. (2008)
201	NSR1	YGR159C	ν	Krogan NJ, et al. (2004)
202	NUD1	YOR373W	ν	Elliott S, et al. (1999)
203	NUF2	YOL069W	ν	Wang Y, et al. (2012)
204	NUP133	YKR082W
205	NUP145	YGL092W	ν	Ratner GA, et al. (2007)
206	NUP159	YIL115C
207	NUP2	YLR335W
208	OAF1	YAL051W	ν	Rottensteiner H, et al. (1997)
209	OLA1	YBR025C	ν	Krogan NJ, et al. (2004)
210	OM14	YBR230C
211	PAN1	YIR006C	ν	Miliaras NB, et al. (2004)
212	PBI2	YNL015W
213	PCS60	YBR222C	ν	Tarassov K, et al. (2008)
214	PDA1	YER178W
215	PEP5	YMR231W	ν	Srivastava A, et al. (2000)
216	PEX1	YKL197C
217	PEX11	YOL147C	ν	Marshall PA, et al. (1996)
218	PEX25	YPL112C	ν	Tam YY, et al. (2003)
219	PFK1	YGR240C	ν	Yu H, et al. (2008)
220	PFK2	YMR205C
221	PGI1	YBR196C	ν	Babu M, et al. (2012)
222	PGK1	YCR012W	ν	Osvath S, et al. (2006)
223	PMP1	YCR024C-A
224	PMP3	YDR276C
225	POL5	YEL055C
226	POX1	YGL205W
227	PRP43	YGL120C	ν	Tarassov K, et al. (2008)
228	PRY3	YJL078C
229	PST2	YDR032C	ν	Uetz P, et al. (2000)
230	PUB1	YNL016W	ν	Alberti S, et al. (2009)
231	PUF6	YDR496C	ν	Krogan NJ, et al. (2004)
232	PUT2	YHR037W	ν	Babu M, et al. (2012)
233	PWP2	YCR057C
234	PYC2	YBR218C
235	QCR8	YJL166W
236	QCR9	YGR183C
237	QDR3	YBR043C
238	RAD26	YJR035W
239	RAD54	YGL163C
240	RCL1	YOL010W	ν	Grandi P, et al. (2002)
241	RIX1	YHR197W
242	RIX7	YLL034C	ν	Tarassov K, et al. (2008)
243	RLI1	YDR091C	ν	Krogan NJ, et al. (2004)
244	RNA1	YMR235C
245	RNR1	YER070W	ν	Zhao X, et al. (1998)
246	RNR3	YIL066C	ν	Domkin V, et al. (2002)
247	RNR4	YGR180C	ν	Ge J, et al. (2001)
248	RPA43	YOR340C
249	RPB8	YOR224C
250	RPC19	YNL113W
251	RPC40	YPR110C	ν	Krogan NJ, et al. (2004)
252	RPC53	YDL150W
253	RPF2	YKR081C	ν	Sahasranaman A, et al. (2011)
254	RPG1	YBR079C
255	RPL11A	YPR102C
256	RPL12B	YDR418W
257	RPL13A	YDL082W
258	RPL13B	YMR142C
259	RPL14B	YHL001W
260	RPL18B	YNL301C
261	RPL1B	YGL135W
262	RPL20A	YMR242C
263	RPL21B	YPL079W
264	RPL22A	YLR061W
265	RPL24A	YGL031C
266	RPL26B	YGR034W
267	RPL2A	YFR031C-A
268	RPL31B	YLR406C
269	RPL36B	YPL249C-A
270	RPL37A	YLR185W
271	RPL43A	YPR043W
272	RPL6B	YLR448W
273	RPL7B	YPL198W
274	RPL8B	YLL045C
275	RPL9A	YGL147C
276	RPL9B	YNL067W
277	RPP1B	YDL130W	ν	Qiu D, et al. (2006)
278	RPP2A	YOL039W	ν	Qiu D, et al. (2006)
279	RPP2B	YDR382W	ν	Qiu D, et al. (2006)
280	RPS10B	YMR230W
281	RPS17A	YML024W
282	RPS17B	YDR447C
283	RPS1A	YLR441C
284	RPS1B	YML063W
285	RPS22A	YJL190C
286	RPS22B	YLR367W
287	RPS25B	YLR333C
288	RPS27A	YKL156W
289	RPS28A	YOR167C
290	RPS28B	YLR264W
291	RPS3	YNL178W
292	RPS30B	YOR182C
293	RPS4B	YHR203C
294	RPS6A	YPL090C
295	RPS7B	YNL096C
296	RPS9A	YPL081W
297	RRP1	YDR087C	ν	Horsey EW, et al. (2004)
298	RRP5	YMR229C	ν	Krogan NJ, et al. (2004)
299	RSE1	YML049C
300	RSM24	YDR175C
301	RSM27	YGR215W
302	RTC3	YHR087W
303	RTC6	YPL183W-A
304	RVB1	YDR190C
305	SAC6	YDR129C
306	SAM1	YLR180W	ν	Yu H, et al. (2008)
307	SAM2	YDR502C	ν	Yu H, et al. (2008)
308	SAM50	YNL026W
309	SCS22	YBL091C-A
310	SEC21	YNL287W
311	SEC27	YGL137W
312	SEC5	YDR166C	ν	TerBush DR, et al. (1996)
313	SEC6	YIL068C	ν	Toikkanen JH, et al. (2003)
314	SEC63	YOR254C	ν	Willer M, et al. (2003)
315	SEC7	YDR170C	ν	Marino-Ramirez L and Hu JC (2002)
316	SEC72	YLR292C	ν	Miller JP, et al. (2005)
317	SED1	YDR077W
318	SFC1	YJR095W
319	SHE3	YBR130C	ν	Tarassov K, et al. (2008)
320	SHM1	YBR263W
321	SHS1	YDL225W	ν	Tarassov K, et al. (2008)
322	SIS1	YNL007C	ν	Sha B, et al. (2000)
323	SKG6	YHR149C
324	SLA1	YBL007C	ν	Di Pietro SM, et al. (2010)
325	SLK19	YOR195W	ν	Newman JR, et al. (2000)
326	SMC4	YLR086W
327	SMI1	YGR229C
328	SNA3	YJL151C	ν	Tarassov K, et al. (2008)
329	SNA4	YDL123W
330	SND1	YDR186C
331	SNF5	YBR289W	ν	Alberti S, et al. (2009)
332	SOD1	YJR104C	ν	Djinovic K, et al. (1991)
333	SOF1	YLL011W
334	SPC105	YGL093W	ν	Wang Y, et al. (2012
335	SPC97	YHR172W
336	SPP41	YDR464W
337	SPT16	YGL207W	ν	Krogan NJ, et al. (2004)
338	SPT4	YGR063C
339	SPT5	YML010W
340	SRM1	YGL097W
341	SRO9	YCL037C
342	SSB1	YDL229W
343	SSB2	YNL209W	ν	Willmund F, et al. (2013)
344	SSF1	YHR066W	ν	Fatica A, et al. (2002)
345	STF2	YGR008C
346	STI1	YOR027W	ν	Tarassov K, et al. (2008)
347	STM1	YLR150W
348	STO1	YMR125W	ν	Krogan NJ, et al. (2004)
349	STU2	YLR045C	ν	Chen XP, et al. (1998)
350	SUL1	YBR294W
351	SUL2	YLR092W
352	SUP35	YDR172W	ν	Krogan NJ, et al. (2004)
353	SUR7	YML052W
354	SWI6	YLR182W
355	SYP1	YCR030C	ν	Tarassov K, et al. (2008)
356	TAL1	YLR354C
357	TCD2	YKL027W
358	TDH1	YJL052W
359	TDH2	YJR009C
360	TDH3	YGR192C	ν	Huang KY, et al. (2009)
361	TEF4	YKL081W
362	TEL1	YBL088C
363	TGL1	YKL140W	ν	Tarassov K, et al. (2008)
364	THR4	YCR053W
365	THS1	YIL078W	ν	Krogan NJ, et al. (2004)
366	TIF3	YPR163C
367	TIF4631	YGR162W	ν	Krogan NJ, et al. (2004)
368	TIF5	YPR041W
369	TIM50	YPL063W	ν	Geissler A, et al. (2002)
370	TKL1	YPR074C	ν	Selivanov VA, et al. (2004)
371	TMA19	YKL056C
372	TOF1	YNL273W
373	TPA1	YER049W	ν	Krogan NJ, et al. (2004)
374	TPS1	YBR126C	ν	Reinders A, et al. (1997)
375	TPS2	YDR074W	ν	Reinders A, et al. (1997)
376	TRP2	YER090W
377	TSC11	YER093C	ν	Babu M, et al. (2012)
378	TUF1	YOR187W
379	TUP1	YCR084C	ν	Jabet C, et al. (2000)
380	TYW1	YPL207W
381	UBA1	YKL210W	ν	Sommer T and Jentsch S (1993)
382	UBX7	YBR273C	ν	Decottignies A, et al. (2004)
383	UGP1	YKL035W	ν	Marino-Ramirez L and Hu JC (2002)
384	URA1	YKL216W
385	URA2	YJL130C
386	URB1	YKL014C	ν	Krogan NJ, et al. (2004)
387	URB2	YJR041C
388	UTP10	YJL109C	ν	Krogan NJ, et al. (2004)
389	UTP13	YLR222C	ν	Krogan NJ, et al. (2004)
390	UTP15	YMR093W
391	UTP18	YJL069C	ν	Grandi P, et al. (2002)
392	UTP9	YHR196W	ν	Grandi P, et al. (2002)
393	VIK1	YPL253C
394	VMA1	YDL185W
395	VMA13	YPR036W	ν	Tarassov K, et al. (2008)
396	VPH1	YOR270C	ν	Diepholz M, et al. (2008)
397	VPS4	YPR173C	ν	Scott A, et al. (2005)
398	WRS1	YOL097C
399	YBR085C-A	YBR085C-A
400	YDL009C	YDL009C
401	YDL163W	YDL163W
402	YDR102C	YDR102C
403	YDR210W	YDR210W
404	YDR269C	YDR269C
405	YDR290W	YDR290W
406	YDR340W	YDR340W
407	YDR355C	YDR355C
408	YDR467C	YDR467C
409	YEF3	YLR249W
410	YEL077C	YEL077C
411	YEL1	YBL060W
412	YGL239C	YGL239C
413	YGR011W	YGR011W
414	YGR139W	YGR139W
415	YGR283C	YGR283C	ν	Krogan NJ, et al. (2004)
416	YHB1	YGR234W	ν	Babu M, et al. (2012)
417	YHM2	YMR241W
418	YLH47	YPR125W
419	YLL020C	YLL020C
420	YLR230W	YLR230W
421	YLR294C	YLR294C
422	YME2	YMR302C
423	YML018C	YML018C
424	YML084W	YML084W
425	YMR144W	YMR144W
426	YMR153C-A	YMR153C-A
427	YNL063W	YNL063W
428	YNL144C	YNL144C
429	YNL190W	YNL190W
430	YOL134C	YOL134C
431	YOP1	YPR028W	ν	Shibata Y, et al. (2008)
432	YOR022C	YOR022C
433	YOR248W	YOR248W
434	YOR296W	YOR296W
435	YPL080C	YPL080C
436	YPR039W	YPR039W
437	YPR098C	YPR098C
438	YRO2	YBR054W	ν	Miller JP, et al. (2005)
439	YSP2	YDR326C
440	YTA7	YGR270W	ν	Lambert JP, et al. (2009)
441	ZAP1	YJL056C
442	ZRC1	YMR243C
443	ZUO1	YGR285C
444	ZWF1	YNL241C	ν	Ravera S, et al. (2010)
