# Supplementary material for: Global analysis of protein homomerization in Saccharomyces cerevisiae
Source: HighWire-hosted journal article supplement (doi:10.1101/gr.231860.117), 2018-12-19
Supplement: Supplemental_Tables.zip [file Supplemental_Table_S5.xlsx]

## Sheet: supp tbl 1
Supplemental Table S5. Protein homomer candidates identified in this study. 186 homomer candidates are listed with information about known or novel homomer. Subcellular localization of each candidate annotated in the Yeast GFP Fusion Localization Database (https://yeastgfp.yeastgenome.org) and reported in other previous studies is also presented. Overlaps of BiFC signals with GFP signals are indi…
Gene	ORF	Known	Novel	GFP localizationa	Overlap of BiFC with GFP	BiFC intensity
AAT2	YLR027C	ν		cytoplasm	same	1027526
ABP140	YOR239W	ν		actin*	same	2.29617e+06
ACO2	YJL200C	ν		mitochondrion	same	1793338
ACS1	YAL054C	ν		cytoplasm, nucleus	same	2.27811e+06
ALD6	YPL061W	ν		cytoplasm, nucleus	same	2.06213e+07
ANY1	YMR010W	ν		punctate, early Golgi	same	2.85499e+06
APL4	YPR029C	ν		punctate	same	1911197
APL6	YGR261C	ν		punctate, Golgi, early Golgi	same	1.7462e+06
ATP10	YLR393W	ν		mitochondrion	same	1.62167e+06
BCP1	YDR361C	ν		cytoplasm, nucleus	same	1.29696e+06
CPR1	YDR155C	ν		cytoplasm, nucleus	same	8.67963e+06
CYS4	YGR155W	ν		cytoplasm	partial	1.02061e+07
DAD3	YBR233W-A	ν		spindle pole	same	1.6634e+06
DCP2	YNL118C	ν		punctate	same	2.0017e+06
DID2	YKR035W-A	ν		endosome	same	897249
DPP1	YDR284C	ν		vacuolar membrane	same	1.94985e+06
EDE1	YBL047C	ν		punctate	same	3.6286e+06
EMP24	YGL200C	ν		punctate	same	1.70092e+06
ERP1	YAR002C-A	ν		vacuolar membrane	same	1317516
ERV25	YML012W	ν		ER	same	1.95082e+06
FBP1	YLR377C	ν		NAb	punctate foci	2.29053e+06
GCD1	YOR260W	ν		cytoplasm	partial	1.52507e+06
GCD11	YER025W	ν		cytoplasm	same	2.16533e+06
GCD6	YDR211W	ν		cytoplasm	partial	1.96341e+06
GIN4	YDR507C	ν		bud neck, cytoplasm, bud	same	1.48495e+06
GLE1	YDL207W	ν		nuclear periphery	same	1.94439e+06
GLK1	YCL040W	ν		cytoplasm, punctate	same	1894332
GLT1	YDL171C	ν		ambiguous	same	3.07316e+06
HOM3	YER052C	ν		cytoplasm	same	2.26685e+06
HSP42	YDR171W	ν		cytoplasm	same	1.53196e+06
ILV1	YER086W	ν		mitochondrion	same	1.89121e+06
KES1	YPL145C	ν		cytoplasm	partial	1.68804e+06
KGD1	YIL125W	ν		mitochondrion	same	2.58108e+06
LOC1	YFR001W	ν		nucleolus, nucleus	same	1.53278e+06
LSB3	YFR024C-A	ν		bud neck, cytoplasm, mitochondrion, cell periphery	same	1.86823e+06
LSM1	YJL124C	ν		cytoplasm	partial	683210
MCM1	YMR043W	ν		nucleus	same	2.21397e+06
MDH2	YOL126C	ν		peroxisome	same	1.00345e+06
MDJ1	YFL016C	ν		mitochondrion	same	1.05802e+06
MDV1	YJL112W	ν		mitochondrion	same	1.80931e+06
MEH1	YKR007W	ν		vacuolar membrane	same	742044
MST27	YGL051W	ν		NA	ambiguous	1.78526e+06
MYO2	YOR326W	ν		bud neck, cytoplasm, cell periphery, bud	same	2.20704e+06
MYO4	YAL029C	ν		bud neck, cytoplasm, cell periphery, bud	same	1.40935e+06
MYO5	YMR109W	ν		actin	same	2.1777e+06
NAB2	YGL122C	ν		nucleus	partial	1.98349e+06
NHP10	YDL002C	ν		nucleus	same	1.64557e+06
NOC3	YLR002C	ν		nucleolus, nucleus	same	1.74712e+06
NOP15	YNL110C	ν		nucleolus, nucleus	same	2.09076e+06
OLE1	YGL055W	ν		ER	same	2112716
PEX6	YNL329C	ν		peroxisome	same	1.42747e+06
PIM1	YBL022C	ν		mitochondrion	same	1.91052e+06
POM33	YLL023C	ν		ER	same	740012
PRO3	YER023W	ν		cytoplasm	same	3.45698e+06
RAD51	YER095W	ν		cytoplasm, nucleus	same	4.48977e+06
RBD2	YPL246C	ν		Golgi, early Golgi	same	2.04616e+06
RGD2	YFL047W	ν		bud neck, cytoplasm, cell periphery	same	2.11841e+06
RRP42	YDL111C	ν		cytoplasm, nucleolus, nucleus	same	1.67032e+06
RTN2	YDL204W	ν		ER	same	2.59571e+06
RVS167	YDR388W	ν		actin	same	1.2687e+06
SCO2	YBR024W	ν		NA	ambiguous	1.62692e+06
SEC3	YER008C	ν		bud neck, cell periphery, bud	same	1.89541e+06
SEY1	YOR165W	ν		punctate	same	2.36705e+06
SGF29	YCL010C	ν		nucleus	same	1.67701e+06
SLM4	YBR077C	ν		vacuolar membrane	same	865243
SNF7	YLR025W	ν		endosome	same	2.10465e+06
SPC24	YMR117C	ν		spindle pole	same	1.65771e+06
SRP1	YNL189W	ν		cytoplasm, nuclear periphery	partial	2.40467e+06
TGL3	YMR313C	ν		punctate, lipid particle	same	1.94065e+06
TIM11	YDR322C-A	ν		mitochondrion	same	2.2708e+06
TRM1	YDR120C	ν		nuclear periphery, nucleus	same	2.25159e+06
TRS33	YOR115C	ν		punctate	same	2.04051e+06
TSA1	YML028W	ν		cytoplasm, punctate	same	9.46179e+06
TVP15	YDR100W	ν		early Golgi	same	1.5096e+06
URA7	YBL039C	ν		cytoplasm	partial	3.25516e+06
UTP8	YGR128C	ν		nucleolus	same	2.165e+06
VMA21	YGR105W	ν		vacuole	same	1.68619e+06
VPS35	YJL154C	ν		vacuolar membrane, endosome	same	1.43096e+06
VPS5	YOR069W	ν		endosome	same	1.76453e+06
VPS60	YDR486C	ν		vacuolar membrane	same	2.10555e+06
WTM1	YOR230W	ν		nucleus, anti-nucleolar nucleus	same	3.07187e+06
XRN1	YGL173C	ν		cytoplasm	partial	3.36217e+06
ADK2	YER170W		ν	mitochondrion	same	1.79666e+06
AIM17	YHL021C		ν	mitochondrion	same	631011
AIM24	YJR080C		ν	mitochondrion	same	2.53746e+06
AIP1	YMR092C		ν	actin	same	630661
ALB1	YJL122W		ν	nucleus	same	1.29315e+06
ALT1	YLR089C		ν	NA	mitochondrion	1.55919e+06
ANT1	YPR128C		ν	peroxisome	same	1.85098e+06
APL2	YKL135C		ν	late Golgi	same	1.65426e+06
APL5	YPL195W		ν	early Golgi	same	1.80532e+06
ARC35	YNR035C		ν	actin	same	1.81687e+06
ARO4	YBR249C		ν	cytoplasm, nucleus	partial	1.2908e+06
ATG8	YBL078C		ν	NA	punctate foci	336084
ATP19	YOL077W-A		ν	mitochondrion	same	2.06776e+06
ATP3	YBR039W		ν	mitochondrion	same	1.9281e+06
BSC2	YDR275W		ν	lipid particle	same	1.88702e+06
BUR6	YER159C		ν	nucleus	same	1.99106e+06
BXI1	YNL305C		ν	vacuole	same	1.8441e+06
CAF120	YNL278W		ν	bud neck, cytoplasm, bud	same	1.29428e+06
CBP3	YPL215W		ν	mitochondrion	same	1.78792e+06
COQ3	YOL096C		ν	mitochondria	same	1.80471e+06
COX7	YMR256C		ν	mitochondrion	same	2.09514e+06
CYT1	YOR065W		ν	mitochondrion	same	1.79659e+06
DDR2	YOL052C-A		ν	cytoplasm, vacuole	same	1.67466e+06
DPM1	YPR183W		ν	ER	same	2.17829e+06
ELF1	YKL160W		ν	nucleus	same	1.70183e+06
ELO2	YCR034W		ν	ER	same	1.78785e+06
ENT5	YDR153C		ν	late Golgi	same	2.11685e+06
FAA1	YOR317W		ν	ER	same	3.39671e+06
FCY2	YER056C		ν	vacuole	same	1.81808e+06
FSF1	YOR271C		ν	mitochondrion	same	1.50381e+06
GCV2	YMR189W		ν	mitochondrion	same	2.42878e+06
GDH2	YDL215C		ν	cytoplasm	same	2.89856e+06
GEA1	YJR031C		ν	Golgi	same	831203
GEM1	YAL048C		ν	NA	ambiguous	1.59935e+06
GLY1	YEL046C		ν	cytoplasm, nucleus	same	8.15515e+06
GVP36	YIL041W		ν	Golgi**	same	4.7437e+06
ILV6	YCL009C		ν	mitochondrion	same	3.00394e+06
INP53	YOR109W		ν	punctate	same	1.63618e+06
IVY1	YDR229W		ν	vacuolar membrane	same	1022127
JIP5	YPR169W		ν	nucleolus, nucleus	same	1.40878e+06
KAP123	YER110C		ν	cytoplasm, nucleus	partial	2.78994e+06
LAM6	YLR072W		ν	mitochondrion, punctate	same	1.64657e+06
LPD1	YFL018C		ν	mitochondrion	same	3.30454e+06
MAP1	YLR244C		ν	cytoplasm, nucleus	partial	582213
MCX1	YBR227C		ν	mitochondrion	partial	1.6819e+06
MDH1	YKL085W		ν	mitochondrion	same	8.10106e+06
MDM12	YOL009C		ν	mitochondrion	same	1.3141e+06
MET10	YFR030W		ν	cytoplasm	same	1.54359e+06
MET14	YKL001C		ν	cytoplasm	same	671142
MIC19	YFR011C		ν	cytoplasm, mitochondrion	same	1.79305e+06
MRPL19	YNL185C		ν	mitochondrion	same	1.61474e+06
MSB3	YNL293W		ν	ambiguous	same	1.59678e+06
MSS116	YDR194C		ν	mitochondrion	same	2.42146e+06
NCL1	YBL024W		ν	nucleus	same	1.61062e+06
NCW1	YMR122W-A		ν	ER, cytoplasm	partial	1.94936e+06
NUP60	YAR002W		ν	nuclear periphery	same	3.09499e+06
PFD1	YJL179W		ν	cytoplasm	same	1.65481e+06
PGA3	YML125C		ν	ER	same	1.73528e+06
PHB1	YGR132C		ν	mitochondrion	same	1.55869e+06
PHO84	YML123C		ν	ER	same	1.84755e+06
PLN1	YKR046C		ν	lipid particle	same	1.96839e+06
PMC1	YGL006W		ν	vacuolar membrane	same	1.93569e+06
PPS1	YBR276C		ν	NA	ambiguous	1.65031e+06
PSE1	YMR308C		ν	cytoplasm, nucleus	partial	1.36622e+06
PSG1	YKL077W		ν	vacuole	same	2.33087e+06
QCR10	YHR001W-A		ν	mitochondrion	same	1.61643e+06
RAI1	YGL246C		ν	nucleus	same	1.66697e+06
RDL1	YOR285W		ν	ER	same	718186
RGD1	YBR260C		ν	bud neck, cytoplasm, bud	same	1.52599e+06
RHO5	YNL180C		ν	endomembrane system***	same	1.9315e+06
ROM2	YLR371W		ν	bud neck, cytoplasm, bud	same	1.60162e+06
RPL7A	YGL076C		ν	cytoplasm	same	1.51695e+07
RPS18B	YML026C		ν	cytoplasm	same	2221056
RPS24B	YIL069C		ν	cytoplasm	same	2.19598e+06
RRP17	YDR412W		ν	nucleolus, nucleus	same	1.95118e+06
RRT8	YOL048C		ν	lipid particle	same	1.18712e+06
RVS161	YCR009C		ν	cytoplasm, actin	same	1.90737e+06
SDH4	YDR178W		ν	mitochondrion	same	1.74597e+06
SET2	YJL168C		ν	nucleus	same	2.54834e+06
SHM2	YLR058C		ν	cytoplasm, nucleus	same	1.29054e+07
SLC1	YDL052C		ν	ER	partial	2.11734e+06
SMX2	YFL017W-A		ν	nucleus	same	1.60426e+06
SNC2	YOR327C		ν	vacuole	same	1.87634e+06
SOL2	YCR073W-A		ν	cytoplasm	partial	3.29312e+06
SSP120	YLR250W		ν	punctate, Golgi, early Golgi	same	1.69294e+06
TIP1	YBR067C		ν	ER	same	1.62746e+06
TRX2	YGR209C		ν	cytoplasm, nucleus	same	3.72757e+06
UTP30	YKR060W		ν	nucleolus, nucleus	partial	1.71506e+06
UTP5	YDR398W		ν	nucleolus	same	1.72376e+06
UTR2	YEL040W		ν	ER	same	3.64782e+06
VID27	YNL212W		ν	cytoplasm	partial	1.86335e+06
VPS16	YPL045W		ν	vacuolar membrane	same	2.05939e+06
YAH1	YPL252C		ν	mitochondrion	same	1.61882e+06
YAR044W	YAR044W		ν	punctate	same	502587
YER156C	YER156C		ν	cytoplasm, nucleus	same	3.03324e+06
YHR127W	YHR127W		ν	nucleus	same	1.91339e+06
YLL067C	YLL067C		ν	NA	ambiguous	1.26312e+06
YLR257W	YLR257W		ν	cytoplasm	partial	3.09775e+06
YML009C-A	YML009C-A		ν	NA	ambiguous	1.6041e+06
YPL162C	YPL162C		ν	vacuolar membrane	same	1.71798e+06
YPR090W	YPR090W		ν	late Golgi	same	1.65071e+06
YPR097W	YPR097W		ν	ambiguous	partial	1.6196e+06
YPQ1	YOL092W		ν	vacuolar membrane	same	1482482
ZPR1	YGR211W		ν	cytoplasm, nucleus	same	1.32606e+06
MDS3c	YGL197W					140997
aHuh WK, Falvo JV, Gerke LC, Carroll AS, Howson RW, Weissman JS, O'Shea EK. 2003. Global analysis of protein localization in budding yeast. Nature 425: 686-691.
bNA: not available
cNegative control
*Asakura T, Sasaki T, Nagano F, Satoh A, Obaishi H, Nishioka H, Imamura H, Hotta K, Tanaka K, Nakanishi H et al. 1998. Isolation and characterization of a novel actin filament-binding protein from Saccharomyces cerevisiae. Oncogene 16: 121-130.
**Inadome H, Noda Y, Adachi H, Yoda K. 2005. Immunoisolaton of the yeast Golgi subcompartments and characterization of a novel membrane protein, Svp26, discovered in the Sed5-containing compartments. Mol Cell Biol 25: 7696-7710.
***Singh K, Kang PJ, Park HO. 2008. The Rho5 GTPase is necessary for oxidant-induced cell death in budding yeast. Proc Natl Acad Sci U S A 105: 1522-1527.
