# Supplementary material for: Global analysis of protein homomerization in Saccharomyces cerevisiae
Source: HighWire-hosted journal article supplement (doi:10.1101/gr.231860.117), 2018-12-19
Supplement: Supplemental_Tables.zip [file Supplemental_Table_S6.xlsx]

## Sheet: Sheet1
Supplemental Table S6. Comparison with positive reference set. Randomly organized positive reference set consisting of 83 known homomers was compared with homomer candidates identified in this study.
Gene	ORF	Reference reporting its homomerization	Assay used in the reference	Overlap with our data set	Subcellular localization*
CDC16	YKL022C	Lamb JR, et al. (1994)	Two-hybrid
CDC48	YDL126C	Decottignies A, et al. (2004)	Two-hybrid
RED1	YLR263W	Hollingsworth NM and Ponte L (1997)	Two-hybrid
SLK19	YOR195W	Newman JR, et al. (2000)	Two-hybrid
YPP1	YGR198W	Baird D, et al. (2008)	Affinity Capture-Western
TAF5	YBR198C	Natarajan K, et al. (1998)	Affinity Capture-Western
RAD53	YPL153C	Lee SJ, et al. (2003)	Biochemical Activity
BUD27	YFL023W	Tronnersjö S, et al. (2007)	Two-hybrid
MSS4	YDR208W	Ling Y, et al. (2012)	Affinity Capture-Western
PRP43	YGL120C	Tarassov K, et al. (2008)	PCA
CDC4	YFL009W	Dixon C, et al. (2003)	Two-hybrid
STB5	YHR178W	Akache B, et al. (2004)	Affinity Capture-Western
HOT1	YMR172W	Gomar-Alba M, et al. (2013)	Affinity Capture-Western
GLN3	YER040W	Alberti S, et al. (2009)	Reconstituted Complex
SSK1	YLR006C	Horie T, et al. (2008)	Affinity Capture-Western
NFI1	YOR156C	Mullen JR, et al. (2010)	Biochemical Activity
PBP1	YGR178C	Mangus DA, et al. (2004)	Two-hybrid
YOL057W	YOL057W	Baral PK, et al. (2008)	Co-purification
STE11	YLR362W	Printen JA and Sprague GF (1994)	Two-hybrid
KAR3	YPR141C	Chu HM, et al. (2005)	Reconstituted Complex
TUP1	YCR084C	Jabet C, et al. (2000)	Reconstituted Complex
DEF1	YKL054C	Tarassov K, et al. (2008)	PCA
UTP8	YGR128C	Krogan NJ, et al. (2004)	Affinity Capture-MS	O	nucleolus
APL4	YPR029C	Tarassov K, et al. (2008)	PCA	O	Golgi, vaculolar membranea
TCO89	YPL180W	Hruby A, et al. (2011)	PCA
COG6	YNL041C	Babu M, et al. (2012)	Affinity Capture-MS
NIP1	YMR309C	Krogan NJ, et al. (2004)	Affinity Capture-MS
TRZ1	YKR079C	Krogan NJ, et al. (2004)	Affinity Capture-MS
UTP13	YLR222C	Krogan NJ, et al. (2004)	Affinity Capture-MS
AMD1	YML035C	Tarassov K, et al. (2008)	PCA
YAK1	YJL141C	Lee P, et al. (2011)	Biochemical Activity
UBP10	YNL186W	Tarassov K, et al. (2008)	PCA
ACO2	YJL200C	Babu M, et al. (2012)	Affinity Capture-MS	O	mitochondrion
ACO1	YLR304C	Babu M, et al. (2012)	Affinity Capture-MS
HCA4	YJL033W	Krogan NJ, et al. (2004)	Affinity Capture-MS
SEY1	YOR165W	Tarassov K, et al. (2008)	PCA	O	ERb
OCT1	YKL134C	Babu M, et al. (2012)	Affinity Capture-MS
CEX1	YOR112W	Krogan NJ, et al. (2004)	Affinity Capture-MS
MAD1	YGL086W	Newman JR, et al. (2000)	Two-hybrid
RQC1	YDR333C	Defenouillère Q, et al. (2017)	Affinity Capture-MS
RGD2	YFL047W	Tarassov K, et al. (2008)	PCA	O	bud neck, cell periphery, cytoplasm
GCD6	YDR211W	Krogan NJ, et al. (2004)	Affinity Capture-MS	O	cytoplasm
DRS1	YLL008W	McCann KL, et al. (2015)	Two-hybrid
DBP7	YKR024C	Krogan NJ, et al. (2004)	Affinity Capture-MS
MES1	YGR264C	Krogan NJ, et al. (2004)	Affinity Capture-MS
TGL5	YOR081C	Tarassov K, et al. (2008)	PCA
TFG1	YGR186W	Krogan NJ, et al. (2004)	Affinity Capture-MS
YKR018C	YKR018C	Babu M, et al. (2012)	Affinity Capture-MS
RRP6	YOR001W	Gonzales-Zubiate FA, et al. (2017)	Affinity Capture-MS
NOC2	YOR206W	McCann KL, et al. (2015)	Two-hybrid
GID7	YCL039W	Tarassov K, et al. (2008)	PCA
SEC7	YDR170C	Mariño-Ramírez L and Hu JC (2002)	Protein-peptide
USO1	YDL058W	Yamakawa H, et al. (1996)	Reconstituted Complex
CDC25	YLR310C	Chen RA, et al. (2000)	Two-hybrid
YCF1	YDR135C	Wei W, et al. (2014)	Affinity Capture-Western
NUP159	YIL115C	Gaik M, et al. (2015)	Reconstituted Complex
SEC3	YER008C	Baek K, et al. (2010)	Co-crystal Structure	O	bud, cell periphery, bud neck
PDR5	YOR153W	Subba Rao G, et al. (2002)	Two-hybrid
SCP160	YJL080C	Babu M, et al. (2012)	Affinity Capture-MS
ATG9	YDL149W	Legakis JE, et al. (2007)	Two-hybrid
SLA2	YNL243W	Wesp A, et al. (1997)	Two-hybrid
CWH43	YCR017C	Umemura M, et al. (2007)	Affinity Capture-Western
IMH1	YLR309C	Tsukada M, et al. (1999)	Two-hybrid
RPN1	YHR027C	Krogan NJ, et al. (2004)	Affinity Capture-MS
NSP1	YJL041W	Alberti S, et al. (2009)	Reconstituted Complex
SCD5	YOR329C	Alberti S, et al. (2009)	Reconstituted Complex
VPH1	YOR270C	Kóta Z, et al. (2008)	Protein-peptide
SEC6	YIL068C	Sivaram MV, et al. (2005)	Co-purification
SEC10	YLR166C	TerBush DR, et al. (1996)	Affinity Capture-MS
ALR1	YOL130W	Wachek M, et al. (2006)	PCA
PEP1	YBL017C	Krogan NJ, et al. (2004)	Affinity Capture-MS
VPS15	YBR097W	Graef M, et al. (2013)	Affinity Capture-MS
PIM1	YBL022C	Babu M, et al. (2012)	Affinity Capture-MS	O	mitochondrion
MNR2	YKL064W	Babu M, et al. (2012)	Affinity Capture-MS
SFB3	YHR098C	Tarassov K, et al. (2008)	PCA
VPS34	YLR240W	Graef M, et al. (2013)	Affinity Capture-MS
VTC2	YFL004W	Babu M, et al. (2012)	Affinity Capture-MS
APL6	YGR261C	Schlecht U, et al. (2012)	PCA	O	Golgi, early Golgi
PMR1	YGL167C	Babu M, et al. (2012)	Affinity Capture-MS
VPS54	YDR027C	Babu M, et al. (2012)	Affinity Capture-MS
PEX6	YNL329C	Babu M, et al. (2012)	Affinity Capture-MS	O	peroxisome
SYG1	YIL047C	Schlecht U, et al. (2012)	PCA
COG3	YER157W	Schlecht U, et al. (2012)	PCA
*Huh WK, Falvo JV, Gerke LC, Carroll AS, Howson RW, Weissman JS, O'Shea EK. 2003. Global analysis of protein localization in budding yeast. Nature 425: 686-691.														aHuh WK, Falvo JV, Gerke LC, Carroll AS, Howson RW, Weissman JS, O'Shea EK. 2003. Global analysis of protein localization in budding yeast. Nature 425: 686-691.	aHuh WK, Falvo JV, Gerke LC, Carroll AS, Howson RW, Weissman JS, O'Shea EK. 2003. Global analysis of protein localization in budding yeast. Nature 425: 686-691.	aHuh WK, Falvo JV, Gerke LC, Carroll AS, Howson RW, Weissman JS, O'Shea EK. 2003. Global analysis of protein localization in budding yeast. Nature 425: 686-691.	aHuh WK, Falvo JV, Gerke LC, Carroll AS, Howson RW, Weissman JS, O'Shea EK. 2003. Global analysis of protein localization in budding yeast. Nature 425: 686-691.	aHuh WK, Falvo JV, Gerke LC, Carroll AS, Howson RW, Weissman JS, O'Shea EK. 2003. Global analysis of protein localization in budding yeast. Nature 425: 686-691.	aHuh WK, Falvo JV, Gerke LC, Carroll AS, Howson RW, Weissman JS, O'Shea EK. 2003. Global analysis of protein localization in budding yeast. Nature 425: 686-691.	aHuh WK, Falvo JV, Gerke LC, Carroll AS, Howson RW, Weissman JS, O'Shea EK. 2003. Global analysis of protein localization in budding yeast. Nature 425: 686-691.	aHuh WK, Falvo JV, Gerke LC, Carroll AS, Howson RW, Weissman JS, O'Shea EK. 2003. Global analysis of protein localization in budding yeast. Nature 425: 686-691.	aHuh WK, Falvo JV, Gerke LC, Carroll AS, Howson RW, Weissman JS, O'Shea EK. 2003. Global analysis of protein localization in budding yeast. Nature 425: 686-691.	aHuh WK, Falvo JV, Gerke LC, Carroll AS, Howson RW, Weissman JS, O'Shea EK. 2003. Global analysis of protein localization in budding yeast. Nature 425: 686-691.	aHuh WK, Falvo JV, Gerke LC, Carroll AS, Howson RW, Weissman JS, O'Shea EK. 2003. Global analysis of protein localization in budding yeast. Nature 425: 686-691.	aHuh WK, Falvo JV, Gerke LC, Carroll AS, Howson RW, Weissman JS, O'Shea EK. 2003. Global analysis of protein localization in budding yeast. Nature 425: 686-691.	aHuh WK, Falvo JV, Gerke LC, Carroll AS, Howson RW, Weissman JS, O'Shea EK. 2003. Global analysis of protein localization in budding yeast. Nature 425: 686-691.	aHuh WK, Falvo JV, Gerke LC, Carroll AS, Howson RW, Weissman JS, O'Shea EK. 2003. Global analysis of protein localization in budding yeast. Nature 425: 686-691.	aHuh WK, Falvo JV, Gerke LC, Carroll AS, Howson RW, Weissman JS, O'Shea EK. 2003. Global analysis of protein localization in budding yeast. Nature 425: 686-691.	aHuh WK, Falvo JV, Gerke LC, Carroll AS, Howson RW, Weissman JS, O'Shea EK. 2003. Global analysis of protein localization in budding yeast. Nature 425: 686-691.	aHuh WK, Falvo JV, Gerke LC, Carroll AS, Howson RW, Weissman JS, O'Shea EK. 2003. Global analysis of protein localization in budding yeast. Nature 425: 686-691.	aHuh WK, Falvo JV, Gerke LC, Carroll AS, Howson RW, Weissman JS, O'Shea EK. 2003. Global analysis of protein localization in budding yeast. Nature 425: 686-691.	aHuh WK, Falvo JV, Gerke LC, Carroll AS, Howson RW, Weissman JS, O'Shea EK. 2003. Global analysis of protein localization in budding yeast. Nature 425: 686-691.	aHuh WK, Falvo JV, Gerke LC, Carroll AS, Howson RW, Weissman JS, O'Shea EK. 2003. Global analysis of protein localization in budding yeast. Nature 425: 686-691.	aHuh WK, Falvo JV, Gerke LC, Carroll AS, Howson RW, Weissman JS, O'Shea EK. 2003. Global analysis of protein localization in budding yeast. Nature 425: 686-691.	aHuh WK, Falvo JV, Gerke LC, Carroll AS, Howson RW, Weissman JS, O'Shea EK. 2003. Global analysis of protein localization in budding yeast. Nature 425: 686-691.	aHuh WK, Falvo JV, Gerke LC, Carroll AS, Howson RW, Weissman JS, O'Shea EK. 2003. Global analysis of protein localization in budding yeast. Nature 425: 686-691.	aHuh WK, Falvo JV, Gerke LC, Carroll AS, Howson RW, Weissman JS, O'Shea EK. 2003. Global analysis of protein localization in budding yeast. Nature 425: 686-691.	aHuh WK, Falvo JV, Gerke LC, Carroll AS, Howson RW, Weissman JS, O'Shea EK. 2003. Global analysis of protein localization in budding yeast. Nature 425: 686-691.	aHuh WK, Falvo JV, Gerke LC, Carroll AS, Howson RW, Weissman JS, O'Shea EK. 2003. Global analysis of protein localization in budding yeast. Nature 425: 686-691.	aHuh WK, Falvo JV, Gerke LC, Carroll AS, Howson RW, Weissman JS, O'Shea EK. 2003. Global analysis of protein localization in budding yeast. Nature 425: 686-691.	aHuh WK, Falvo JV, Gerke LC, Carroll AS, Howson RW, Weissman JS, O'Shea EK. 2003. Global analysis of protein localization in budding yeast. Nature 425: 686-691.	aHuh WK, Falvo JV, Gerke LC, Carroll AS, Howson RW, Weissman JS, O'Shea EK. 2003. Global analysis of protein localization in budding yeast. Nature 425: 686-691.	aHuh WK, Falvo JV, Gerke LC, Carroll AS, Howson RW, Weissman JS, O'Shea EK. 2003. Global analysis of protein localization in budding yeast. Nature 425: 686-691.	aHuh WK, Falvo JV, Gerke LC, Carroll AS, Howson RW, Weissman JS, O'Shea EK. 2003. Global analysis of protein localization in budding yeast. Nature 425: 686-691.	aHuh WK, Falvo JV, Gerke LC, Carroll AS, Howson RW, Weissman JS, O'Shea EK. 2003. Global analysis of protein localization in budding yeast. Nature 425: 686-691.	aHuh WK, Falvo JV, Gerke LC, Carroll AS, Howson RW, Weissman JS, O'Shea EK. 2003. Global analysis of protein localization in budding yeast. Nature 425: 686-691.	aHuh WK, Falvo JV, Gerke LC, Carroll AS, Howson RW, Weissman JS, O'Shea EK. 2003. Global analysis of protein localization in budding yeast. Nature 425: 686-691.	aHuh WK, Falvo JV, Gerke LC, Carroll AS, Howson RW, Weissman JS, O'Shea EK. 2003. Global analysis of protein localization in budding yeast. Nature 425: 686-691.	aHuh WK, Falvo JV, Gerke LC, Carroll AS, Howson RW, Weissman JS, O'Shea EK. 2003. Global analysis of protein localization in budding yeast. Nature 425: 686-691.
aPhelan JP, Millson SH, Parker PJ, Piper PW, Cooke FT. 2006. Fab1p and AP-1 are required for trafficking of endogenously ubiquitylated cargoes to the vacuole lumen in S. cerevisiae. J Cell Sci 119: 4225-4234.
bHu J, Shibata Y, Zhu PP, Voss C, Rismanchi N, Prinz WA, Rapoport TA, Blackstone C. 2009. A class of dynamin-like GTPases involved in the generation of the tubular ER network. Cell 138: 549-561.
[truncated: 5,000 more columns]
