# Supplementary material for: Global analysis of protein homomerization in Saccharomyces cerevisiae
Source: HighWire-hosted journal article supplement (doi:10.1101/gr.231860.117), 2018-12-19
Supplement: Supplemental_Tables.zip [file Supplemental_Table_S7.xlsx]

## Sheet: Sheet1
Supplemental Table S7. Comparison with negative reference set. Randomly organized negative reference set consisting of 134 proteins, of which homomerization has not been reported before, was compared with homomer candidates identified in this study.
Gene	ORF	BiFC detection	Subcellular localization*		Gene	ORF	BiFC detection	Subcellular localization*
RTT101	YJL047C				CTF3	YLR381W
NOT3	YIL038C				YOR019W	YOR019W
TRL1	YJL087C				UTP25	YIL091C
IRC8	YJL051W				PPZ2	YDR436W
FYV8	YGR196C				SET3	YKR029C
IOC2	YLR095C				POX1	YGL205W
VPS72	YDR485C				BUD7	YOR299W
UBP14	YBR058C				YNL144C	YNL144C
CLA4	YNL298W				DHR2	YKL078W
SAS3	YBL052C				AGA1	YNR044W
PRK1	YIL095W				KIN82	YCR091W
PPS1	YBR276C	O	unknown		YDR109C	YDR109C
SWI6	YLR182W				YJL132W	YJL132W
EFT1	YOR133W				SLX4	YLR135W
YMR102C	YMR102C				SKG6	YHR149C
PAM1	YDR251W				FCP1	YMR277W
HSP78	YDR258C				BRN1	YBL097W
FLC3	YGL139W				NUP2	YLR335W
VPS16	YPL045W	O	vacuolar membrane		DOA1	YKL213C
RPH1	YER169W				SWI5	YDR146C
YRM1	YOR172W				IRA1	YBR140C
TOF2	YKR010C				TRK1	YJL129C
MET6	YER091C				TCB2	YNL087W
YJL206C	YJL206C				KIN2	YLR096W
ELG1	YOR144C				ENA2	YDR039C
YOL036W	YOL036W				SEC8	YPR055W
TUL1	YKL034W				IRA2	YOL081W
UBP9	YER098W				YRF1-3	YGR296W
MNL1	YHR204W				NUP192	YJL039C
SOG2	YOR353C				VPS8	YAL002W
TSR1	YDL060W				ENA1	YDR040C
YGR237C	YGR237C				KIN1	YDR122W
SDA1	YGR245C				CCC2	YDR270W
EGH1	YIR007W				ROT2	YBR229C
MSS11	YMR164C				STE13	YOR219C
RAD4	YER162C				ZDS1	YMR273C
RAD16	YBR114W				PHO91	YNR013C
ELP2	YGR200C				SFB2	YNL049C
GYM1	YHR182W				SPO75	YLL005C
LEU1	YGL009C				SSY1	YDR160W
SQS1	YNL224C				LAS21	YJL062W
DPB11	YJL090C				PMT1	YDL095W
GIP4	YAL031C				MET10	YFR030W	O	cytoplasm
SPT21	YMR179W				SUL2	YLR092W
DSL1	YNL258C				SBE2	YDR351W
GCN20	YFR009W				SBE22	YHR103W
SKI7	YOR076C				KEX2	YNL238W
SUV3	YPL029W				SRO7	YPR032W
MAK10	YEL053C				PET309	YLR067C
ABF1	YKL112W				RSN1	YMR266W
RIM13	YMR154C				SEC15	YGL233W
FRA1	YLL029W				STV1	YMR054W
GYP7	YDL234C				KHA1	YJL094C
DSF2	YBR007C				YME2	YMR302C
ROG3	YFR022W				KAP120	YPL125W
APL2	YKL135C	O	late Golgi		CHS2	YBR038W
GFA1	YKL104C				PHO87	YCR037C
NTH1	YDR001C				VNX1	YNL321W
AKR2	YOR034C				SUL1	YBR294W
CHS6	YJL099W				YTA12	YMR089C
SKY1	YMR216C				PHM7	YOL084W
SET2	YJL168C	O	nucleus		GPR1	YDL035C
YLR149C	YLR149C				PMA2	YPL036W
UBP11	YKR098C				EDS1	YBR033W
ESC8	YOL017W				TRK2	YKR050W
DIA2	YOR080W				NIC96	YFR002W
CTF18	YMR078C				AXL2	YIL140W
*Huh WK, Falvo JV, Gerke LC, Carroll AS, Howson RW, Weissman JS, O'Shea EK. 2003. Global analysis of protein localization in budding yeast. Nature 425: 686-691.
