# Supplementary material for: Global analysis of protein homomerization in Saccharomyces cerevisiae
Source: HighWire-hosted journal article supplement (doi:10.1101/gr.231860.117), 2018-12-19
Supplement: Supplemental_Tables.zip [file Supplemental_Table_S8.xlsx]

## Sheet: Sheet1
Supplemental Table S8. Homomerization of yeast adaptin proteins.
Gene	ORF	Reported as homomer	Reference	BiFC detection
APL1	YJR005W
APL2	YKL135C			O
APL3	YBL037W	O	Babu et al. (2012)
APL4	YPR029C	O	Schlecht et al. (2012)	O
APL5	YPL195W			O
APL6	YGR261C	O	Schlecht et al. (2012)	O
