# Supplementary material for: Global analysis of protein homomerization in Saccharomyces cerevisiae
Source: HighWire-hosted journal article supplement (doi:10.1101/gr.231860.117), 2018-12-19
Supplement: Supplemental_Tables.zip [file Supplemental_Table_S9.xlsx]

## Sheet: Sheet1
Supplemental Table S9. Homomerization of yeast p24 family proteins.
Gene	ORF	Reported as homomer	Reference	BiFC detection
EMP24	YGL200C	O	Miller et al. (2005)	O
ERP1	YAR002C-A	O	Tarassov et al. (2008)	O
ERP2	YAL007C
ERP3	YDL018C	O	Babu et al. (2012)
ERP4	YOR016C
ERP5	YHR110W	O	Miller et al. (2005)
ERP6	YGL002W
ERV25	YML012W	O	Tarassov et al. (2008)	O
