# Supplementary material for: Global analysis of protein homomerization in Saccharomyces cerevisiae
Source: HighWire-hosted journal article supplement (doi:10.1101/gr.231860.117), 2018-12-19
Supplement: Supplemental_Tables.zip [file Supplemental_Table_S10.xlsx]

## Sheet: Sheet1
Supplemental Table S10. GO analysis of protein homomers. GO biological process categories including protein homomers identified in this study are listed with hypergeometric P-values. Significantly enriched categories (P < 0.05) are presented in bold.
Biological process	GO IP	Gene ontology category description	Frequency in homomer population (total 186)	P-value
transport	48193	Golgi vesicle transport	16	0.000116665
	51169	nuclear transport	11	0.0154681
	6811	ion transport	11	0.13921
	55085	transmembrane transport	10	0.139479
	16197	endosomal transport	8	0.00908639
	6869	lipid transport	4	0.133089
	8643	carbohydrate transport	1	0.621167
	15931	nucleobase-containing compound transport	10	0.00822517
	6897	endocytosis	10	0.000454607
	6605	protein targeting	13	0.106866
	6887	exocytosis	6	0.00267975
cellular component organization or biogenesis	70271	protein complex biogenesis	17	0.00461023
	7005	mitochondrion organization	16	0.00404932
	7010	cytoskeleton organization	15	0.00358111
	48308	organelle inheritance	11	8.75213e-07
	7033	vacuole organization	7	0.0133418
	7031	peroxisome organization	6	0.00297344
	71554	cell wall organization or biogenesis	5	0.487193
	70925	organelle assembly	4	0.551952
	16050	vesicle organization	5	0.0845152
	42274	ribosomal small subunit biogenesis	6	0.195624
	42273	ribosomal large subunit biogenesis	6	0.080008
	48284	organelle fusion	5	0.114476
	61025	membrane fusion	6	0.0221124
metabolic process	6520	cellular amino acid metabolic process	13	0.00486728
	55086	nucleobase-containing small molecule metabolic process	11	0.0280105
	6629	lipid metabolic process	10	0.352254
	51186	cofactor metabolic process	6	0.261533
	32787	monocarboxylic acid metabolic process	8	0.0494164
	6091	generation of precursor metabolites and energy	9	0.0339607
RNA metabolism	6364	rRNA processing	12	0.18838
	6401	RNA catabolic process	6	0.182404
	43144	snoRNA processing	2	0.375466
	6360	transcription from RNA polymerase I promoter	2	0.590037
	6354	DNA-templated transcription, elongation	5	0.148817
	6352	DNA-templated transcription, initiation	3	0.3538
	6353	DNA-templated transcription, termination	2	0.354484
response to stimulus	6970	response to osmotic stress	5	0.126868
	42594	response to starvation	4	0.0777646
	9408	response to heat	4	0.159868
DNA metabolic process	6310	DNA recombination	3	0.211122
	6260	DNA replication	4	0.62512
translation	6417	regulation of translation	5	0.186966
	6413	translational initiation	4	0.0991422
protein modification process	31399	regulation of protein modification process	5	0.217668
	18193	peptidyl-amino acid modification	5	0.444078
	16570	histone modification	4	0.420292
	43543	protein acylation	3	0.297957
	6457	protein folding	5	0.13985
cell cycle	51726	regulation of cell cycle	11	0.0741327
	910	cytokinesis	5	0.0952073
single-organism cellular process	7114	cell budding	4	0.0860112
	902	cell morphogenesis	1	0.573752
	45333	cellular respiration	7	0.00983854
	23052	signaling	9	0.277615
