# Supplementary material for: Global analysis of protein homomerization in Saccharomyces cerevisiae
Source: HighWire-hosted journal article supplement (doi:10.1101/gr.231860.117), 2018-12-19
Supplement: Supplemental_Tables.zip [file Supplemental_Table_S11.xlsx]

## Sheet: Sheet1
Supplemental Table S11. Protein homomers showing changes in the BiFC signal intensity upon N starvation.
Gene	Signal change	BiFC intensity				P-value	GFP intensity				P-value	BiFC intensity
		Normal condition		N starvation			Normal condition		N starvation			N replenishment
		Mean	SD	Mean	SD		Mean	SD	Mean	SD		Mean	SD
AAT2	signal increased	1027526	284376	3267393	694128	3.7396e-30	NAa	NA	NA	NA	NA	1.10855e+06	439961
ACO2	signal increased	1793338	552359	3695635	925076	1.51057e-31	645174	189211	626574	171313	NSb	1.79226e+06	512603
AIM17	signal increased	631011	206713	2240128	542831	9.92144e-33	499457	127909	607727	111235	3.34203e-29	687626	301165
AIP1	signal increased	630661	215981	2564543	679329	1.64682e-24	718575	153048	701529	152945	NS	634219	240076
ATG8	signal increased	336084	186983	1334661	487203	1.17856e-22	NA	NA	NA	NA	NS	375859	126767
DID2	signal increased	897249	291359	2172651	572455	3.51593e-33	505961	86215.7	507292	102930	NS	879400	296147
ERP1	signal increased	1317516	346521	2727993	533566	1.05831e-41	740583	174622	746194	200849	NS	1.35016e+06	253736
GLK1	signal increased	1894332	948904	4841434	1772968	3.90326e-28	730495	295006	708647	313826	NS	2.02301e+06	1.55649e+06
IVY1	signal increased	1022127	279742	1945671	494838	4.23879e-32	462220	94458.9	464526	121968	NS	1.02262e+06	288151
LSM1	signal increased	683210	246316	1.53943e+06	345669	1.05502e-28	562840	96880.2	557797	112278	NS	778739	363016
MAP1	signal increased	582213	322730	2.2222e+06	487910	2.17712e-38	707016	163922	708851	177854	NS	705521	291795
MEH1	signal increased	742044	332086	1.71539e+06	312549	4.43808e-37	543662	113733	548660	124754	NS	705521	291795
MET14	signal increased	671142	317533	2.2127e+06	732883	2.50858e-30	396236	102627	565903	110659	4.13882e-49	664887	285105
NAB2	signal increased	1.98349e+06	651200	3.54904e+06	1.01228e+06	2.95415e-26	755636	192387	745787	184451	NS	1.92291e+06	586407
PLN1	signal increased	1.96839e+06	474356	3.72497e+06	1.05753e+06	3.09247e-21	388906	97995.6	381218	107236	NS	1.8753e+06	379521
POM33	signal increased	740012	283586	1.83333e+06	399176	5.24651e-47	777560	145280	763322	164933	NS	719698	216705
PSE1	signal increased	1.36622e+06	422360	1.99089e+06	380247	1.11984e-15	825006	163233	823485	171620	NS	1.21496e+06	238441
RDL1	signal increased	718186	303336	3.50342e+06	936027	4.98813e-34	678822	192957	832256	234369	4.57758e-26	715492	291184
RVS167	signal increased	1.2687e+06	305230	1.81451e+06	338791	7.61435e-42	450061	130037	648876	109004	5.22893e-39	1.24708e+06	270435
SLM4	signal increased	865243	394250	1.76345e+06	453708	3.43497e-54	619949	125573	621270	139854	NS	801722	196772
YAR044W	signal increased	502587	238508	1.59537e+06	348880	4.70233e-49	599213	155071	597198	170936	NS	506470	209050
AIM24	signal decreased	2.53746e+06	518699	701905	284351	1.57035e-45	575363	120935	576080	140805	NS	2.4692e+06	274083
ALB1	signal decreased	1.29315e+06	571085	815717	213194	7.92916e-11	673414	153601	675090	139643	NS	1.26744e+06	203627
APL2	signal decreased	1.65426e+06	443263	514540	198854	7.95002e-33	799235	118744	231722	79186.7	1.29692e-56	1.5551e+06	289205
BCP1	signal decreased	1.29696e+06	297050	368464	257345	1.93919e-38	677596	142673	304528	80486.9	5.89085e-39	1.24204e+06	323254
CAF120	signal decreased	1.29428e+06	359856	450332	229948	3.86863e-40	699086	162955	233476	81373.7	2.58069e-38	1.26077e+06	196169
DCP2	signal decreased	2.0017e+06	598164	641186	243662	1.01451e-30	628672	149515	621444	132867	NS	1.87062e+06	217774
GLY1	signal decreased	8.15515e+06	2.66804e+06	3.54208e+06	2.05411e+06	1.03627e-30	2.96364e+06	591944	2.00652e+06	380446	6.7859e-33	8.25692e+06	1.98372e+06
KGD1	signal decreased	2.58108e+06	880616	1.26121e+06	450903	9.78149e-22	1.16941e+06	315979	1.14468e+06	374498	NS	2.35348e+06	392357
MDH2	signal decreased	1.00345e+06	376448	722164	256512	2.84682e-18	1.20036e+06	261792	458286	113133	4.55315e-36	1.03821e+06	298835
MDJ1	signal decreased	1.05802e+06	343087	648683	304163	1.0622e-42	817354	141557	785585	191013	NS	1.03953e+06	222982
MYO2	signal decreased	2.20704e+06	628357	689573	255867	2.07679e-32	612945	153564	300787	77482	1.34037e-31	2.36403e+06	205985
MYO4	signal decreased	1.40935e+06	357217	559248	256104	1.91444e-43	491736	113805	297733	77599.9	1.62017e-31	1.37979e+06	296395
RAI1	signal decreased	1.66697e+06	311378	658950	335540	1.27331e-41	658133	139239	649702	131837	NS	1.65278e+06	262618
YLL067C	signal decreased	1.26312e+06	343697	558140	264092	2.35259e-42	NA	NA	NA	NA	NS	1.25748e+06	320724
ZPR1	signal decreased	1.32606e+06	332876	458635	235708	4.40009e-46	957186	204334	939027	134037	NS	1.36363e+06	262645
aNA: not available
bNS: not significant
