# Supplementary material for: Global analysis of protein homomerization in Saccharomyces cerevisiae
Source: HighWire-hosted journal article supplement (doi:10.1101/gr.231860.117), 2018-12-19
Supplement: Supplemental_Tables.zip [file Supplemental_Table_S12.xlsx]

## Sheet: Sheet1
Supplemental Table S12. Protein homomers showing changes in the BiFC signal localization upon N starvation.
Gene	Subcellular localization of the BiFC signal		Subcellular localization of the GFP signal
	Normal condition	N starvation	Normal condition	N starvation
ARC35	actin	punctate foci	actin	punctate foci
ATP19	mitochondrion	punctate foci	mitochondrion	punctate foci
ILV6	mitochondrion	punctate foci	mitochondrion	punctate foci
KAP123	nuclear membrane	punctate foci	cytoplasm, nucleus	cytoplasm
NOC3	nucleolus, nucleus	punctate foci	nucleolus, nucleus	punctate foci
NOP15	nucleolus, nucleus	punctate foci	nucleolus, nucleus	punctate foci
RAD51	cytoplasm, nucleus	nuclear foci	cytoplasm, nucleus	nuclear foci
RTN2	ER	plasma membrane	ER	plasma membrane
VPS16	vacuolar membrane	vacuole	vacuolar membrane	vacuole
VPS60	vacuolar membrane	vacuole	vacuolar membrane	vacuole
WTM1	nucleus	punctate foci	nucleus	punctate foci
YHR127W	nucleus	punctate foci	nucleus	punctate foci
