# Supplementary material for: Global analysis of protein homomerization in Saccharomyces cerevisiae
Source: HighWire-hosted journal article supplement (doi:10.1101/gr.231860.117), 2018-12-19
Supplement: Supplemental_Tables.zip [file Supplemental_Table_S13.xlsx]

## Sheet: Sheet1
Supplemental Table S13. Proteins analyzed for interaction with Pln1 by BiFC assay.
Gene	ORF	BiFC signal detected
Mitochondrial fission and fusiona
FZO1	YBR179C
UGO1	YDR470C
MGM1	YOR211C
FIS1	YIL065C
DNM1	YLL001W
MDV1	YJL112W
CAF4	YKR036C
Electron transport chainb
NDE1	YMR145C
NDE2	YDL085W
NDI1	YML120C
GUT2	YIL155C
SDH1	YKL148C
SDH2	YLL041C
SDH4	YDR178W
CYC1	YJR048W
CYC7	YEL039C
phosphoslipid metabolismc
CDS1	YBR029C
CHO1	YER026C
PSD1	YNL169C
OPI3	YJR073C
CKI1	YLR133W
CPT1	YNL130C
SLC1	YDL052C	Yes
LCB1	YMR296C
LDH1	YBR204C
ORM2	YLR350W
ORM1	YGR038W
FAS1	YKL182W	Yes
FAS2	YPL231W	Yes
INO1	YJL153C
Sterol synthesisd
ERG1	YGR175C
ERG7	YHR072W
ERG11	YHR007C
ERG24	YNL280C
ERG25	YGR060W
ERG26	YGL001C
ERG27	YLR100W
ERG6	YML008C
ERG2	YMR202W
ERG3	YLR056W
ERG5	YMR015C
ERG4	YGL012W
ARE1	YCR048W
ARE2	YNR019W
aTamura et al. 2011
bRosenfeld and Beauvoit 2003
cRaychaudhuri et al. 2012
dTiedje et al. 2007
