# Supplementary material for: Global analysis of protein homomerization in Saccharomyces cerevisiae
Source: HighWire-hosted journal article supplement (doi:10.1101/gr.231860.117), 2018-12-19
Supplement: Supplemental_Tables.zip [file Supplemental_Table_S14.xlsx]

## Sheet: strains
Supplementary Table S14. Yeast strains used in this study.
Strain	Genotype	Reference
BY4741	MATa his3D1 leu2D0 met15D0 ura3D0	Research Genetics
BY4742	MATa his3D1leu2D0 lys2D0 ura3D0	Research Genetics
TAP fusion strains	MATa his3D1 leu2D0 met15D0 ura3D0 GENE-TAP::His3MX6	Ghaemmaghami et al., 2003
VN fusion strains	MATa his3D1 leu2D0 met15D0 ura3D0 GENE-VN::KlURA3	Sung et al., 2013
VC fusion strains (MATa)	MATa his3D1 leu2D0 met15D0 ura3D0 GENE-VC::LEU2	This study (see Table S2)
VC fusion strains (MATa)	MATa his3D1 leu2D0 met15D0 ura3D0 GENE-VC::LEU2	This study (see Table S3)
HY1752	MATa his3D1 leu2D0 met15D0 ura3D0 pln1D::LEU2	This study
HY1753	MATa his3D1 leu2D0 met15D0 ura3D0 dga1D::LEU2	This study
HY1754	MATa his3D1 leu2D0 met15D0 ura3D0 rad50D::KanMX	Giaever et al., 2002
HY1755	MATa his3D1 leu2D0 met15D0 ura3D0 PLN1-GFP::His3MX6	Huh et al., 2003
HY1756	MATa his3D1 leu2D0 met15D0 ura3D0 FAS1-GFP::His3MX6	Huh et al., 2003
HY1757	MATa his3D1 leu2D0 met15D0 ura3D0 FAS2-GFP::His3MX6	Huh et al., 2003
HY1758	MATa his3D1 leu2D0 met15D0 ura3D0 SLC1-GFP::His3MX6	Huh et al., 2003
HY1759	MATa his3D1 leu2D0 lys2D0 ura3D0 pADH-PLN1-myc	This study
HY1760	MATa/a his3D1/his3D1 leu2D0/ leu2D0 met15D0/MET15 LYS2/lys2D0 ura3D0/ura3D0 FAS1-GFP::His3MX6 p416ADH-PLN1-myc	This study
HY1761	MATa/a his3D1/his3D1 leu2D0/ leu2D0 met15D0/MET15 LYS2/lys2D0 ura3D0/ura3D0 FAS2-GFP::His3MX6 p416ADH-PLN1-myc	This study
HY1762	MATa/a his3D1/his3D1 leu2D0/ leu2D0 met15D0/MET15 LYS2/lys2D0 ura3D0/ura3D0 SLC1-GFP::His3MX6 p416ADH-PLN1-myc	This study
HY1765	MATa/a his3D1/his3D1 leu2D0/ leu2D0 met15D0/met15D0 ura3D0/ura3D0 FAS1-GFP::His3MX6 FAS2-HA::KlURA3	This study
HY1115	MATa his3D1 leu2D0 met15D0 ura3D0 atg8D::KanMX KlURA3::PATG8-GFP-ATG8	Shin et al., 2011
HY1766	MATa his3D1 leu2D0 met15D0 ura3D0 POT1-TAP::His3MX6	This study
HY1769	MATa his3D1 leu2D0 met15D0 ura3D0 atg8D::KanMX KlURA3::PATG8-GFP-ATG8 pln1D::LEU2	This study
HY1770	MATa his3D1 leu2D0 met15D0 ura3D0 POT1-TAP::His3MX6 pln1D::LEU2	This study
HY1772	MATa his3D1 leu2D0 met15D0 ura3D0 PLN1-VN::KlURA3	Sung et al., 2013
HY1773	MATa his3D1 leu2D0 met15D0 ura3D0 PLN1-VC::LEU2	This study
HY1774	MATa his3D1 leu2D0 met15D0 ura3D0 FAS1-VC::LEU2	This study
HY1775	MATa his3D1 leu2D0 met15D0 ura3D0 FAS2-VC::LEU2	This study
HY1776	MATa his3D1 leu2D0 met15D0 ura3D0 SLC1-VC::LEU2	This study
HY1777	MATa his3D1 leu2D0 met15D0 ura3D0 His3MX6::PRPL7B-VN-RAD52	This study
HY1778	MATa his3D1 leu2D0 lys2D0 ura3D0 His3MX6::PRPL7B-VC-RAD52	This study
HY1779	MATa his3D1 leu2D0 met15D0 ura3D0 RAD52-VN::KlURA3	Sung et al., 2013
HY1780	MATa his3D1 leu2D0 met15D0 ura3D0 RAD52-VC::LEU2	This study
HY1781	MATa his3D1 leu2D0 met15D0 ura3D0 p413ADH-GFP	This study
HY1782	MATa his3D1 leu2D0 met15D0 ura3D0 p416ADH-VN	This study
HY1875	MATa his3D1 leu2D0 met15D0 ura3D0 His3MX6::PCET1-LZ-PLN1	This study
HY1876	MATa his3D1 leu2D0 met15D0 ura3D0 KlURA3::PCET1-LZ-PLN1-GFP::His3MX6	This study
HY1877	MATa his3D1 leu2D0 met15D0 ura3D0 His3MX6::PCET1-LZ-PLN1-VN::KlURA3	This study
HY1878	MATa his3D1 leu2D0 met15D0 ura3D0 His3MX6::PCET1-LZ-PLN1-VC::LEU2	This study
HY1879	MATa his3D1 leu2D0 lys2D0 ura3D0 HSP104-RFP::His3MX6	This study
YS001	MATa his3D1 leu2D0 met15D0 ura3D0 MYO2-HA::KlURA3	This study
YS002	MATa his3D1 leu2D0 met15D0 ura3D0 XRN1-HA::KlURA3	This study
YS003	MATa his3D1 leu2D0 met15D0 ura3D0 GLT1-HA::KlURA3	This study
YS004	MATa his3D1 leu2D0 met15D0 ura3D0 MYO4-HA::KlURA3	This study
YS005	MATa his3D1 leu2D0 met15D0 ura3D0 ROM2-HA::KlURA3	This study
YS006	MATa his3D1 leu2D0 met15D0 ura3D0 GEA1-HA::KlURA3	This study
YS007	MATa his3D1 leu2D0 met15D0 ura3D0 EDE1-HA::KlURA3	This study
YS008	MATa his3D1 leu2D0 met15D0 ura3D0 KAP123-HA::KlURA3	This study
YS009	MATa his3D1 leu2D0 met15D0 ura3D0 GDH2-HA::KlURA3	This study
YS010	MATa his3D1 leu2D0 met15D0 ura3D0 MYO5-HA::KlURA3	This study
YS011	MATa his3D1 leu2D0 met15D0 ura3D0 GIN4-HA::KlURA3	This study
YS012	MATa his3D1 leu2D0 met15D0 ura3D0 INP53-HA::KlURA3	This study
YS013	MATa his3D1 leu2D0 met15D0 ura3D0 PSE1-HA::KlURA3	This study
YS014	MATa his3D1 leu2D0 met15D0 ura3D0 GCV2-HA::KlURA3	This study
YS015	MATa his3D1 leu2D0 met15D0 ura3D0 YPR097W-HA::KlURA3	This study
YS016	MATa his3D1 leu2D0 met15D0 ura3D0 KGD1-HA::KlURA3	This study
YS017	MATa his3D1 leu2D0 met15D0 ura3D0 CAF120-HA::KlURA3	This study
YS018	MATa his3D1 leu2D0 met15D0 ura3D0 VPS35-HA::KlURA3	This study
YS019	MATa his3D1 leu2D0 met15D0 ura3D0 DCP2-HA::KlURA3	This study
YS020	MATa his3D1 leu2D0 met15D0 ura3D0 YAR044W-HA::KlURA3	This study
YS021	MATa his3D1 leu2D0 met15D0 ura3D0 APL4-HA::KlURA3	This study
YS022	MATa his3D1 leu2D0 met15D0 ura3D0 VPS16-HA::KlURA3	This study
YS023	MATa his3D1 leu2D0 met15D0 ura3D0 ACO2-HA::KlURA3	This study
YS024	MATa his3D1 leu2D0 met15D0 ura3D0 SEY1-HA::KlURA3	This study
YS025	MATa his3D1 leu2D0 met15D0 ura3D0 RGD2-HA::KlURA3	This study
YS026	MATa his3D1 leu2D0 met15D0 ura3D0 GCD6-HA::KlURA3	This study
YS027	MATa his3D1 leu2D0 met15D0 ura3D0 APL2-HA::KlURA3	This study
YS028	MATa his3D1 leu2D0 met15D0 ura3D0 YPR090W-HA::KlURA3	This study
YS029	MATa his3D1 leu2D0 met15D0 ura3D0 SET2-HA::KlURA3	This study
YS030	MATa his3D1 leu2D0 met15D0 ura3D0 ACS1-HA::KlURA3	This study
YS031	MATa his3D1 leu2D0 met15D0 ura3D0 UTP8-HA::KlURA3	This study
YS032	MATa his3D1 leu2D0 met15D0 ura3D0 FAA1-HA::KlURA3	This study
YS033	MATa his3D1 leu2D0 met15D0 ura3D0 YLR072W-HA::KlURA3	This study
YS034	MATa his3D1 leu2D0 met15D0 ura3D0 NCL1-HA::KlURA3	This study
YS035	MATa his3D1 leu2D0 met15D0 ura3D0 MSS116-HA::KlURA3	This study
YS036	MATa his3D1 leu2D0 met15D0 ura3D0 RGD1-HA::KlURA3	This study
YS037	MATa his3D1 leu2D0 met15D0 ura3D0 NOC3-HA::KlURA3	This study
YS038	MATa his3D1 leu2D0 met15D0 ura3D0 MSB3-HA::KlURA3	This study
YS039	MATa his3D1 leu2D0 met15D0 ura3D0 ABP140-HA::KlURA3	This study
YS040	MATa his3D1 leu2D0 met15D0 ura3D0 UTP5-HA::KlURA3	This study
YS041	MATa his3D1 leu2D0 met15D0 ura3D0 TGL3-HA::KlURA3	This study
YS042	MATa his3D1 leu2D0 met15D0 ura3D0 AIP1-HA::KlURA3	This study
YS043	MATa his3D1 leu2D0 met15D0 ura3D0 URA7-HA::KlURA3	This study
YS044	MATa his3D1 leu2D0 met15D0 ura3D0 GCD1-HA::KlURA3	This study
YS045	MATa his3D1 leu2D0 met15D0 ura3D0 ILV1-HA::KlURA3	This study
YS046	MATa his3D1 leu2D0 met15D0 ura3D0 RPL7A-HA::KlURA3	This study
YS047	MATa his3D1 leu2D0 met15D0 ura3D0 TRM1-HA::KlURA3	This study
YS048	MATa his3D1 leu2D0 met15D0 ura3D0 SRP1-HA::KlURA3	This study
YS049	MATa his3D1 leu2D0 met15D0 ura3D0 MCX1-HA::KlURA3	This study
YS050	MATa his3D1 leu2D0 met15D0 ura3D0 GCD11-HA::KlURA3	This study
YS051	MATa his3D1 leu2D0 met15D0 ura3D0 NAB2-HA::KlURA3	This study
YS052	MATa his3D1 leu2D0 met15D0 ura3D0 HOM3-HA::KlURA3	This study
YS053	MATa his3D1 leu2D0 met15D0 ura3D0 JIP5-HA::KlURA3	This study
YS054	MATa his3D1 leu2D0 met15D0 ura3D0 CYS4-HA::KlURA3	This study
YS055	MATa his3D1 leu2D0 met15D0 ura3D0 ALD6-HA::KlURA3	This study
YS056	MATa his3D1 leu2D0 met15D0 ura3D0 GLK1-HA::KlURA3	This study
YS057	MATa his3D1 leu2D0 met15D0 ura3D0 LPD1-HA::KlURA3	This study
YS058	MATa his3D1 leu2D0 met15D0 ura3D0 LSB3-HA::KlURA3	This study
YS059	MATa his3D1 leu2D0 met15D0 ura3D0 ZPR1-HA::KlURA3	This study
YS060	MATa his3D1 leu2D0 met15D0 ura3D0 RVS167-HA::KlURA3	This study
YS061	MATa his3D1 leu2D0 met15D0 ura3D0 SHM2-HA::KlURA3	This study
YS062	MATa his3D1 leu2D0 met15D0 ura3D0 AIM17-HA::KlURA3	This study
YS063	MATa his3D1 leu2D0 met15D0 ura3D0 UTR2-HA::KlURA3	This study
YS064	MATa his3D1 leu2D0 met15D0 ura3D0 IVY1-HA::KlURA3	This study
YS065	MATa his3D1 leu2D0 met15D0 ura3D0 KES1-HA::KlURA3	This study
YS066	MATa his3D1 leu2D0 met15D0 ura3D0 WTM1-HA::KlURA3	This study
YS067	MATa his3D1 leu2D0 met15D0 ura3D0 MDH2-HA::KlURA3	This study
YS068	MATa his3D1 leu2D0 met15D0 ura3D0 ENT5-HA::KlURA3	This study
YS069	MATa his3D1 leu2D0 met15D0 ura3D0 YMR010W-HA::KlURA3	This study
YS070	MATa his3D1 leu2D0 met15D0 ura3D0 RAD51-HA::KlURA3	This study
YS071	MATa his3D1 leu2D0 met15D0 ura3D0 RTN2-HA::KlURA3	This study
YS072	MATa his3D1 leu2D0 met15D0 ura3D0 AIM24-HA::KlURA3	This study
YS073	MATa his3D1 leu2D0 met15D0 ura3D0 YKL077W-HA::KlURA3	This study
YS074	MATa his3D1 leu2D0 met15D0 ura3D0 MAP1-HA::KlURA3	This study
YS075	MATa his3D1 leu2D0 met15D0 ura3D0 GLY1-HA::KlURA3	This study
YS076	MATa his3D1 leu2D0 met15D0 ura3D0 RAI1-HA::KlURA3	This study
YS077	MATa his3D1 leu2D0 met15D0 ura3D0 HSP42-HA::KlURA3	This study
YS078	MATa his3D1 leu2D0 met15D0 ura3D0 ARO4-HA::KlURA3	This study
YS079	MATa his3D1 leu2D0 met15D0 ura3D0 ARC35-HA::KlURA3	This study
YS080	MATa his3D1 leu2D0 met15D0 ura3D0 YER156C-HA::KlURA3	This study
YS081	MATa his3D1 leu2D0 met15D0 ura3D0 GVP36-HA::KlURA3	This study
YS082	MATa his3D1 leu2D0 met15D0 ura3D0 MDH1-HA::KlURA3	This study
YS083	MATa his3D1 leu2D0 met15D0 ura3D0 YLR257W-HA::KlURA3	This study
YS084	MATa his3D1 leu2D0 met15D0 ura3D0 SOL2-HA::KlURA3	This study
YS085	MATa his3D1 leu2D0 met15D0 ura3D0 ILV6-HA::KlURA3	This study
YS086	MATa his3D1 leu2D0 met15D0 ura3D0 PLN1-HA::KlURA3	This study
YS087	MATa his3D1 leu2D0 met15D0 ura3D0 PRO3-HA::KlURA3	This study
YS088	MATa his3D1 leu2D0 met15D0 ura3D0 BCP1-HA::KlURA3	This study
YS089	MATa his3D1 leu2D0 met15D0 ura3D0 MCM1-HA::KlURA3	This study
YS090	MATa his3D1 leu2D0 met15D0 ura3D0 PHB1-HA::KlURA3	This study
YS091	MATa his3D1 leu2D0 met15D0 ura3D0 RPS18B-HA::KlURA3	This study
YS092	MATa his3D1 leu2D0 met15D0 ura3D0 RRP42-HA::KlURA3	This study
YS093	MATa his3D1 leu2D0 met15D0 ura3D0 RPS24B-HA::KlURA3	This study
YS094	MATa his3D1 leu2D0 met15D0 ura3D0 UTP30-HA::KlURA3	This study
YS095	MATa his3D1 leu2D0 met15D0 ura3D0 RVS161-HA::KlURA3	This study
YS096	MATa his3D1 leu2D0 met15D0 ura3D0 VPS60-HA::KlURA3	This study
YS097	MATa his3D1 leu2D0 met15D0 ura3D0 SGF29-HA::KlURA3	This study
YS098	MATa his3D1 leu2D0 met15D0 ura3D0 YHR127W-HA::KlURA3	This study
YS099	MATa his3D1 leu2D0 met15D0 ura3D0 BSC2-HA::KlURA3	This study
YS100	MATa his3D1 leu2D0 met15D0 ura3D0 RRP17-HA::KlURA3	This study
YS101	MATa his3D1 leu2D0 met15D0 ura3D0 SSP120-HA::KlURA3	This study
YS102	MATa his3D1 leu2D0 met15D0 ura3D0 NOP15-HA::KlURA3	This study
YS103	MATa his3D1 leu2D0 met15D0 ura3D0 SPC24-HA::KlURA3	This study
YS104	MATa his3D1 leu2D0 met15D0 ura3D0 LOC1-HA::KlURA3	This study
YS105	MATa his3D1 leu2D0 met15D0 ura3D0 DID2-HA::KlURA3	This study
YS106	MATa his3D1 leu2D0 met15D0 ura3D0 TIP1-HA::KlURA3	This study
YS107	MATa his3D1 leu2D0 met15D0 ura3D0 NHP10-HA::KlURA3	This study
YS108	MATa his3D1 leu2D0 met15D0 ura3D0 TSA1-HA::KlURA3	This study
YS109	MATa his3D1 leu2D0 met15D0 ura3D0 MET14-HA::KlURA3	This study
YS110	MATa his3D1 leu2D0 met15D0 ura3D0 MEH1-HA::KlURA3	This study
YS111	MATa his3D1 leu2D0 met15D0 ura3D0 AIM13-HA::KlURA3	This study
YS112	MATa his3D1 leu2D0 met15D0 ura3D0 LSM1-HA::KlURA3	This study
YS113	MATa his3D1 leu2D0 met15D0 ura3D0 ALB1-HA::KlURA3	This study
YS114	MATa his3D1 leu2D0 met15D0 ura3D0 YAH1-HA::KlURA3	This study
YS115	MATa his3D1 leu2D0 met15D0 ura3D0 CPR1-HA::KlURA3	This study
YS116	MATa his3D1 leu2D0 met15D0 ura3D0 MRPL19-HA::KlURA3	This study
YS117	MATa his3D1 leu2D0 met15D0 ura3D0 SLM4-HA::KlURA3	This study
YS118	MATa his3D1 leu2D0 met15D0 ura3D0 BUR6-HA::KlURA3	This study
YS119	MATa his3D1 leu2D0 met15D0 ura3D0 ELF1-HA::KlURA3	This study
YS120	MATa his3D1 leu2D0 met15D0 ura3D0 TVP15-HA::KlURA3	This study
YS121	MATa his3D1 leu2D0 met15D0 ura3D0 RDL1-HA::KlURA3	This study
YS122	MATa his3D1 leu2D0 met15D0 ura3D0 PFD1-HA::KlURA3	This study
YS123	MATa his3D1 leu2D0 met15D0 ura3D0 RRT8-HA::KlURA3	This study
YS124	MATa his3D1 leu2D0 met15D0 ura3D0 QCR10-HA::KlURA3	This study
YS125	MATa his3D1 leu2D0 met15D0 ura3D0 DAD3-HA::KlURA3	This study
YS126	MATa his3D1 leu2D0 met15D0 ura3D0 TIM11-HA::KlURA3	This study
YS127	MATa his3D1 leu2D0 met15D0 ura3D0 YMR122W-A-HA::KlURA3	This study
YS128	MATa his3D1 leu2D0 met15D0 ura3D0 DDR2-HA::KlURA3	This study
YS129	MATa his3D1 leu2D0 met15D0 ura3D0 SMX2-HA::KlURA3	This study
YS130	MATa his3D1 leu2D0 met15D0 ura3D0 SEC3-HA::KlURA3	This study
YS131	MATa his3D1 leu2D0 met15D0 ura3D0 PIM1-HA::KlURA3	This study
YS132	MATa his3D1 leu2D0 met15D0 ura3D0 PMC1-HA::KlURA3	This study
YS133	MATa his3D1 leu2D0 met15D0 ura3D0 MET10-HA::KlURA3	This study
YS134	MATa his3D1 leu2D0 met15D0 ura3D0 APL6-HA::KlURA3	This study
YS135	MATa his3D1 leu2D0 met15D0 ura3D0 PEX6-HA::KlURA3	This study
YS136	MATa his3D1 leu2D0 met15D0 ura3D0 APL5-HA::KlURA3	This study
YS137	MATa his3D1 leu2D0 met15D0 ura3D0 MDV1-HA::KlURA3	This study
YS138	MATa his3D1 leu2D0 met15D0 ura3D0 VID27-HA::KlURA3	This study
YS139	MATa his3D1 leu2D0 met15D0 ura3D0 FCY2-HA::KlURA3	This study
YS140	MATa his3D1 leu2D0 met15D0 ura3D0 NUP60-HA::KlURA3	This study
YS141	MATa his3D1 leu2D0 met15D0 ura3D0 MDJ1-HA::KlURA3	This study
YS142	MATa his3D1 leu2D0 met15D0 ura3D0 GLE1-HA::KlURA3	This study
YS143	MATa his3D1 leu2D0 met15D0 ura3D0 OLE1-HA::KlURA3	This study
YS144	MATa his3D1 leu2D0 met15D0 ura3D0 FEN1-HA::KlURA3	This study
YS145	MATa his3D1 leu2D0 met15D0 ura3D0 CYT1-HA::KlURA3	This study
YS146	MATa his3D1 leu2D0 met15D0 ura3D0 CBP3-HA::KlURA3	This study
YS147	MATa his3D1 leu2D0 met15D0 ura3D0 ANT1-HA::KlURA3	This study
YS148	MATa his3D1 leu2D0 met15D0 ura3D0 PGA3-HA::KlURA3	This study
YS149	MATa his3D1 leu2D0 met15D0 ura3D0 YOL092W-HA::KlURA3	This study
YS150	MATa his3D1 leu2D0 met15D0 ura3D0 COQ3-HA::KlURA3	This study
YS151	MATa his3D1 leu2D0 met15D0 ura3D0 RHO5-HA::KlURA3	This study
YS152	MATa his3D1 leu2D0 met15D0 ura3D0 FSF1-HA::KlURA3	This study
YS153	MATa his3D1 leu2D0 met15D0 ura3D0 VPS5-HA::KlURA3	This study
YS154	MATa his3D1 leu2D0 met15D0 ura3D0 SLC1-HA::KlURA3	This study
YS155	MATa his3D1 leu2D0 met15D0 ura3D0 ATP3-HA::KlURA3	This study
YS156	MATa his3D1 leu2D0 met15D0 ura3D0 POM33-HA::KlURA3	This study
YS157	MATa his3D1 leu2D0 met15D0 ura3D0 ATP10-HA::KlURA3	This study
YS158	MATa his3D1 leu2D0 met15D0 ura3D0 TRS33-HA::KlURA3	This study
YS159	MATa his3D1 leu2D0 met15D0 ura3D0 YPL162C-HA::KlURA3	This study
YS160	MATa his3D1 leu2D0 met15D0 ura3D0 DPM1-HA::KlURA3	This study
YS161	MATa his3D1 leu2D0 met15D0 ura3D0 ADK2-HA::KlURA3	This study
YS162	MATa his3D1 leu2D0 met15D0 ura3D0 BXI1-HA::KlURA3	This study
YS163	MATa his3D1 leu2D0 met15D0 ura3D0 DPP1-HA::KlURA3	This study
YS164	MATa his3D1 leu2D0 met15D0 ura3D0 RBD2-HA::KlURA3	This study
YS165	MATa his3D1 leu2D0 met15D0 ura3D0 SNF7-HA::KlURA3	This study
YS166	MATa his3D1 leu2D0 met15D0 ura3D0 MDM12-HA::KlURA3	This study
YS167	MATa his3D1 leu2D0 met15D0 ura3D0 ERP1-HA::KlURA3	This study
YS168	MATa his3D1 leu2D0 met15D0 ura3D0 EMP24-HA::KlURA3	This study
YS169	MATa his3D1 leu2D0 met15D0 ura3D0 ERV25-HA::KlURA3	This study
YS170	MATa his3D1 leu2D0 met15D0 ura3D0 SDH4-HA::KlURA3	This study
YS171	MATa his3D1 leu2D0 met15D0 ura3D0 ATP19-HA::KlURA3	This study
YS172	MATa his3D1 leu2D0 met15D0 ura3D0 TRX2-HA::KlURA3	This study
YS173	MATa his3D1 leu2D0 met15D0 ura3D0 SNC2-HA::KlURA3	This study
YS174	MATa his3D1 leu2D0 met15D0 ura3D0 COX7-HA::KlURA3	This study
YS175	MATa his3D1 leu2D0 met15D0 ura3D0 VMA21-HA::KlURA3	This study
YS176	MATa his3D1 leu2D0 met15D0 ura3D0 MYO2-GFP::His3MX6	Huh et al., 2003
YS177	MATa his3D1 leu2D0 met15D0 ura3D0 XRN1-GFP::His3MX6	Huh et al., 2003
YS178	MATa his3D1 leu2D0 met15D0 ura3D0 GLT1-GFP::His3MX6	Huh et al., 2003
YS179	MATa his3D1 leu2D0 met15D0 ura3D0 MYO4-GFP::His3MX6	Huh et al., 2003
YS180	MATa his3D1 leu2D0 met15D0 ura3D0 ROM2-GFP::His3MX6	Huh et al., 2003
YS181	MATa his3D1 leu2D0 met15D0 ura3D0 GEA1-GFP::His3MX6	Huh et al., 2003
YS182	MATa his3D1 leu2D0 met15D0 ura3D0 EDE1-GFP::His3MX6	Huh et al., 2003
YS183	MATa his3D1 leu2D0 met15D0 ura3D0 KAP123-GFP::His3MX6	Huh et al., 2003
YS184	MATa his3D1 leu2D0 met15D0 ura3D0 GDH2-GFP::His3MX6	Huh et al., 2003
YS185	MATa his3D1 leu2D0 met15D0 ura3D0 MYO5-GFP::His3MX6	Huh et al., 2003
YS186	MATa his3D1 leu2D0 met15D0 ura3D0 GIN4-GFP::His3MX6	Huh et al., 2003
YS187	MATa his3D1 leu2D0 met15D0 ura3D0 INP53-GFP::His3MX6	Huh et al., 2003
YS188	MATa his3D1 leu2D0 met15D0 ura3D0 PSE1-GFP::His3MX6	Huh et al., 2003
YS189	MATa his3D1 leu2D0 met15D0 ura3D0 GCV2-GFP::His3MX6	Huh et al., 2003
YS190	MATa his3D1 leu2D0 met15D0 ura3D0 YPR097W-GFP::His3MX6	Huh et al., 2003
YS191	MATa his3D1 leu2D0 met15D0 ura3D0 KGD1-GFP::His3MX6	Huh et al., 2003
YS192	MATa his3D1 leu2D0 met15D0 ura3D0 CAF120-GFP::His3MX6	Huh et al., 2003
YS193	MATa his3D1 leu2D0 met15D0 ura3D0 VPS35-GFP::His3MX6	Huh et al., 2003
YS194	MATa his3D1 leu2D0 met15D0 ura3D0 DCP2-GFP::His3MX6	Huh et al., 2003
YS195	MATa his3D1 leu2D0 met15D0 ura3D0 YAR044W-GFP::His3MX6	Huh et al., 2003
YS196	MATa his3D1 leu2D0 met15D0 ura3D0 APL4-GFP::His3MX6	Huh et al., 2003
YS197	MATa his3D1 leu2D0 met15D0 ura3D0 VPS16-GFP::His3MX6	Huh et al., 2003
YS198	MATa his3D1 leu2D0 met15D0 ura3D0 ACO2-GFP::His3MX6	Huh et al., 2003
YS199	MATa his3D1 leu2D0 met15D0 ura3D0 SEY1-GFP::His3MX6	Huh et al., 2003
YS200	MATa his3D1 leu2D0 met15D0 ura3D0 RGD2-GFP::His3MX6	Huh et al., 2003
YS201	MATa his3D1 leu2D0 met15D0 ura3D0 GCD6-GFP::His3MX6	Huh et al., 2003
YS202	MATa his3D1 leu2D0 met15D0 ura3D0 APL2-GFP::His3MX6	Huh et al., 2003
YS203	MATa his3D1 leu2D0 met15D0 ura3D0 YPR090W-GFP::His3MX6	Huh et al., 2003
YS204	MATa his3D1 leu2D0 met15D0 ura3D0 SET2-GFP::His3MX6	Huh et al., 2003
YS205	MATa his3D1 leu2D0 met15D0 ura3D0 ACS1-GFP::His3MX6	Huh et al., 2003
YS206	MATa his3D1 leu2D0 met15D0 ura3D0 UTP8-GFP::His3MX6	Huh et al., 2003
YS207	MATa his3D1 leu2D0 met15D0 ura3D0 FAA1-GFP::His3MX6	Huh et al., 2003
YS208	MATa his3D1 leu2D0 met15D0 ura3D0 YLR072W-GFP::His3MX6	Huh et al., 2003
YS209	MATa his3D1 leu2D0 met15D0 ura3D0 NCL1-GFP::His3MX6	Huh et al., 2003
YS210	MATa his3D1 leu2D0 met15D0 ura3D0 MSS116-GFP::His3MX6	Huh et al., 2003
YS211	MATa his3D1 leu2D0 met15D0 ura3D0 RGD1-GFP::His3MX6	Huh et al., 2003
YS212	MATa his3D1 leu2D0 met15D0 ura3D0 NOC3-GFP::His3MX6	Huh et al., 2003
YS213	MATa his3D1 leu2D0 met15D0 ura3D0 MSB3-GFP::His3MX6	Huh et al., 2003
YS214	MATa his3D1 leu2D0 met15D0 ura3D0 ABP140-GFP::His3MX6	Huh et al., 2003
YS215	MATa his3D1 leu2D0 met15D0 ura3D0 UTP5-GFP::His3MX6	Huh et al., 2003
YS216	MATa his3D1 leu2D0 met15D0 ura3D0 TGL3-GFP::His3MX6	Huh et al., 2003
YS217	MATa his3D1 leu2D0 met15D0 ura3D0 AIP1-GFP::His3MX6	Huh et al., 2003
YS218	MATa his3D1 leu2D0 met15D0 ura3D0 URA7-GFP::His3MX6	Huh et al., 2003
YS219	MATa his3D1 leu2D0 met15D0 ura3D0 GCD1-GFP::His3MX6	Huh et al., 2003
YS220	MATa his3D1 leu2D0 met15D0 ura3D0 ILV1-GFP::His3MX6	Huh et al., 2003
YS221	MATa his3D1 leu2D0 met15D0 ura3D0 RPL7A-GFP::His3MX6	Huh et al., 2003
YS222	MATa his3D1 leu2D0 met15D0 ura3D0 TRM1-GFP::His3MX6	Huh et al., 2003
YS223	MATa his3D1 leu2D0 met15D0 ura3D0 SRP1-GFP::His3MX6	Huh et al., 2003
YS224	MATa his3D1 leu2D0 met15D0 ura3D0 MCX1-GFP::His3MX6	Huh et al., 2003
YS225	MATa his3D1 leu2D0 met15D0 ura3D0 GCD11-GFP::His3MX6	Huh et al., 2003
YS226	MATa his3D1 leu2D0 met15D0 ura3D0 NAB2-GFP::His3MX6	Huh et al., 2003
YS227	MATa his3D1 leu2D0 met15D0 ura3D0 HOM3-GFP::His3MX6	Huh et al., 2003
YS228	MATa his3D1 leu2D0 met15D0 ura3D0 JIP5-GFP::His3MX6	Huh et al., 2003
YS229	MATa his3D1 leu2D0 met15D0 ura3D0 CYS4-GFP::His3MX6	Huh et al., 2003
YS230	MATa his3D1 leu2D0 met15D0 ura3D0 ALD6-GFP::His3MX6	Huh et al., 2003
YS231	MATa his3D1 leu2D0 met15D0 ura3D0 GLK1-GFP::His3MX6	Huh et al., 2003
YS232	MATa his3D1 leu2D0 met15D0 ura3D0 LPD1-GFP::His3MX6	Huh et al., 2003
YS233	MATa his3D1 leu2D0 met15D0 ura3D0 LSB3-GFP::His3MX6	Huh et al., 2003
YS234	MATa his3D1 leu2D0 met15D0 ura3D0 ZPR1-GFP::His3MX6	Huh et al., 2003
YS235	MATa his3D1 leu2D0 met15D0 ura3D0 RVS167-GFP::His3MX6	Huh et al., 2003
YS236	MATa his3D1 leu2D0 met15D0 ura3D0 SHM2-GFP::His3MX6	Huh et al., 2003
YS237	MATa his3D1 leu2D0 met15D0 ura3D0 AIM17-GFP::His3MX6	Huh et al., 2003
YS238	MATa his3D1 leu2D0 met15D0 ura3D0 UTR2-GFP::His3MX6	Huh et al., 2003
YS239	MATa his3D1 leu2D0 met15D0 ura3D0 IVY1-GFP::His3MX6	Huh et al., 2003
YS240	MATa his3D1 leu2D0 met15D0 ura3D0 KES1-GFP::His3MX6	Huh et al., 2003
YS241	MATa his3D1 leu2D0 met15D0 ura3D0 WTM1-GFP::His3MX6	Huh et al., 2003
YS242	MATa his3D1 leu2D0 met15D0 ura3D0 MDH2-GFP::His3MX6	Huh et al., 2003
YS243	MATa his3D1 leu2D0 met15D0 ura3D0 ENT5-GFP::His3MX6	Huh et al., 2003
YS244	MATa his3D1 leu2D0 met15D0 ura3D0 YMR010W-GFP::His3MX6	Huh et al., 2003
YS245	MATa his3D1 leu2D0 met15D0 ura3D0 RAD51-GFP::His3MX6	Huh et al., 2003
YS246	MATa his3D1 leu2D0 met15D0 ura3D0 RTN2-GFP::His3MX6	Huh et al., 2003
YS247	MATa his3D1 leu2D0 met15D0 ura3D0 AIM24-GFP::His3MX6	Huh et al., 2003
YS248	MATa his3D1 leu2D0 met15D0 ura3D0 YKL077W-GFP::His3MX6	Huh et al., 2003
YS249	MATa his3D1 leu2D0 met15D0 ura3D0 MAP1-GFP::His3MX6	Huh et al., 2003
YS250	MATa his3D1 leu2D0 met15D0 ura3D0 GLY1-GFP::His3MX6	Huh et al., 2003
YS251	MATa his3D1 leu2D0 met15D0 ura3D0 RAI1-GFP::His3MX6	Huh et al., 2003
YS252	MATa his3D1 leu2D0 met15D0 ura3D0 HSP42-GFP::His3MX6	Huh et al., 2003
YS253	MATa his3D1 leu2D0 met15D0 ura3D0 ARO4-GFP::His3MX6	Huh et al., 2003
YS254	MATa his3D1 leu2D0 met15D0 ura3D0 ARC35-GFP::His3MX6	Huh et al., 2003
YS255	MATa his3D1 leu2D0 met15D0 ura3D0 YER156C-GFP::His3MX6	Huh et al., 2003
YS256	MATa his3D1 leu2D0 met15D0 ura3D0 GVP36-GFP::His3MX6	Huh et al., 2003
YS257	MATa his3D1 leu2D0 met15D0 ura3D0 MDH1-GFP::His3MX6	Huh et al., 2003
YS258	MATa his3D1 leu2D0 met15D0 ura3D0 YLR257W-GFP::His3MX6	Huh et al., 2003
YS259	MATa his3D1 leu2D0 met15D0 ura3D0 SOL2-GFP::His3MX6	Huh et al., 2003
YS260	MATa his3D1 leu2D0 met15D0 ura3D0 ILV6-GFP::His3MX6	Huh et al., 2003
YS261	MATa his3D1 leu2D0 met15D0 ura3D0 PLN1-GFP::His3MX6	Huh et al., 2003
YS262	MATa his3D1 leu2D0 met15D0 ura3D0 PRO3-GFP::His3MX6	Huh et al., 2003
YS263	MATa his3D1 leu2D0 met15D0 ura3D0 BCP1-GFP::His3MX6	Huh et al., 2003
YS264	MATa his3D1 leu2D0 met15D0 ura3D0 MCM1-GFP::His3MX6	Huh et al., 2003
YS265	MATa his3D1 leu2D0 met15D0 ura3D0 PHB1-GFP::His3MX6	Huh et al., 2003
YS266	MATa his3D1 leu2D0 met15D0 ura3D0 RPS18B-GFP::His3MX6	Huh et al., 2003
YS267	MATa his3D1 leu2D0 met15D0 ura3D0 RRP42-GFP::His3MX6	Huh et al., 2003
YS268	MATa his3D1 leu2D0 met15D0 ura3D0 RPS24B-GFP::His3MX6	Huh et al., 2003
YS269	MATa his3D1 leu2D0 met15D0 ura3D0 UTP30-GFP::His3MX6	Huh et al., 2003
YS270	MATa his3D1 leu2D0 met15D0 ura3D0 RVS161-GFP::His3MX6	Huh et al., 2003
YS271	MATa his3D1 leu2D0 met15D0 ura3D0 VPS60-GFP::His3MX6	Huh et al., 2003
YS272	MATa his3D1 leu2D0 met15D0 ura3D0 SGF29-GFP::His3MX6	Huh et al., 2003
YS273	MATa his3D1 leu2D0 met15D0 ura3D0 YHR127W-GFP::His3MX6	Huh et al., 2003
YS274	MATa his3D1 leu2D0 met15D0 ura3D0 BSC2-GFP::His3MX6	Huh et al., 2003
YS275	MATa his3D1 leu2D0 met15D0 ura3D0 RRP17-GFP::His3MX6	Huh et al., 2003
YS276	MATa his3D1 leu2D0 met15D0 ura3D0 SSP120-GFP::His3MX6	Huh et al., 2003
YS277	MATa his3D1 leu2D0 met15D0 ura3D0 NOP15-GFP::His3MX6	Huh et al., 2003
YS278	MATa his3D1 leu2D0 met15D0 ura3D0 SPC24-GFP::His3MX6	Huh et al., 2003
YS279	MATa his3D1 leu2D0 met15D0 ura3D0 LOC1-GFP::His3MX6	Huh et al., 2003
YS280	MATa his3D1 leu2D0 met15D0 ura3D0 DID2-GFP::His3MX6	Huh et al., 2003
YS281	MATa his3D1 leu2D0 met15D0 ura3D0 TIP1-GFP::His3MX6	Huh et al., 2003
YS282	MATa his3D1 leu2D0 met15D0 ura3D0 NHP10-GFP::His3MX6	Huh et al., 2003
YS283	MATa his3D1 leu2D0 met15D0 ura3D0 TSA1-GFP::His3MX6	Huh et al., 2003
YS284	MATa his3D1 leu2D0 met15D0 ura3D0 MET14-GFP::His3MX6	Huh et al., 2003
YS285	MATa his3D1 leu2D0 met15D0 ura3D0 MEH1-GFP::His3MX6	Huh et al., 2003
YS286	MATa his3D1 leu2D0 met15D0 ura3D0 AIM13-GFP::His3MX6	Huh et al., 2003
YS287	MATa his3D1 leu2D0 met15D0 ura3D0 LSM1-GFP::His3MX6	Huh et al., 2003
YS288	MATa his3D1 leu2D0 met15D0 ura3D0 ALB1-GFP::His3MX6	Huh et al., 2003
YS289	MATa his3D1 leu2D0 met15D0 ura3D0 YAH1-GFP::His3MX6	Huh et al., 2003
YS290	MATa his3D1 leu2D0 met15D0 ura3D0 CPR1-GFP::His3MX6	Huh et al., 2003
YS291	MATa his3D1 leu2D0 met15D0 ura3D0 MRPL19-GFP::His3MX6	Huh et al., 2003
YS292	MATa his3D1 leu2D0 met15D0 ura3D0 SLM4-GFP::His3MX6	Huh et al., 2003
YS293	MATa his3D1 leu2D0 met15D0 ura3D0 BUR6-GFP::His3MX6	Huh et al., 2003
YS294	MATa his3D1 leu2D0 met15D0 ura3D0 ELF1-GFP::His3MX6	Huh et al., 2003
YS295	MATa his3D1 leu2D0 met15D0 ura3D0 TVP15-GFP::His3MX6	Huh et al., 2003
YS296	MATa his3D1 leu2D0 met15D0 ura3D0 RDL1-GFP::His3MX6	Huh et al., 2003
YS297	MATa his3D1 leu2D0 met15D0 ura3D0 PFD1-GFP::His3MX6	Huh et al., 2003
YS298	MATa his3D1 leu2D0 met15D0 ura3D0 RRT8-GFP::His3MX6	Huh et al., 2003
YS299	MATa his3D1 leu2D0 met15D0 ura3D0 QCR10-GFP::His3MX6	Huh et al., 2003
YS300	MATa his3D1 leu2D0 met15D0 ura3D0 DAD3-GFP::His3MX6	Huh et al., 2003
YS301	MATa his3D1 leu2D0 met15D0 ura3D0 TIM11-GFP::His3MX6	Huh et al., 2003
YS302	MATa his3D1 leu2D0 met15D0 ura3D0 YMR122W-A-GFP::His3MX6	Huh et al., 2003
YS303	MATa his3D1 leu2D0 met15D0 ura3D0 DDR2-GFP::His3MX6	Huh et al., 2003
YS304	MATa his3D1 leu2D0 met15D0 ura3D0 SMX2-GFP::His3MX6	Huh et al., 2003
YS305	MATa his3D1 leu2D0 met15D0 ura3D0 SEC3-GFP::His3MX6	Huh et al., 2003
YS306	MATa his3D1 leu2D0 met15D0 ura3D0 PIM1-GFP::His3MX6	Huh et al., 2003
YS307	MATa his3D1 leu2D0 met15D0 ura3D0 PMC1-GFP::His3MX6	Huh et al., 2003
YS308	MATa his3D1 leu2D0 met15D0 ura3D0 MET10-GFP::His3MX6	Huh et al., 2003
YS309	MATa his3D1 leu2D0 met15D0 ura3D0 APL6-GFP::His3MX6	Huh et al., 2003
YS310	MATa his3D1 leu2D0 met15D0 ura3D0 PEX6-GFP::His3MX6	Huh et al., 2003
YS311	MATa his3D1 leu2D0 met15D0 ura3D0 APL5-GFP::His3MX6	Huh et al., 2003
YS312	MATa his3D1 leu2D0 met15D0 ura3D0 MDV1-GFP::His3MX6	Huh et al., 2003
YS313	MATa his3D1 leu2D0 met15D0 ura3D0 VID27-GFP::His3MX6	Huh et al., 2003
YS314	MATa his3D1 leu2D0 met15D0 ura3D0 FCY2-GFP::His3MX6	Huh et al., 2003
YS315	MATa his3D1 leu2D0 met15D0 ura3D0 NUP60-GFP::His3MX6	Huh et al., 2003
YS316	MATa his3D1 leu2D0 met15D0 ura3D0 MDJ1-GFP::His3MX6	Huh et al., 2003
YS317	MATa his3D1 leu2D0 met15D0 ura3D0 GLE1-GFP::His3MX6	Huh et al., 2003
YS318	MATa his3D1 leu2D0 met15D0 ura3D0 OLE1-GFP::His3MX6	Huh et al., 2003
YS319	MATa his3D1 leu2D0 met15D0 ura3D0 FEN1-GFP::His3MX6	Huh et al., 2003
YS320	MATa his3D1 leu2D0 met15D0 ura3D0 CYT1-GFP::His3MX6	Huh et al., 2003
YS321	MATa his3D1 leu2D0 met15D0 ura3D0 CBP3-GFP::His3MX6	Huh et al., 2003
YS322	MATa his3D1 leu2D0 met15D0 ura3D0 ANT1-GFP::His3MX6	Huh et al., 2003
YS323	MATa his3D1 leu2D0 met15D0 ura3D0 PGA3-GFP::His3MX6	Huh et al., 2003
YS324	MATa his3D1 leu2D0 met15D0 ura3D0 YOL092W-GFP::His3MX6	Huh et al., 2003
YS325	MATa his3D1 leu2D0 met15D0 ura3D0 COQ3-GFP::His3MX6	Huh et al., 2003
YS326	MATa his3D1 leu2D0 met15D0 ura3D0 RHO5-GFP::His3MX6	Huh et al., 2003
YS327	MATa his3D1 leu2D0 met15D0 ura3D0 FSF1-GFP::His3MX6	Huh et al., 2003
YS328	MATa his3D1 leu2D0 met15D0 ura3D0 VPS5-GFP::His3MX6	Huh et al., 2003
YS329	MATa his3D1 leu2D0 met15D0 ura3D0 SLC1-GFP::His3MX6	Huh et al., 2003
YS330	MATa his3D1 leu2D0 met15D0 ura3D0 ATP3-GFP::His3MX6	Huh et al., 2003
YS331	MATa his3D1 leu2D0 met15D0 ura3D0 POM33-GFP::His3MX6	Huh et al., 2003
YS332	MATa his3D1 leu2D0 met15D0 ura3D0 ATP10-GFP::His3MX6	Huh et al., 2003
YS333	MATa his3D1 leu2D0 met15D0 ura3D0 TRS33-GFP::His3MX6	Huh et al., 2003
YS334	MATa his3D1 leu2D0 met15D0 ura3D0 YPL162C-GFP::His3MX6	Huh et al., 2003
YS335	MATa his3D1 leu2D0 met15D0 ura3D0 DPM1-GFP::His3MX6	Huh et al., 2003
YS336	MATa his3D1 leu2D0 met15D0 ura3D0 ADK2-GFP::His3MX6	Huh et al., 2003
YS337	MATa his3D1 leu2D0 met15D0 ura3D0 BXI1-GFP::His3MX6	Huh et al., 2003
YS338	MATa his3D1 leu2D0 met15D0 ura3D0 DPP1-GFP::His3MX6	Huh et al., 2003
YS339	MATa his3D1 leu2D0 met15D0 ura3D0 RBD2-GFP::His3MX6	Huh et al., 2003
YS340	MATa his3D1 leu2D0 met15D0 ura3D0 SNF7-GFP::His3MX6	Huh et al., 2003
YS341	MATa his3D1 leu2D0 met15D0 ura3D0 MDM12-GFP::His3MX6	Huh et al., 2003
YS342	MATa his3D1 leu2D0 met15D0 ura3D0 ERP1-GFP::His3MX6	Huh et al., 2003
YS343	MATa his3D1 leu2D0 met15D0 ura3D0 EMP24-GFP::His3MX6	Huh et al., 2003
YS344	MATa his3D1 leu2D0 met15D0 ura3D0 ERV25-GFP::His3MX6	Huh et al., 2003
YS345	MATa his3D1 leu2D0 met15D0 ura3D0 SDH4-GFP::His3MX6	Huh et al., 2003
YS346	MATa his3D1 leu2D0 met15D0 ura3D0 ATP19-GFP::His3MX6	Huh et al., 2003
YS347	MATa his3D1 leu2D0 met15D0 ura3D0 TRX2-GFP::His3MX6	Huh et al., 2003
YS348	MATa his3D1 leu2D0 met15D0 ura3D0 SNC2-GFP::His3MX6	Huh et al., 2003
YS349	MATa his3D1 leu2D0 met15D0 ura3D0 COX7-GFP::His3MX6	Huh et al., 2003
YS350	MATa his3D1 leu2D0 met15D0 ura3D0 VMA21-GFP::His3MX6	Huh et al., 2003
YS351	MATa his3D1 leu2D0 lys2D0 ura3D0 YLL067C-HA::KlURA3	This study
YS352	MATa his3D1 leu2D0 lys2D0 ura3D0 PPS1-HA::KlURA3	This study
YS353	MATa his3D1 leu2D0 lys2D0 ura3D0 GEM1-HA::KlURA3	This study
YS354	MATa his3D1 leu2D0 lys2D0 ura3D0 ALT1-HA::KlURA3	This study
YS355	MATa his3D1 leu2D0 lys2D0 ura3D0 AAT2-HA::KlURA3	This study
YS356	MATa his3D1 leu2D0 lys2D0 ura3D0 FBP1-HA::KlURA3	This study
YS357	MATa his3D1 leu2D0 lys2D0 ura3D0 MST27-HA::KlURA3	This study
YS358	MATa his3D1 leu2D0 lys2D0 ura3D0 YML010C-B-HA::KlURA3	This study
YS359	MATa his3D1 leu2D0 lys2D0 ura3D0 PHO84-HA::KlURA3	This study
YS360	MATa his3D1 leu2D0 lys2D0 ura3D0 SCO2-HA::KlURA3	This study
YS361	MATa his3D1 leu2D0 lys2D0 ura3D0 KlURA3::PRPL7B-HA-ATG8	This study
YS362	MATa his3D1 leu2D0 met15D0 ura3D0 YLL067C-GFP::His3MX6	This study
YS363	MATa his3D1 leu2D0 met15D0 ura3D0 PPS1-GFP::His3MX6	This study
YS364	MATa his3D1 leu2D0 met15D0 ura3D0 GEM1-GFP::His3MX6	This study
YS365	MATa his3D1 leu2D0 met15D0 ura3D0 ALT1-GFP::His3MX6	This study
YS366	MATa his3D1 leu2D0 met15D0 ura3D0 AAT2-GFP::His3MX6	This study
YS367	MATa his3D1 leu2D0 met15D0 ura3D0 FBP1-GFP::His3MX6	This study
YS368	MATa his3D1 leu2D0 met15D0 ura3D0 MST27-GFP::His3MX6	This study
YS369	MATa his3D1 leu2D0 met15D0 ura3D0 YML010C-B-GFP::His3MX6	This study
YS370	MATa his3D1 leu2D0 met15D0 ura3D0 PHO84-GFP::His3MX6	This study
YS371	MATa his3D1 leu2D0 met15D0 ura3D0 SCO2-GFP::His3MX6	This study
YS372	MATa his3D1 leu2D0 met15D0 ura3D0 His3MX6::PATG8--GFP-ATG8	This study
